# Supplementary material for: Synthesis of PDE IV inhibitors. First asymmetric synthesis of two of GlaxoSmithKline's highly potent Rolipram analogues
Source: Royal Society of Chemistry journal article supplement (doi:10.1039/c3ob41646a), 2013-01-01
Supplement: c3ob41646a.pdf [file c3ob41646a.pdf]

## *Supporting information*

### **Synthesis of PDE IV Inhibitors. \* First Asymmetric Synthesis of Two GlaxoSmithKline's Highly Potent Rolipram Analogues**

Petr A. Zhmurov,<sup>a</sup> Alexey Yu. Sukhorukov,<sup>\*a</sup> Vladimir I. Chupakhin,<sup>b</sup> Yulia V. Khomutova,<sup>a</sup> Sema L. Ioffe and Vladimir A. Tartakovsky<sup>a</sup>

<sup>a</sup>N.D. Zelinsky Institute of Organic Chemistry, Russian Academy of Sciences, 119991, Leninsky prospect, 47, Russian Federation. <sup>b</sup> Department of Chemistry, M.V. Lomonosov Moscow State University, 119991, Leninskie gory, 1, str. 3, Moscow, Russian Federation.

Tel: + 7-499-135-53-29 Fax: + 7-499-135-53-28 E-mail: [sukhorukov@ioc.ac.ru](mailto:sukhorukov@ioc.ac.ru)

## Table of Contents for Supporting Information

|                                                                                             |    |
|---------------------------------------------------------------------------------------------|----|
| NMR spectra of product <b>8</b>                                                             | 3  |
| IR spectra of product <b>8</b>                                                              | 8  |
| NMR spectra of product <b>10</b>                                                            | 9  |
| IR spectra of product <b>10</b>                                                             | 14 |
| NMR spectra of product <b>12</b>                                                            | 15 |
| NMR spectra of products (+)-CMPI <b>1</b> , (-)-CMPI <b>1</b> and <i>rac</i> -CMPI <b>1</b> | 20 |
| NMR spectra of products (+)-CMPO <b>2</b> , (-)-CMPO <b>2</b> and <i>rac</i> -CMPO <b>2</b> | 27 |
| NMR spectra of intermediate <b>11</b>                                                       | 34 |
| HRMS spectra of intermediate <b>11</b>                                                      | 35 |
| NMR spectra of intermediate <b>14</b>                                                       | 36 |
| HRMS spectra of intermediate <b>14</b>                                                      | 37 |
| NMR spectra of intermediate <b>15</b>                                                       | 38 |
| HRMS spectra of intermediate <b>15</b>                                                      | 39 |
| Evaluation of PDEIVB1 inhibition activity of CMPI <b>1</b> and CMPO <b>2</b> enantiomers    | 40 |
| Molecular docking of CMPI <b>1</b> and CMPO <b>2</b> enantiomers                            | 47 |

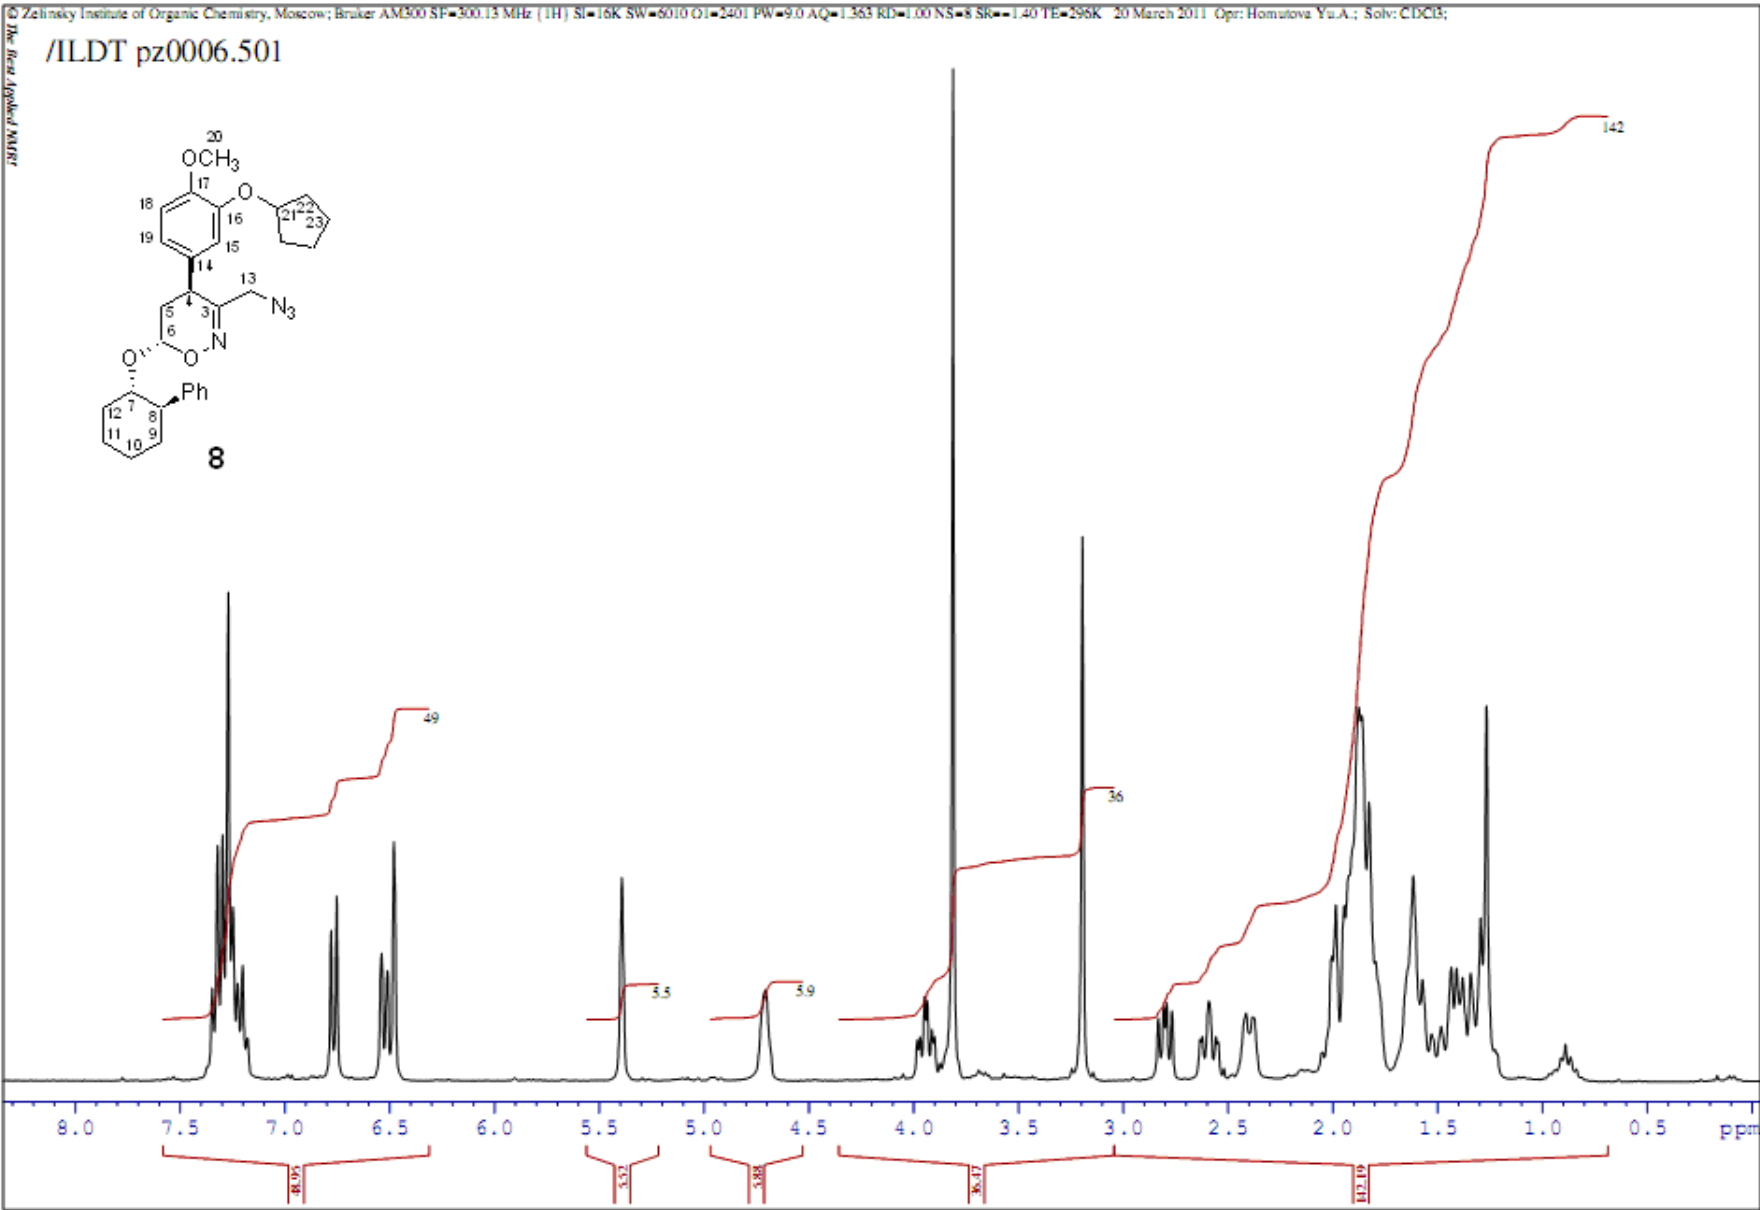

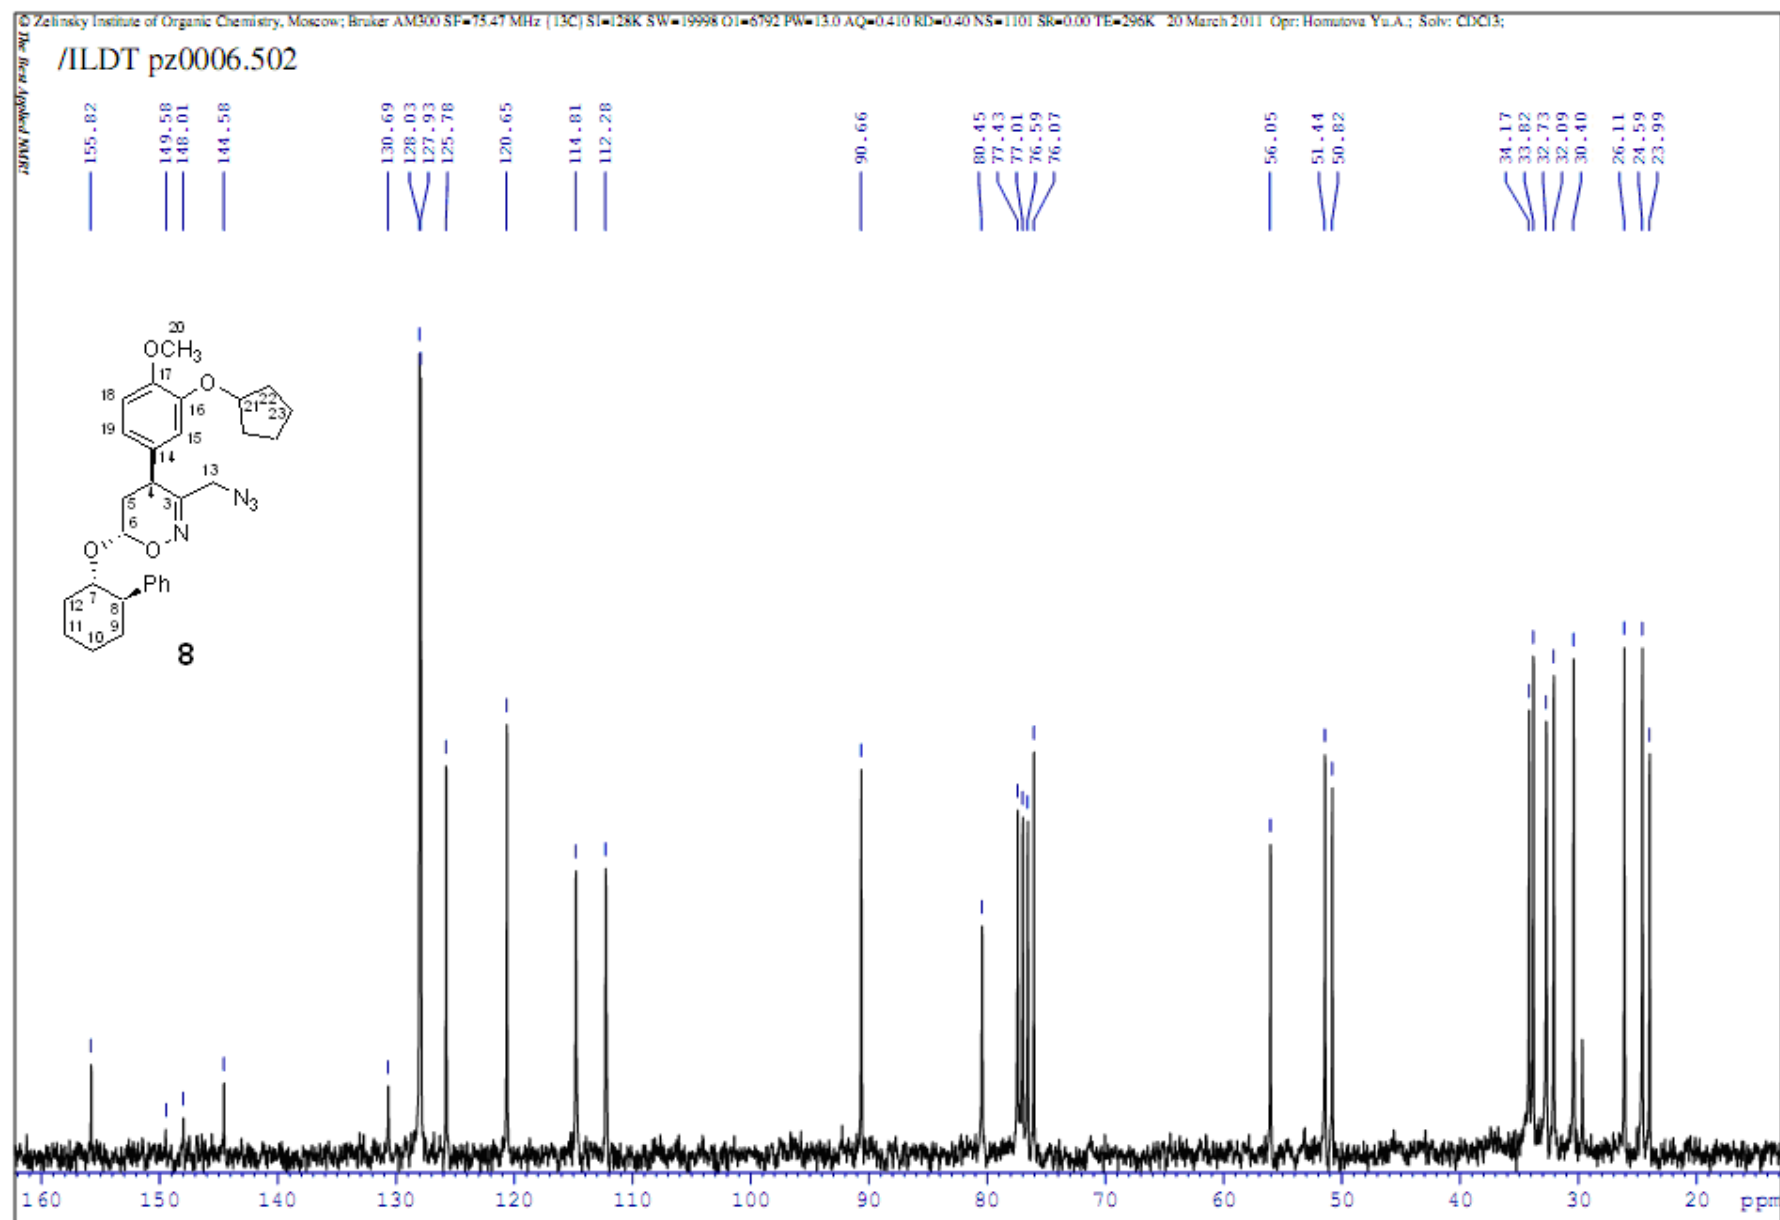

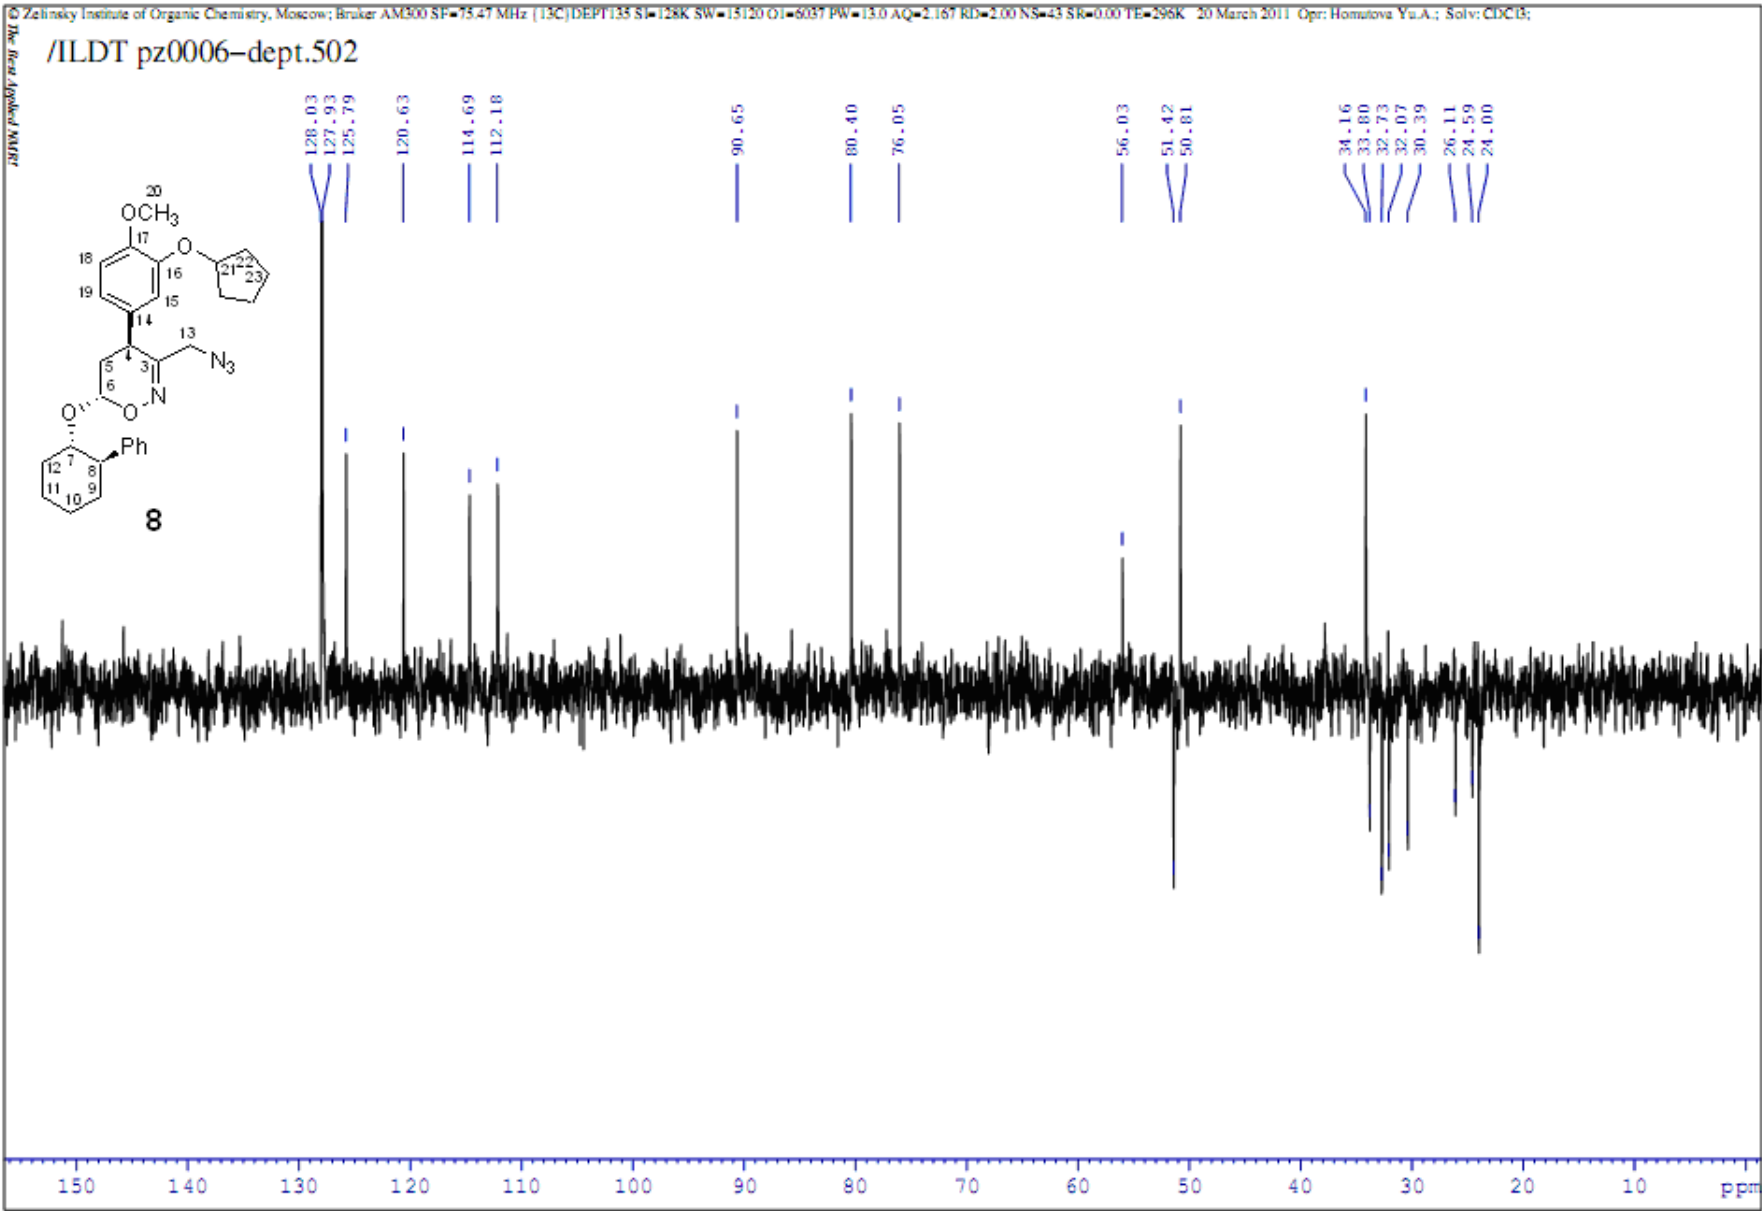

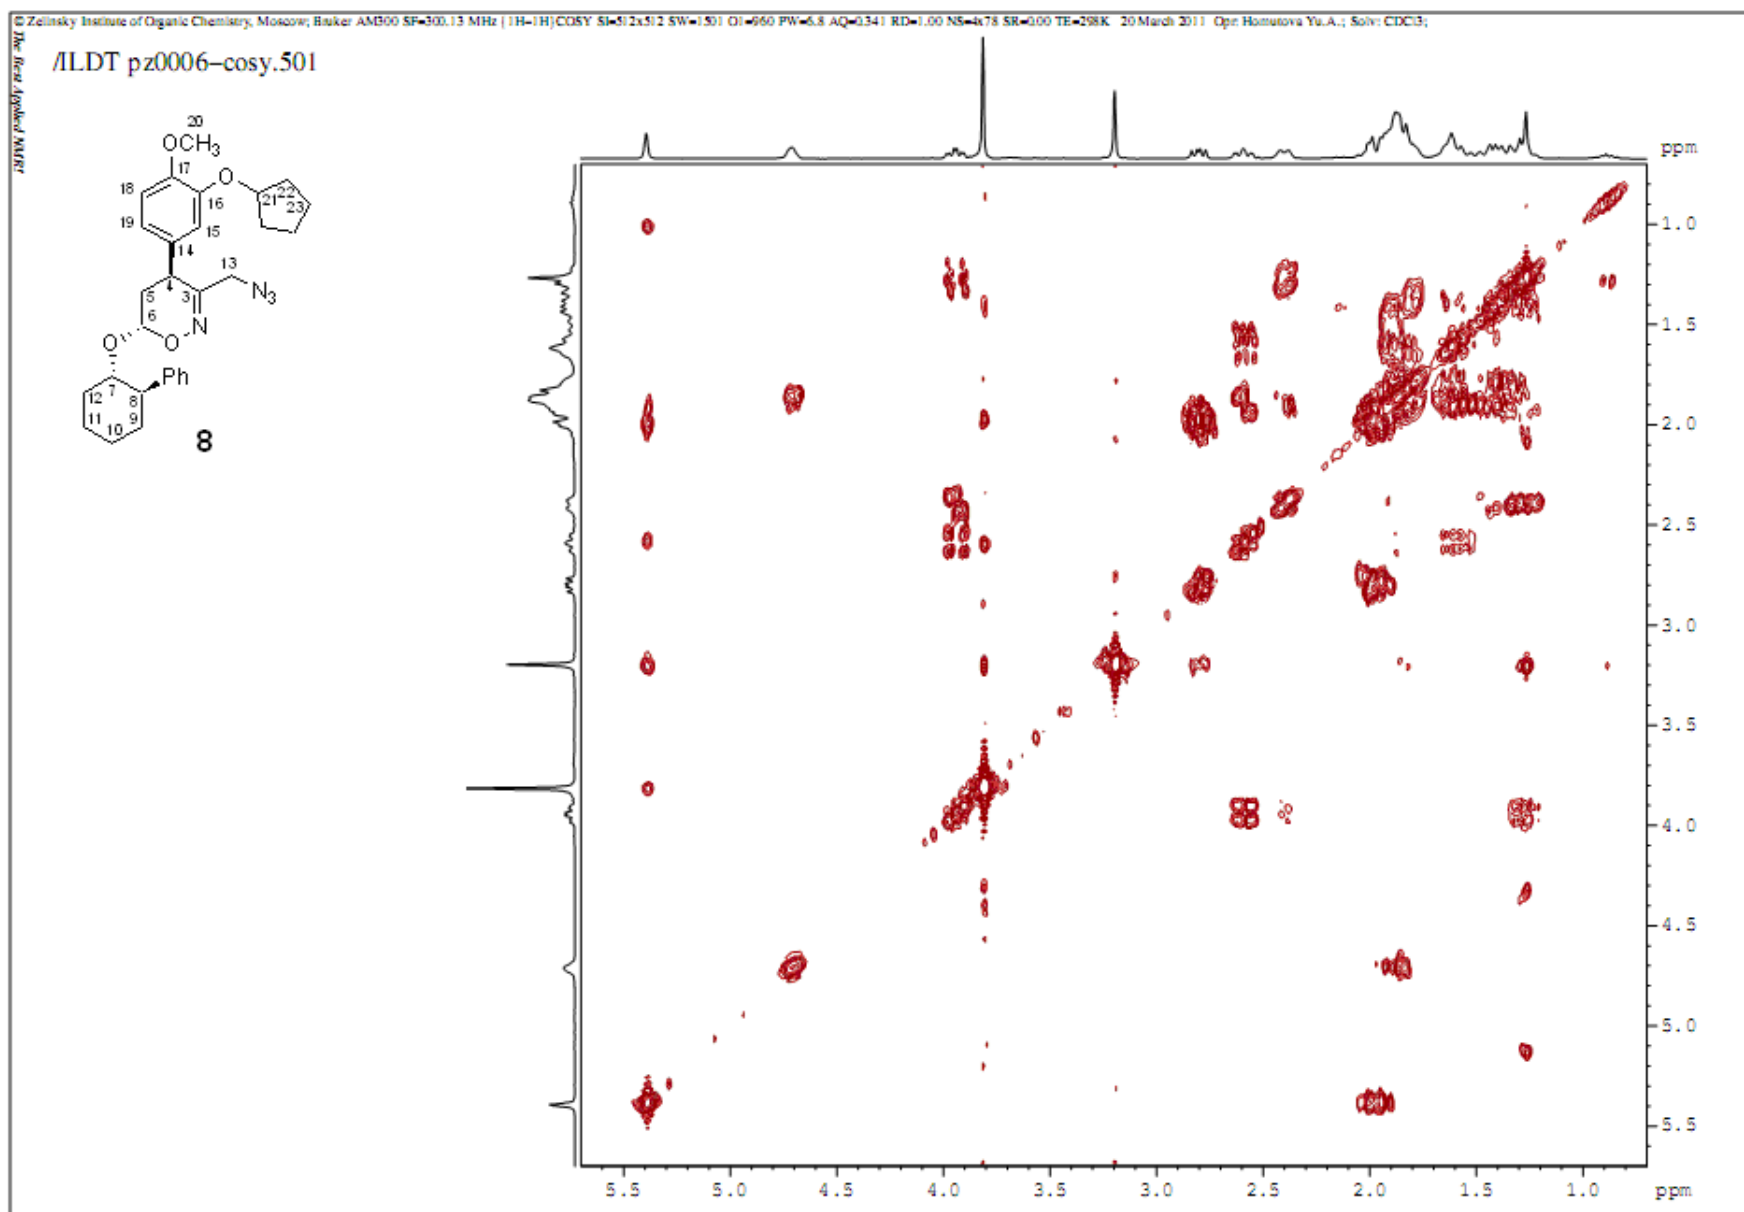

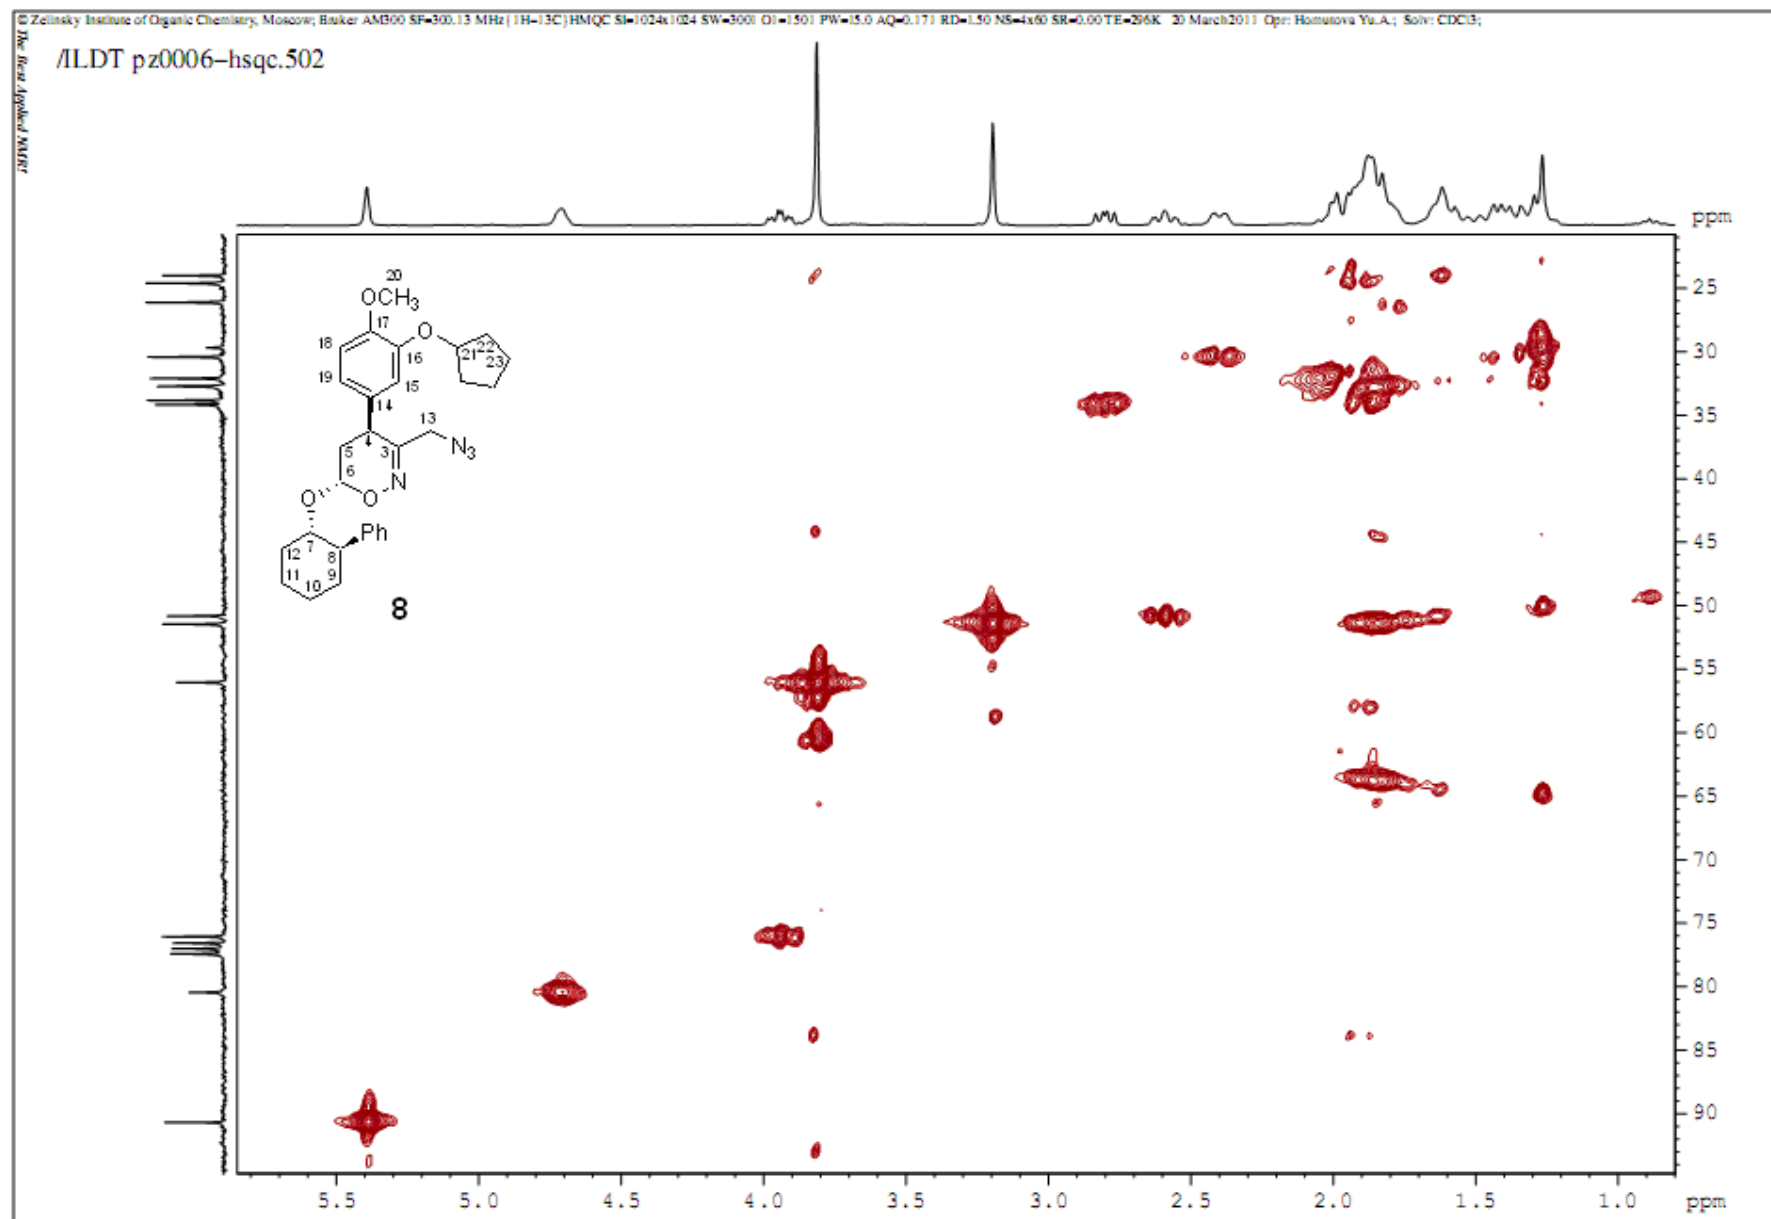

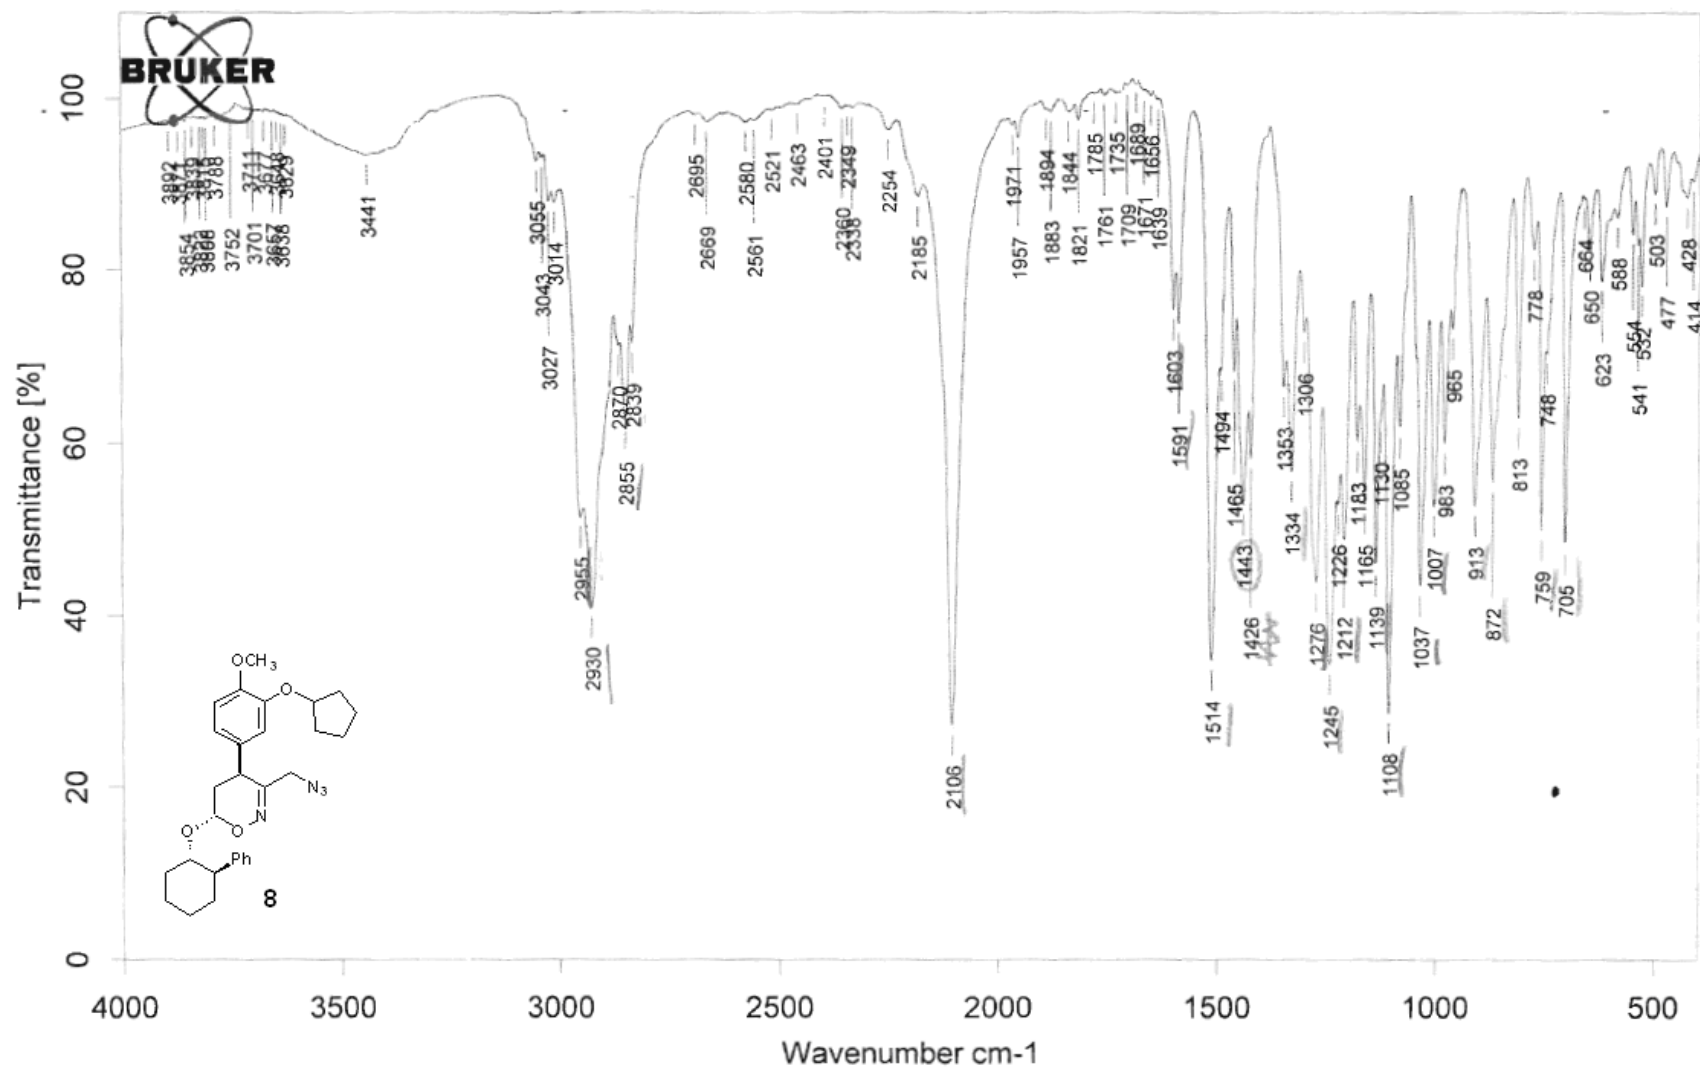

C:\Data\EDL\IPZ-006.0 SUHORUKOV PZ-006 , press.KBr, 1/200.

20/04/2012



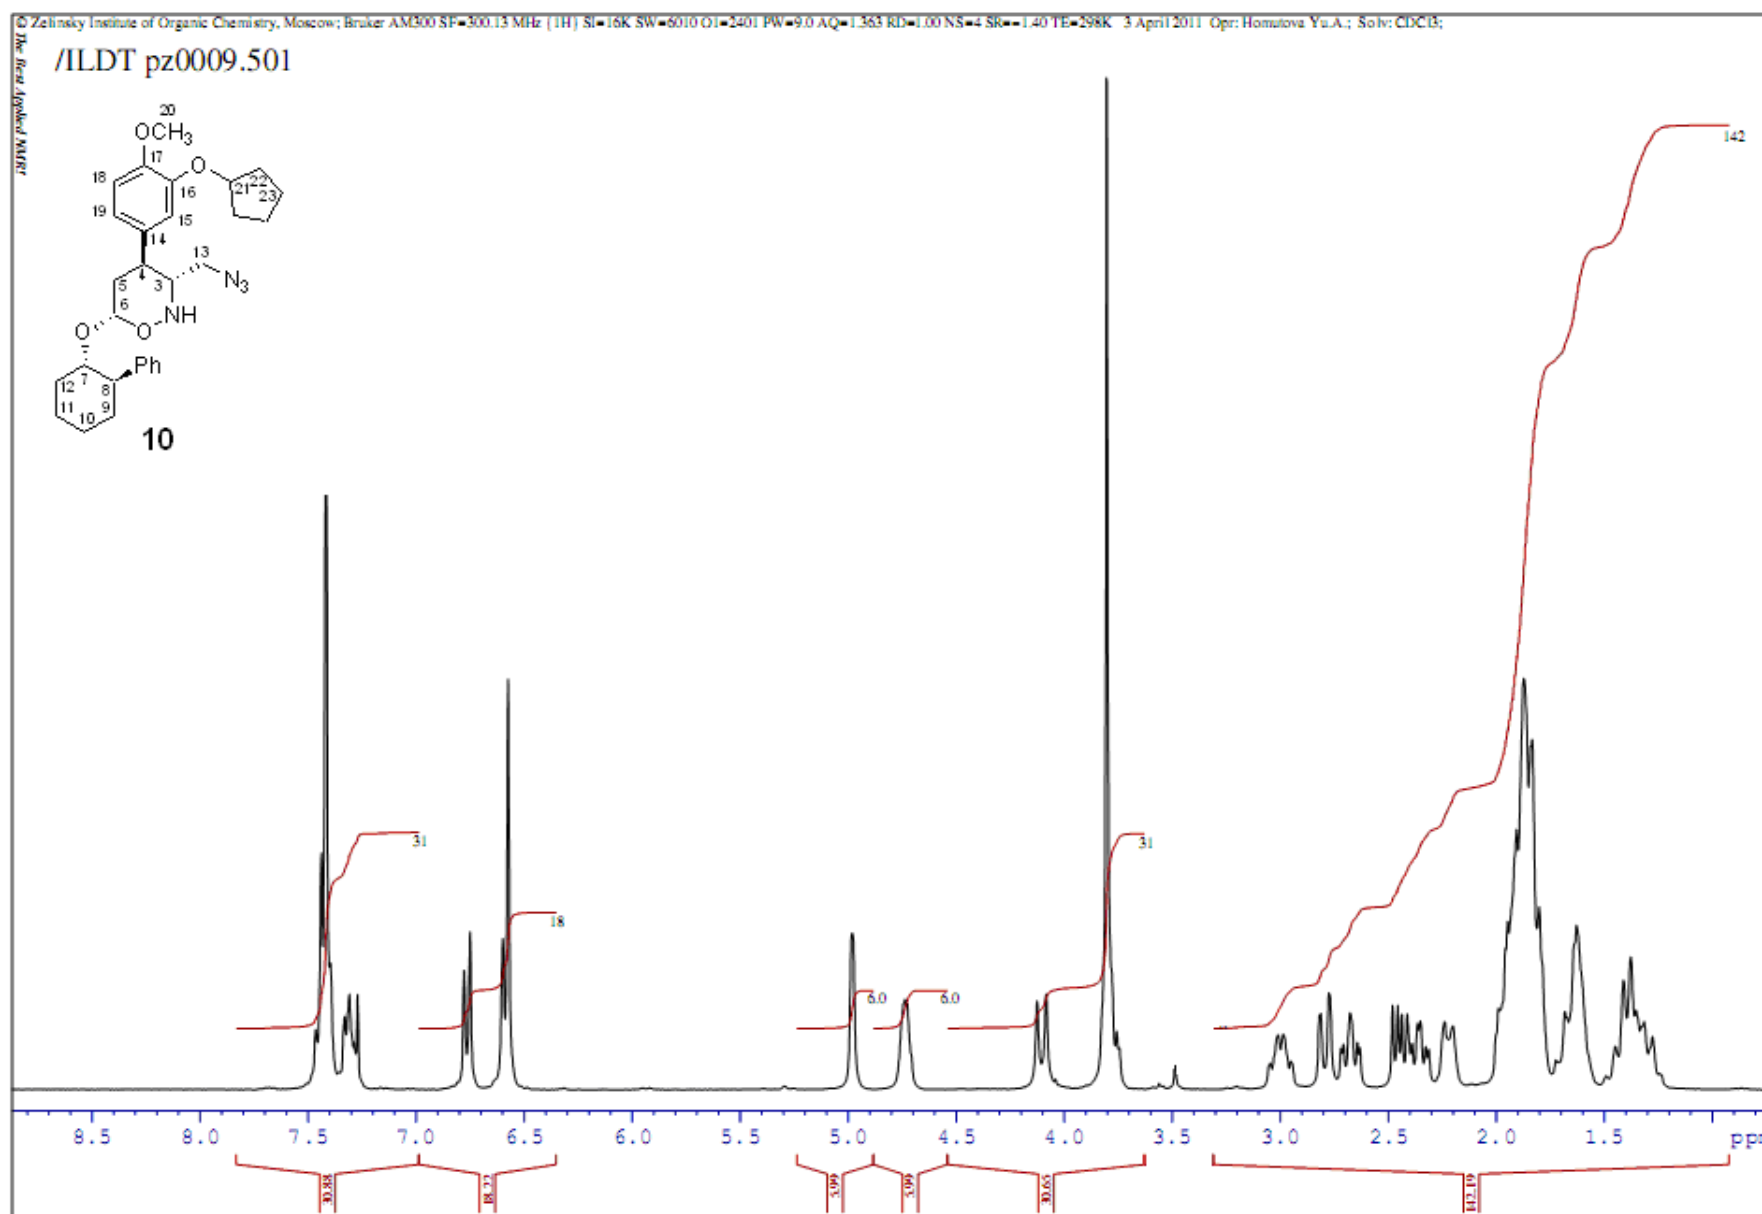

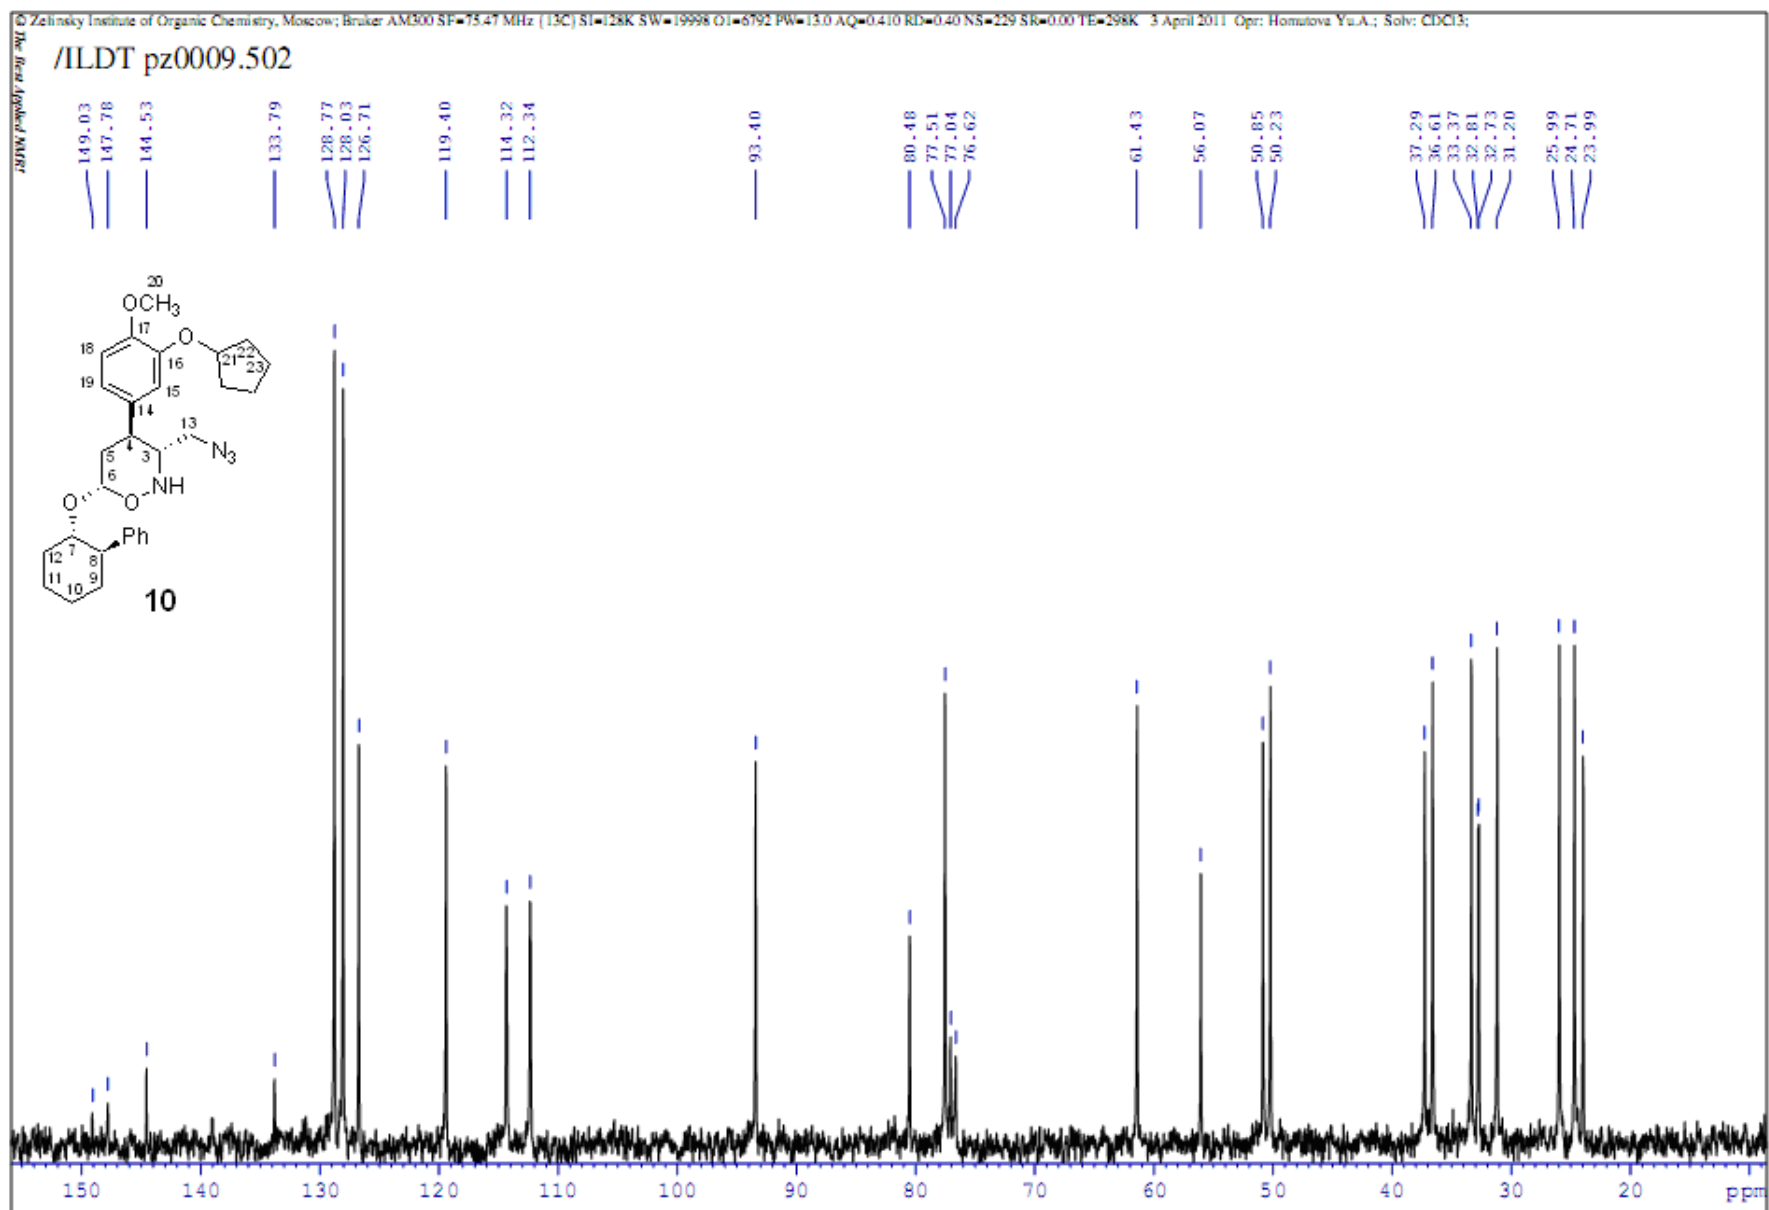

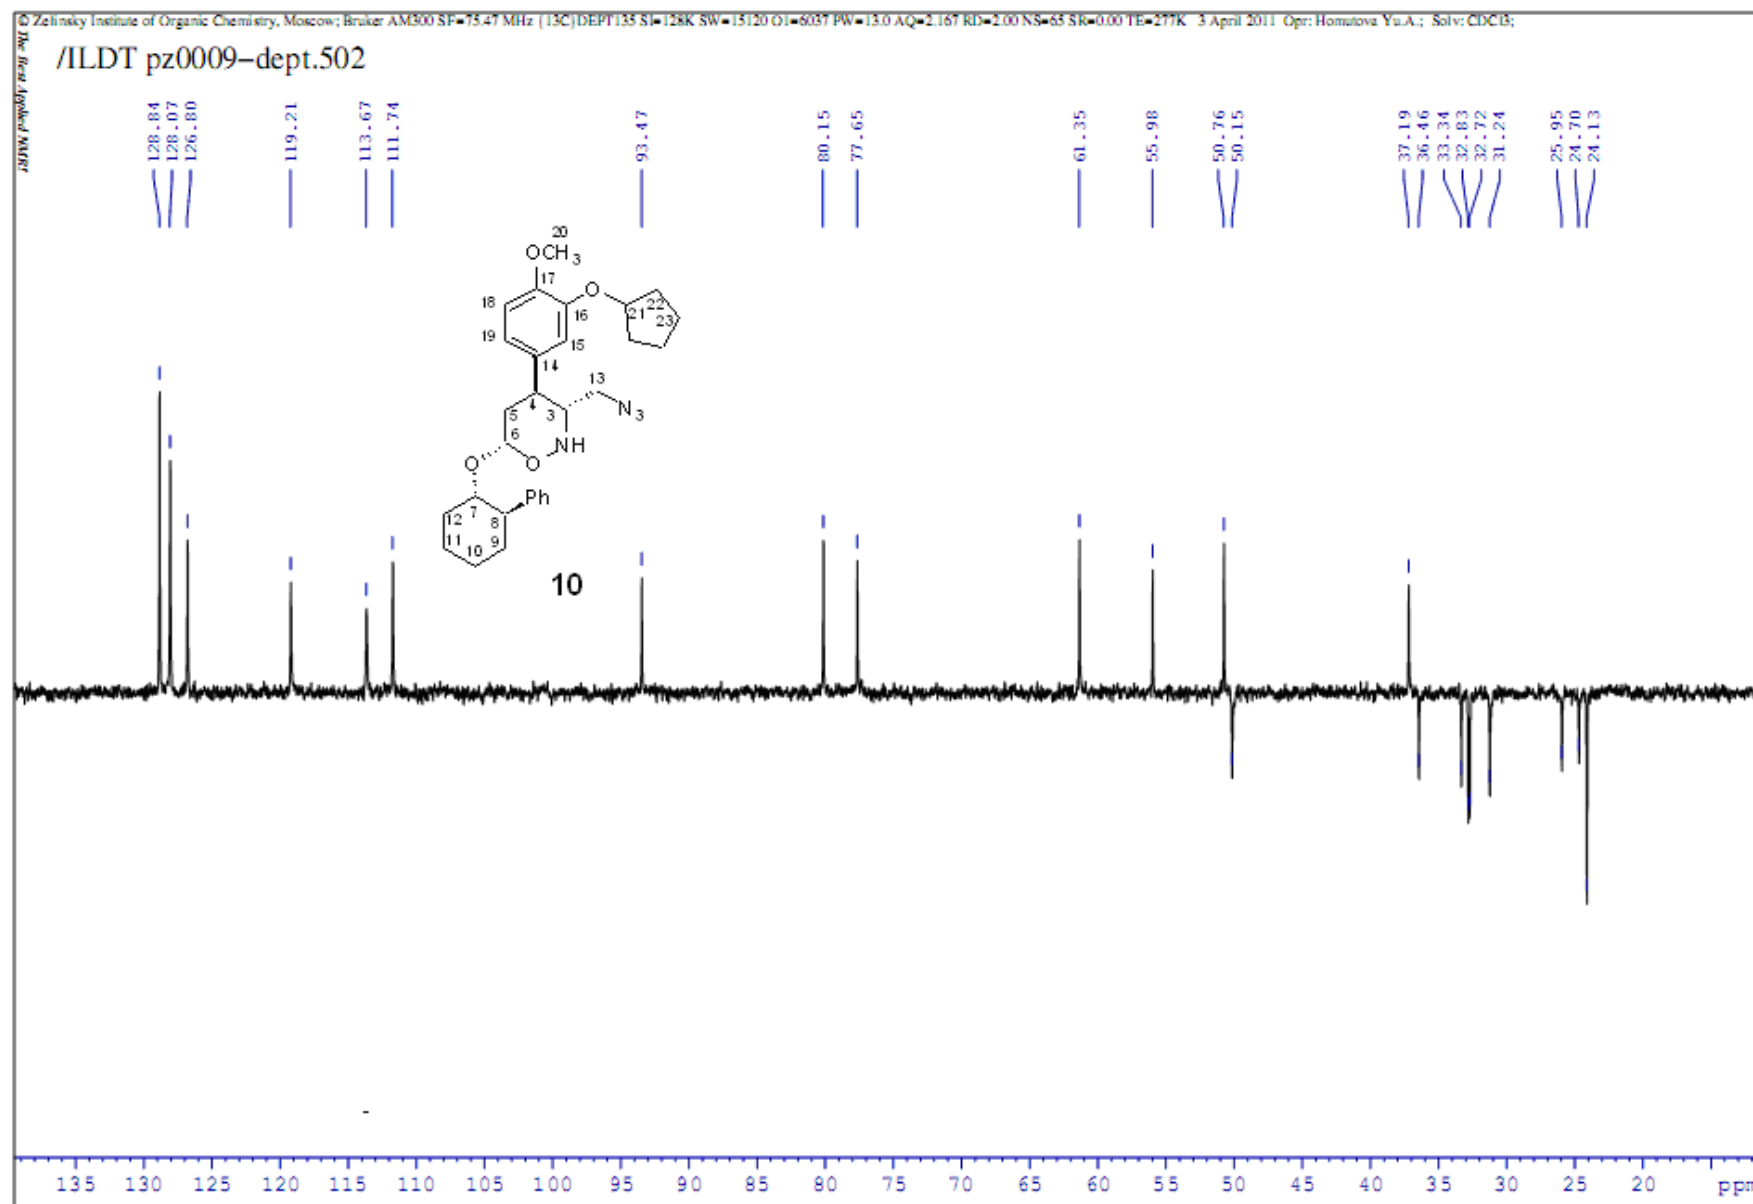

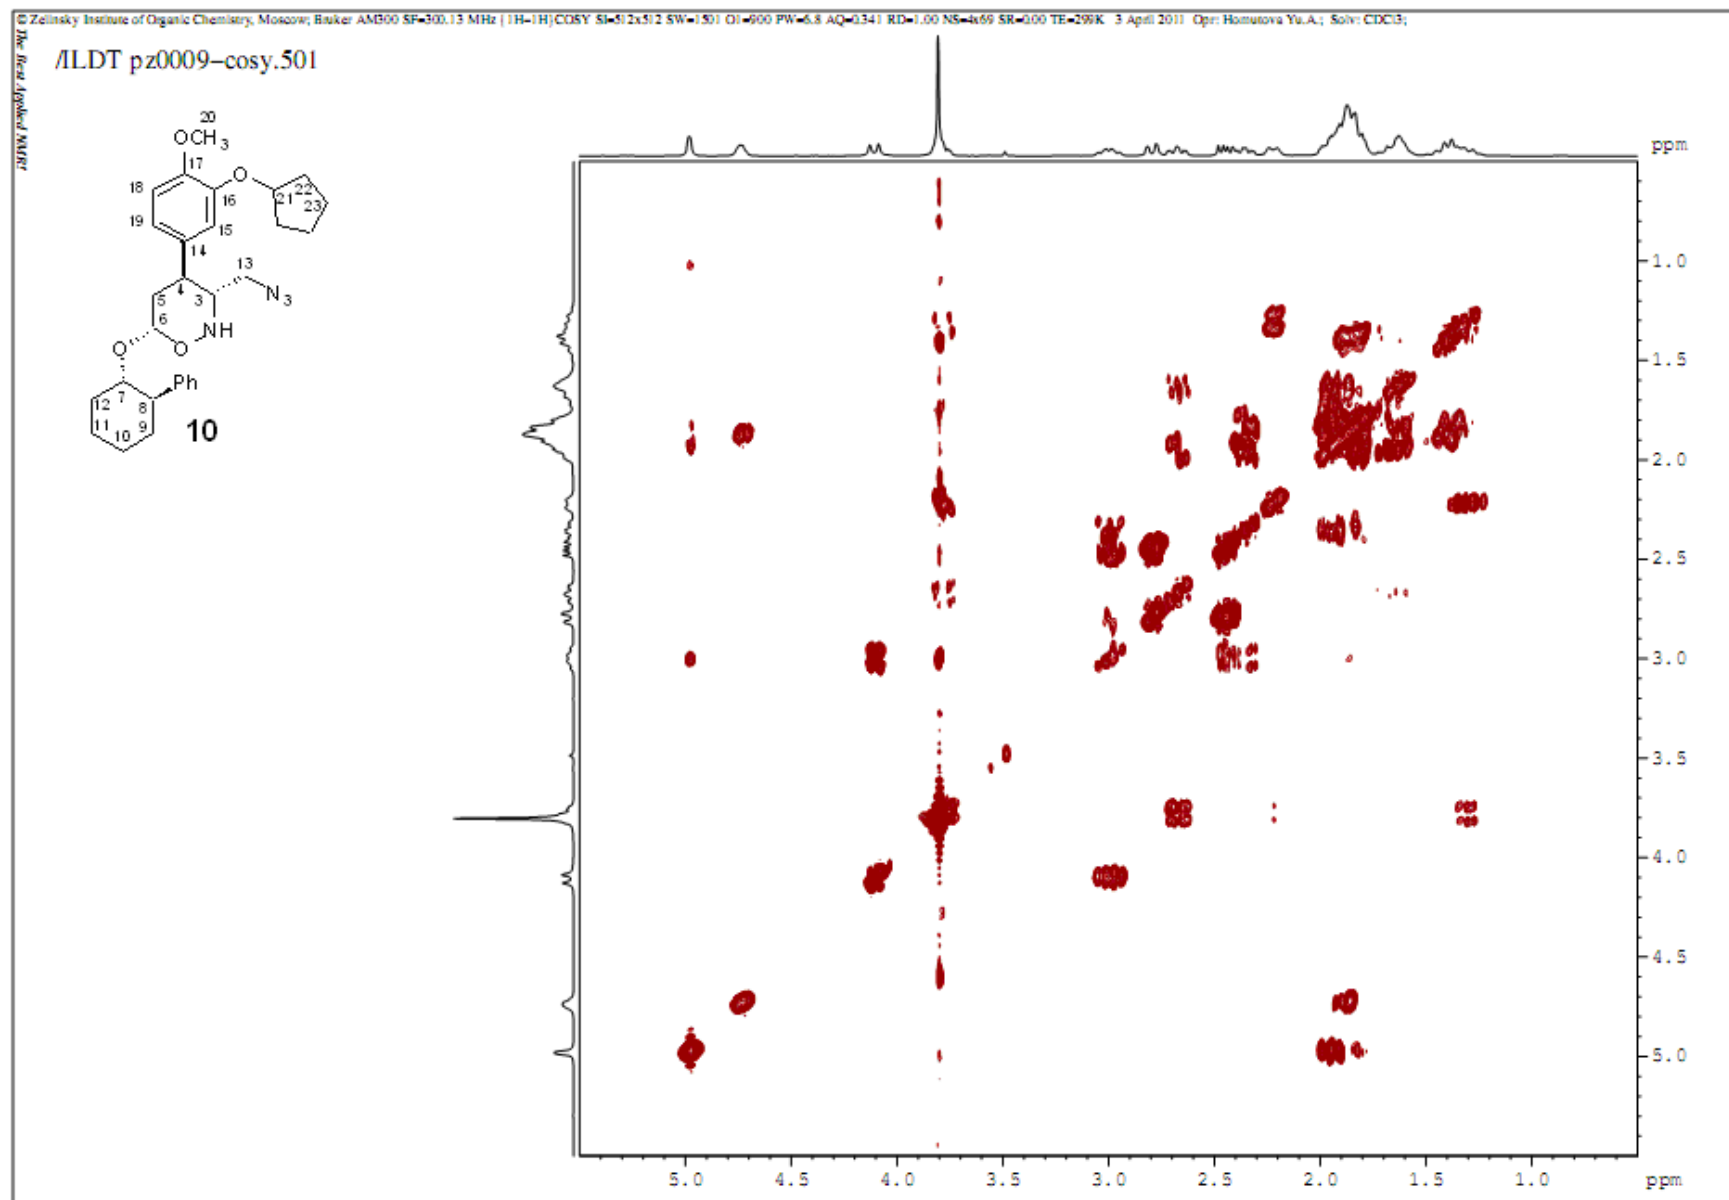

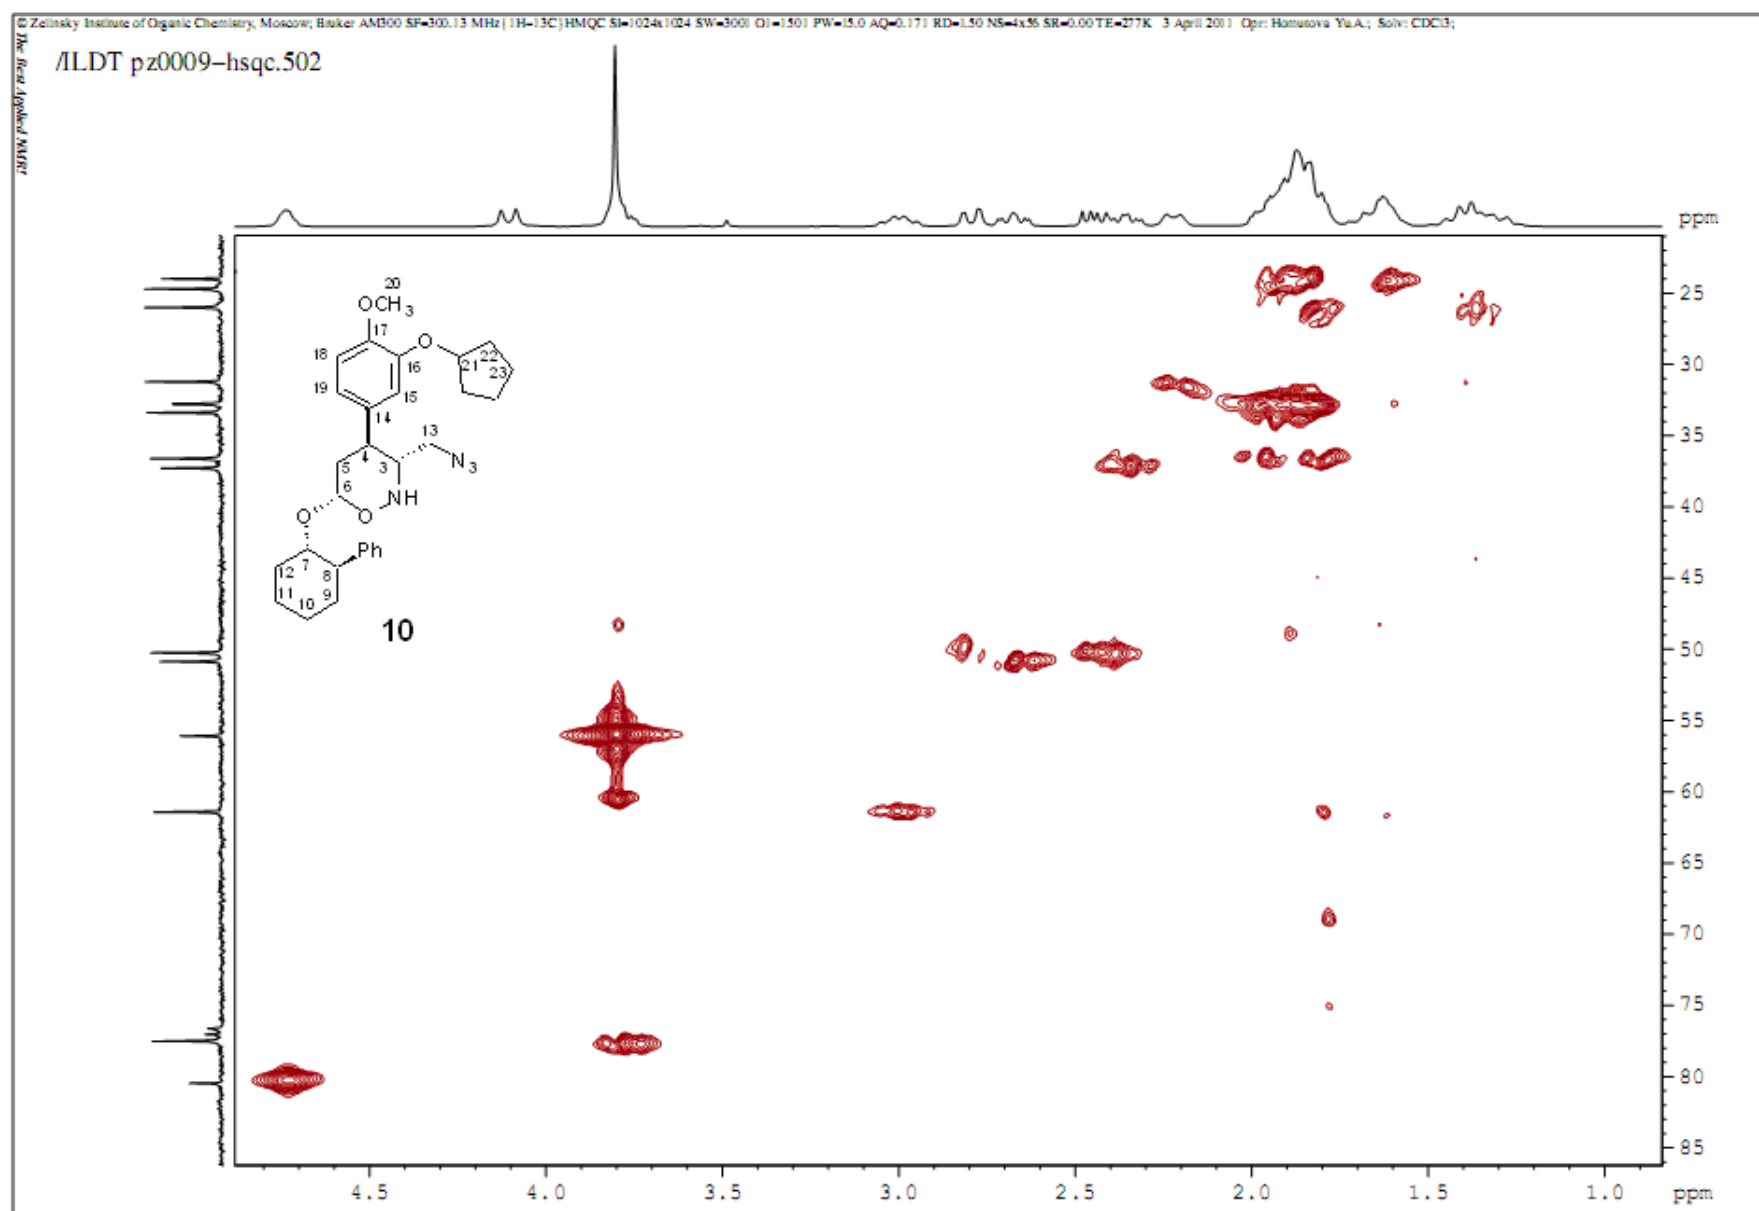

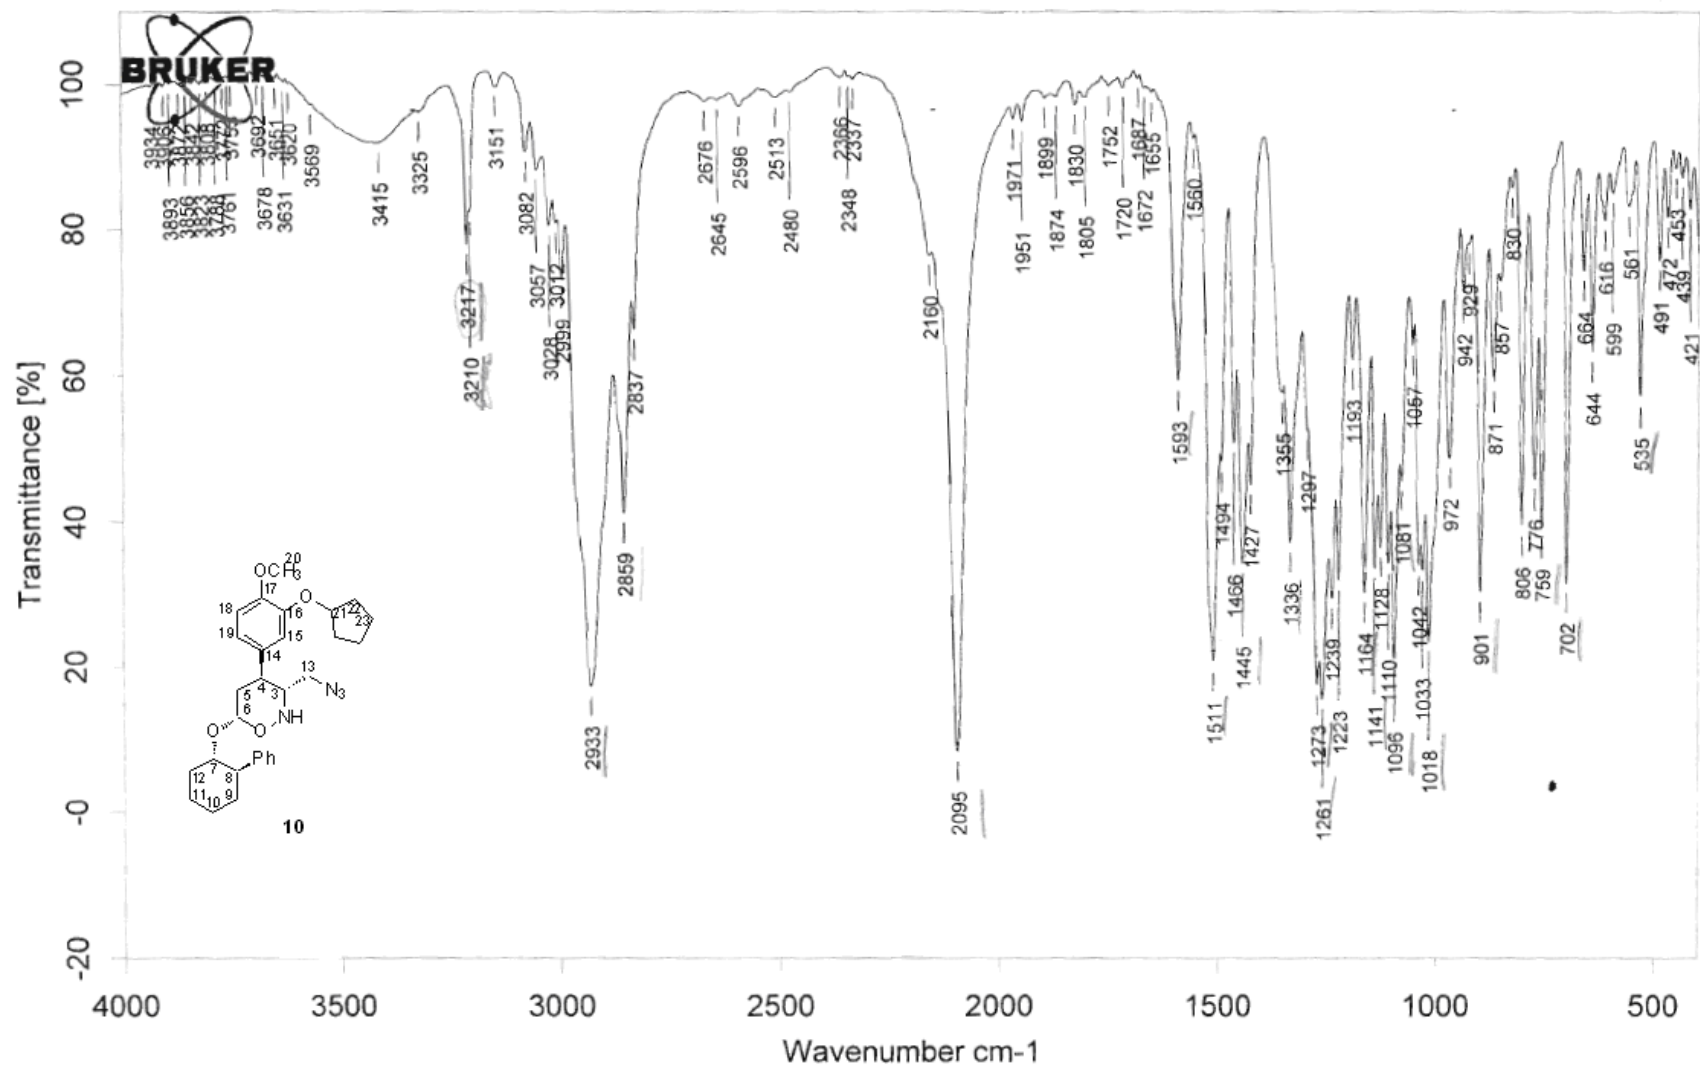

C:\Data\EDLPZ-009.0 SUHORUKOV. PZ-009 , press.KBr, 1/200.

20/04/2012

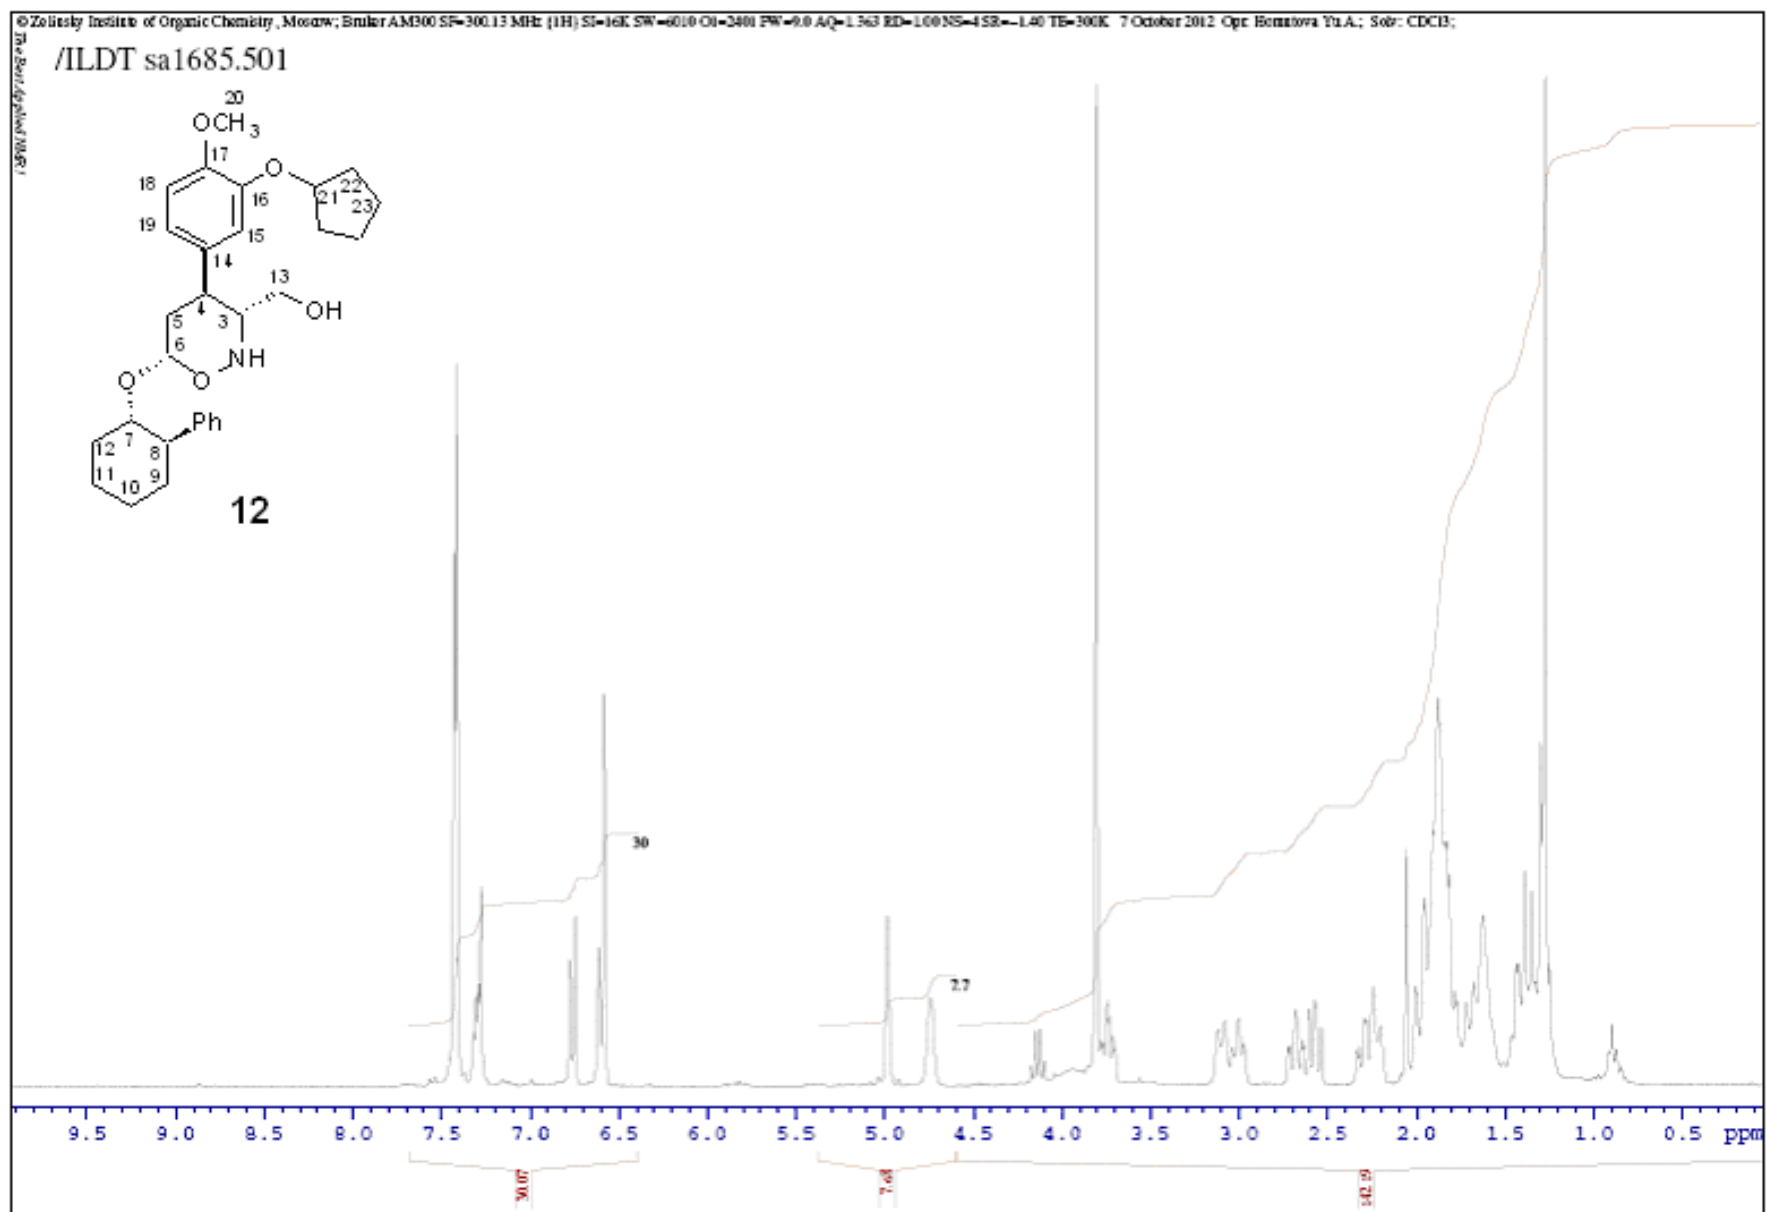

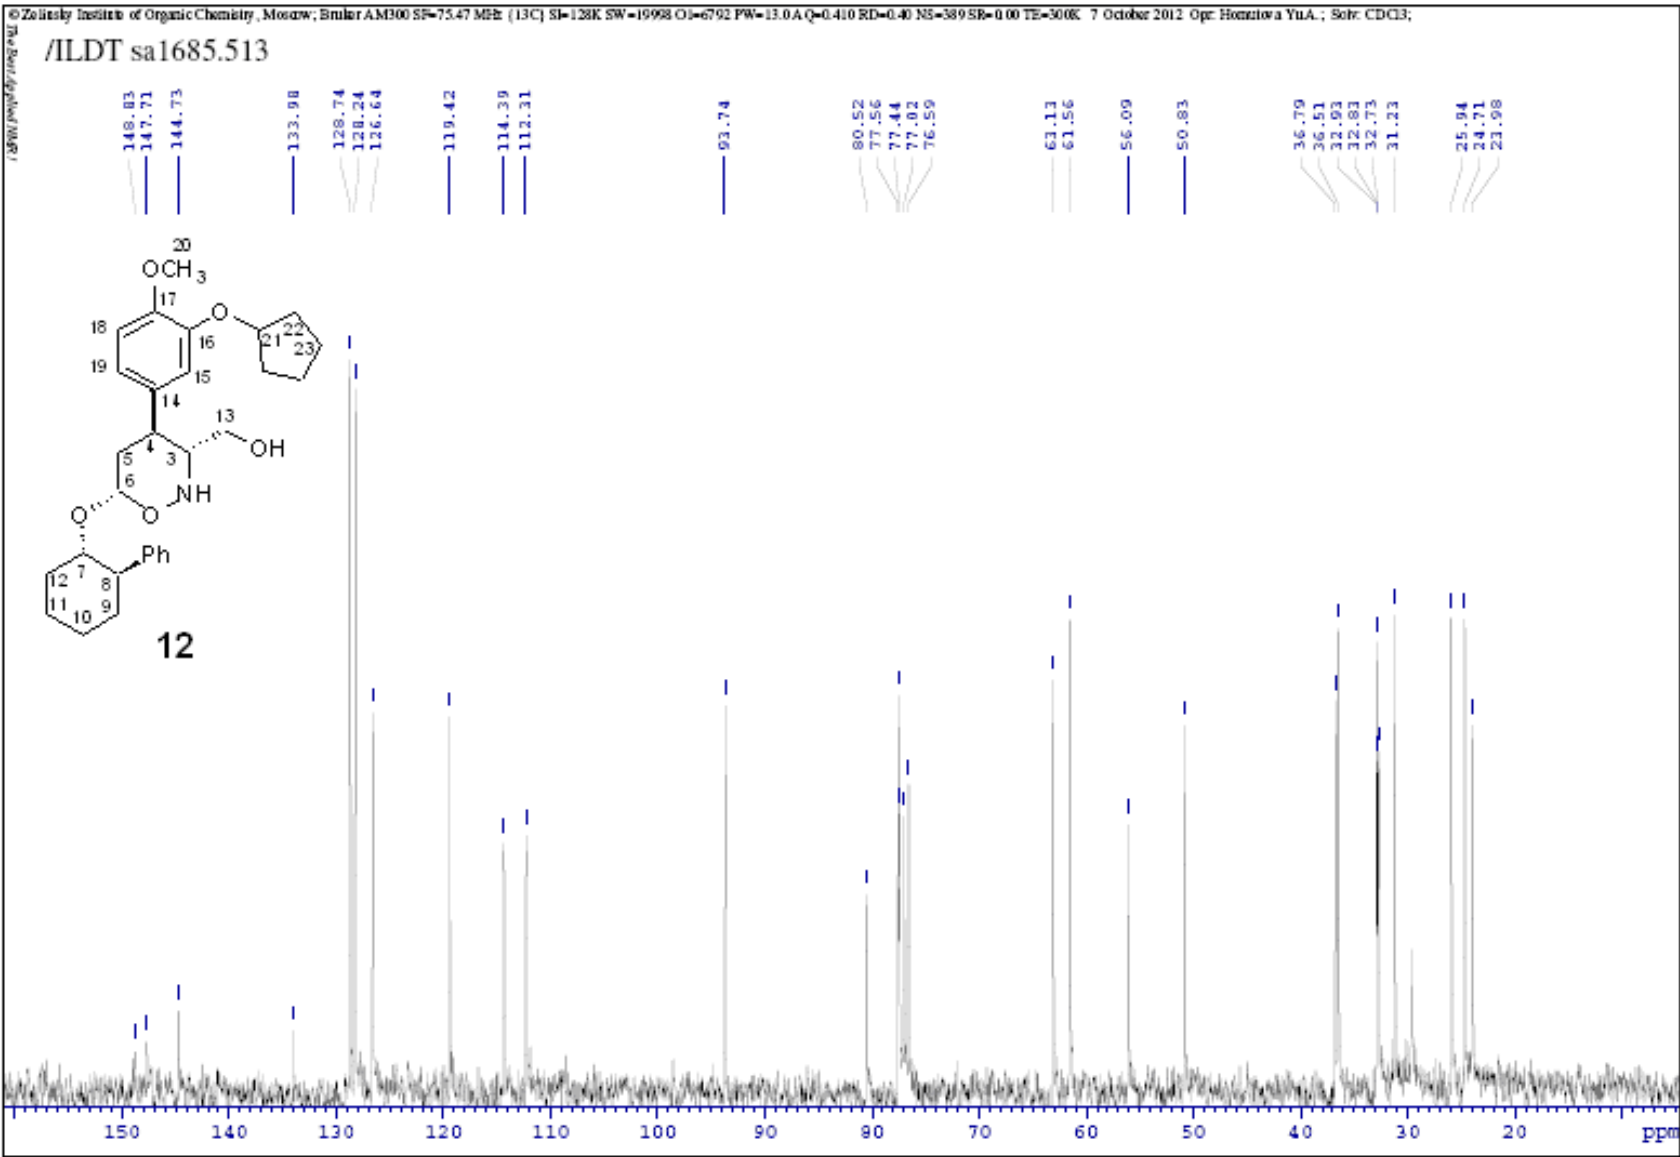



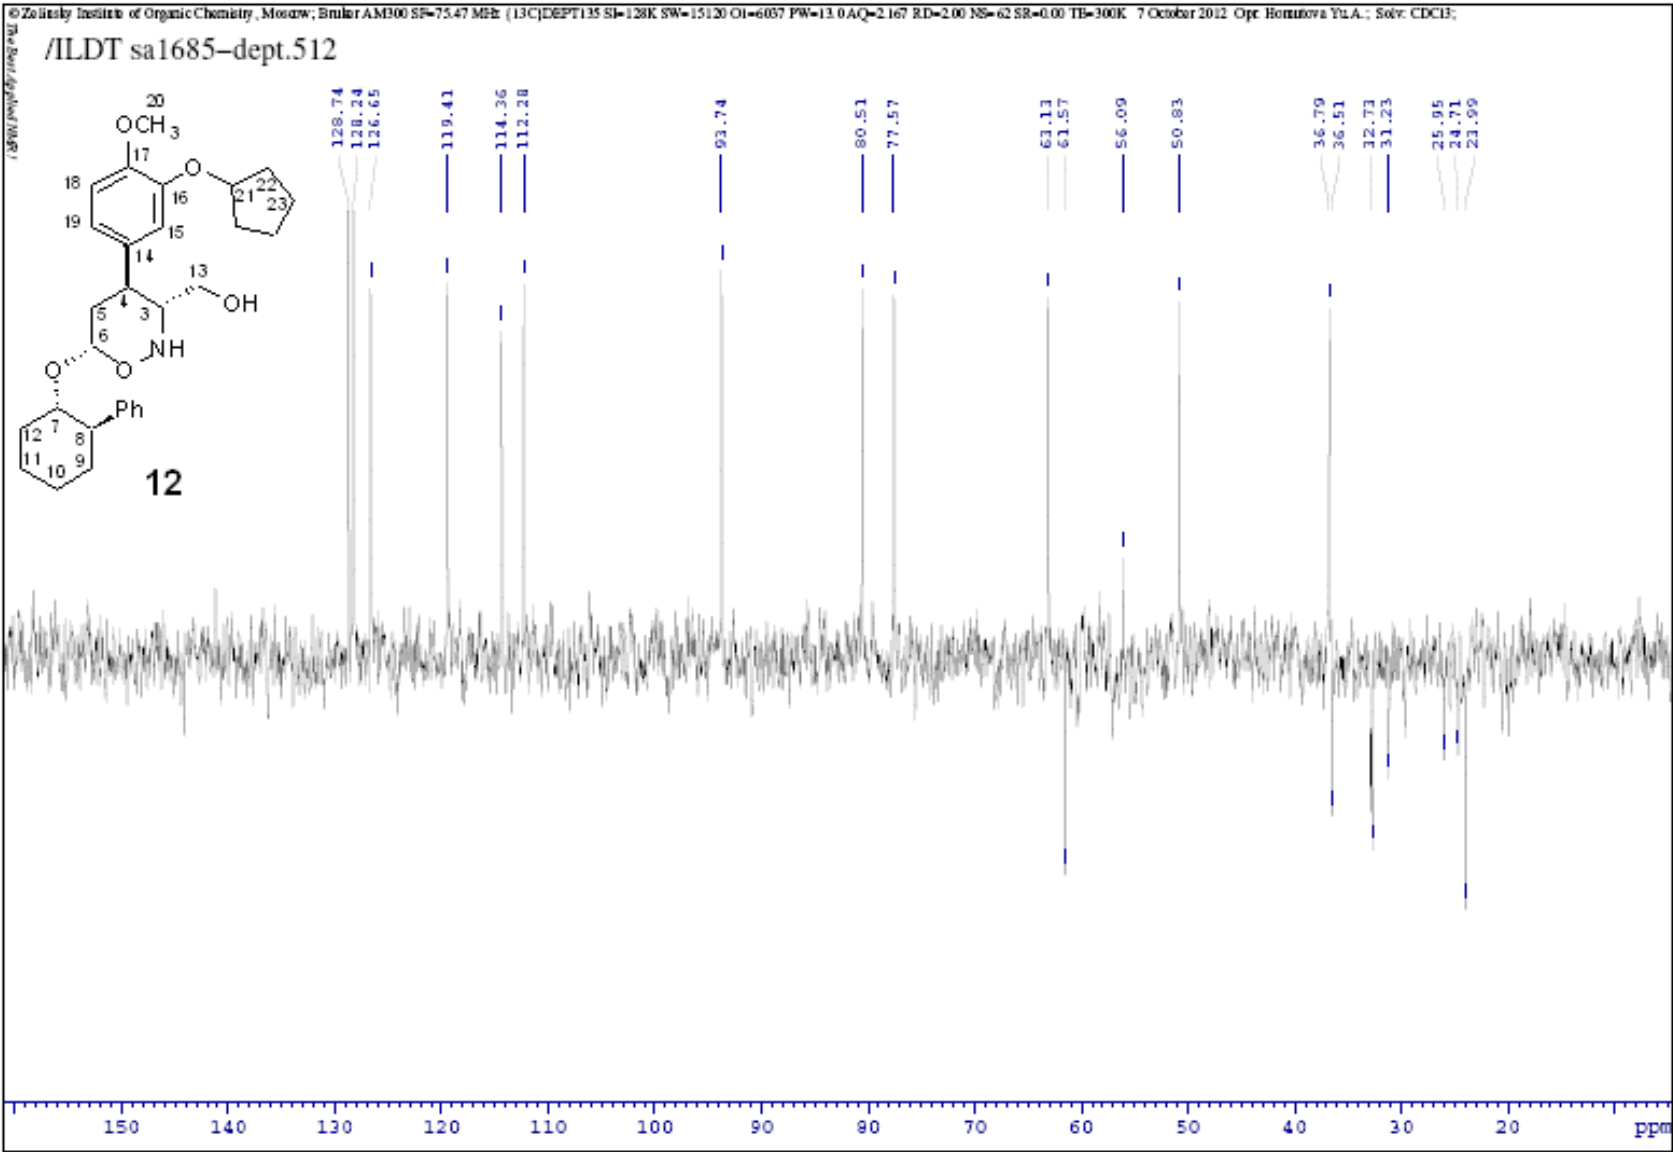

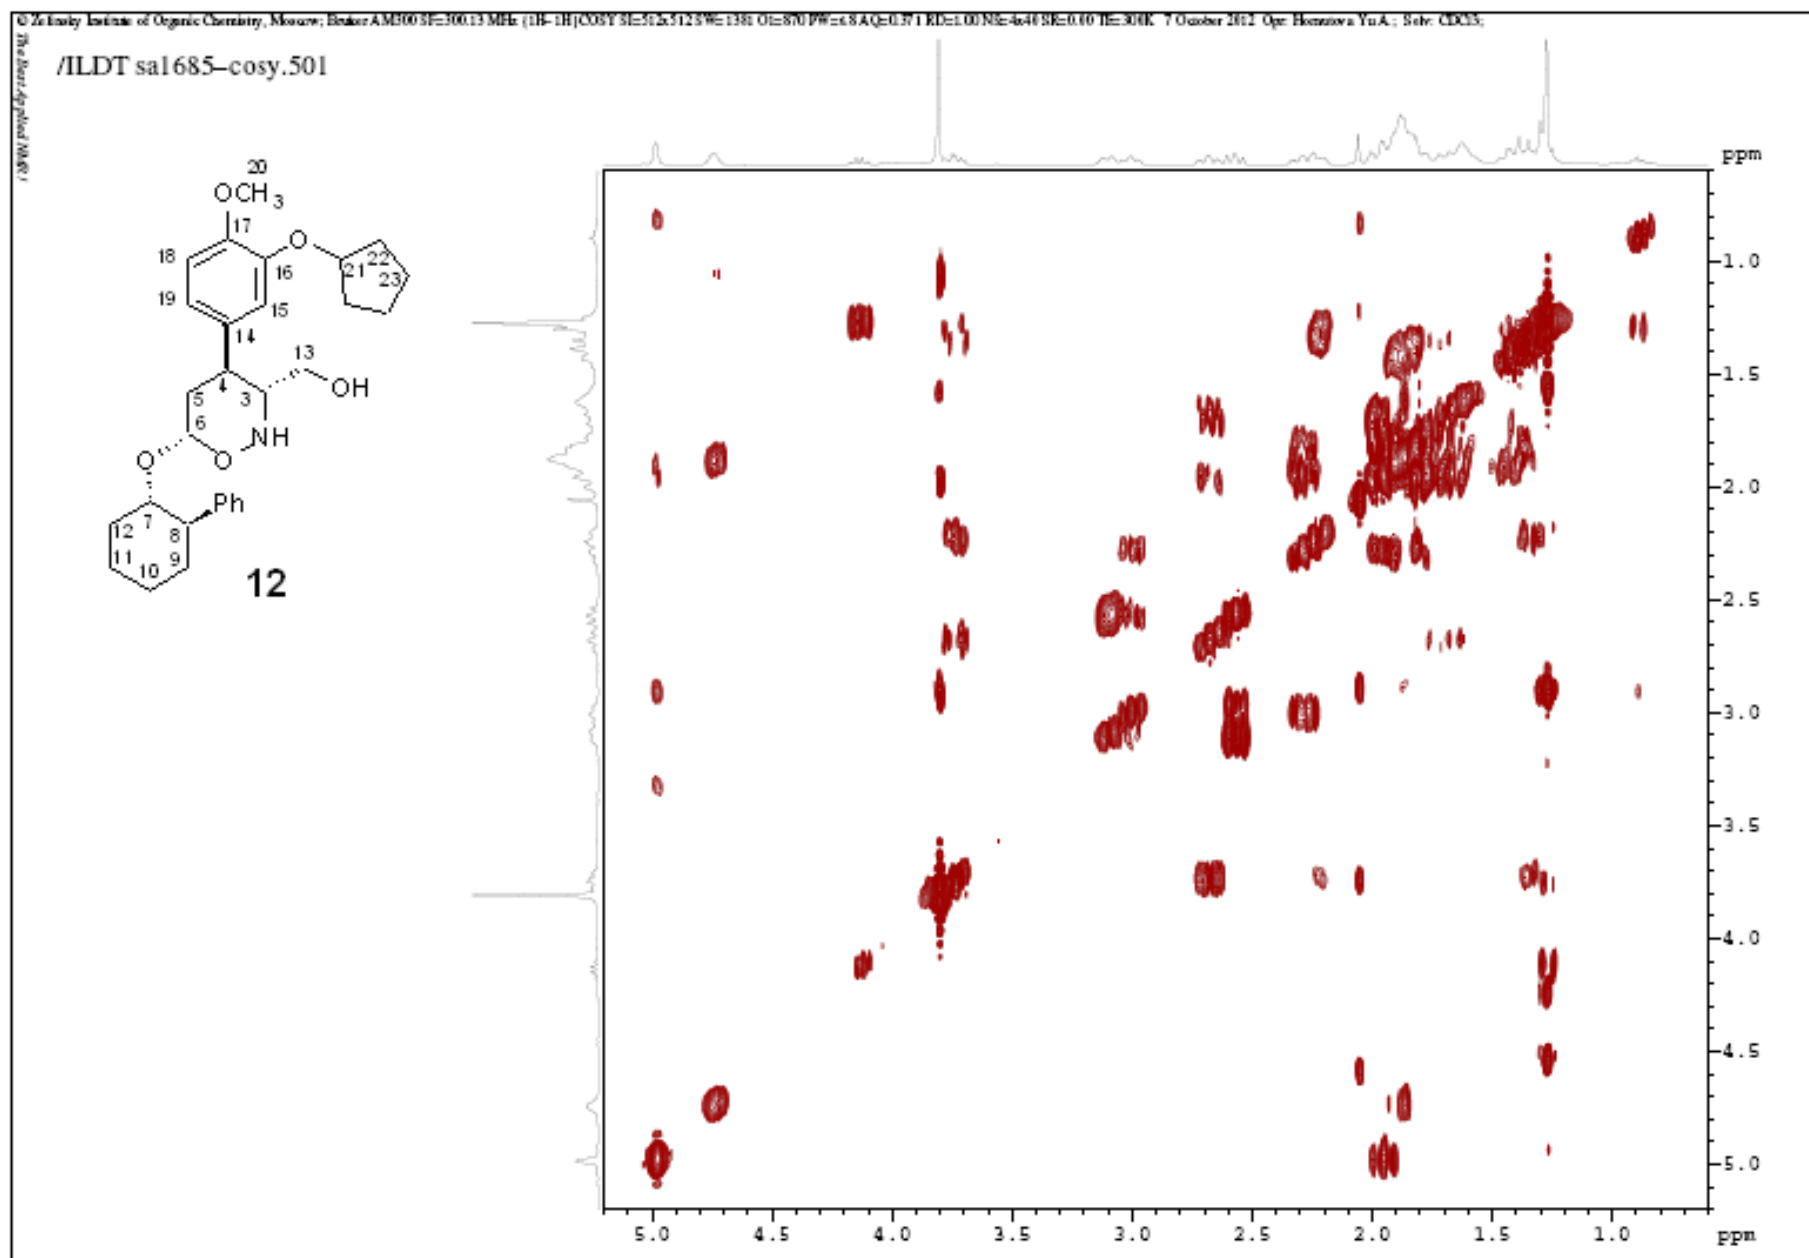

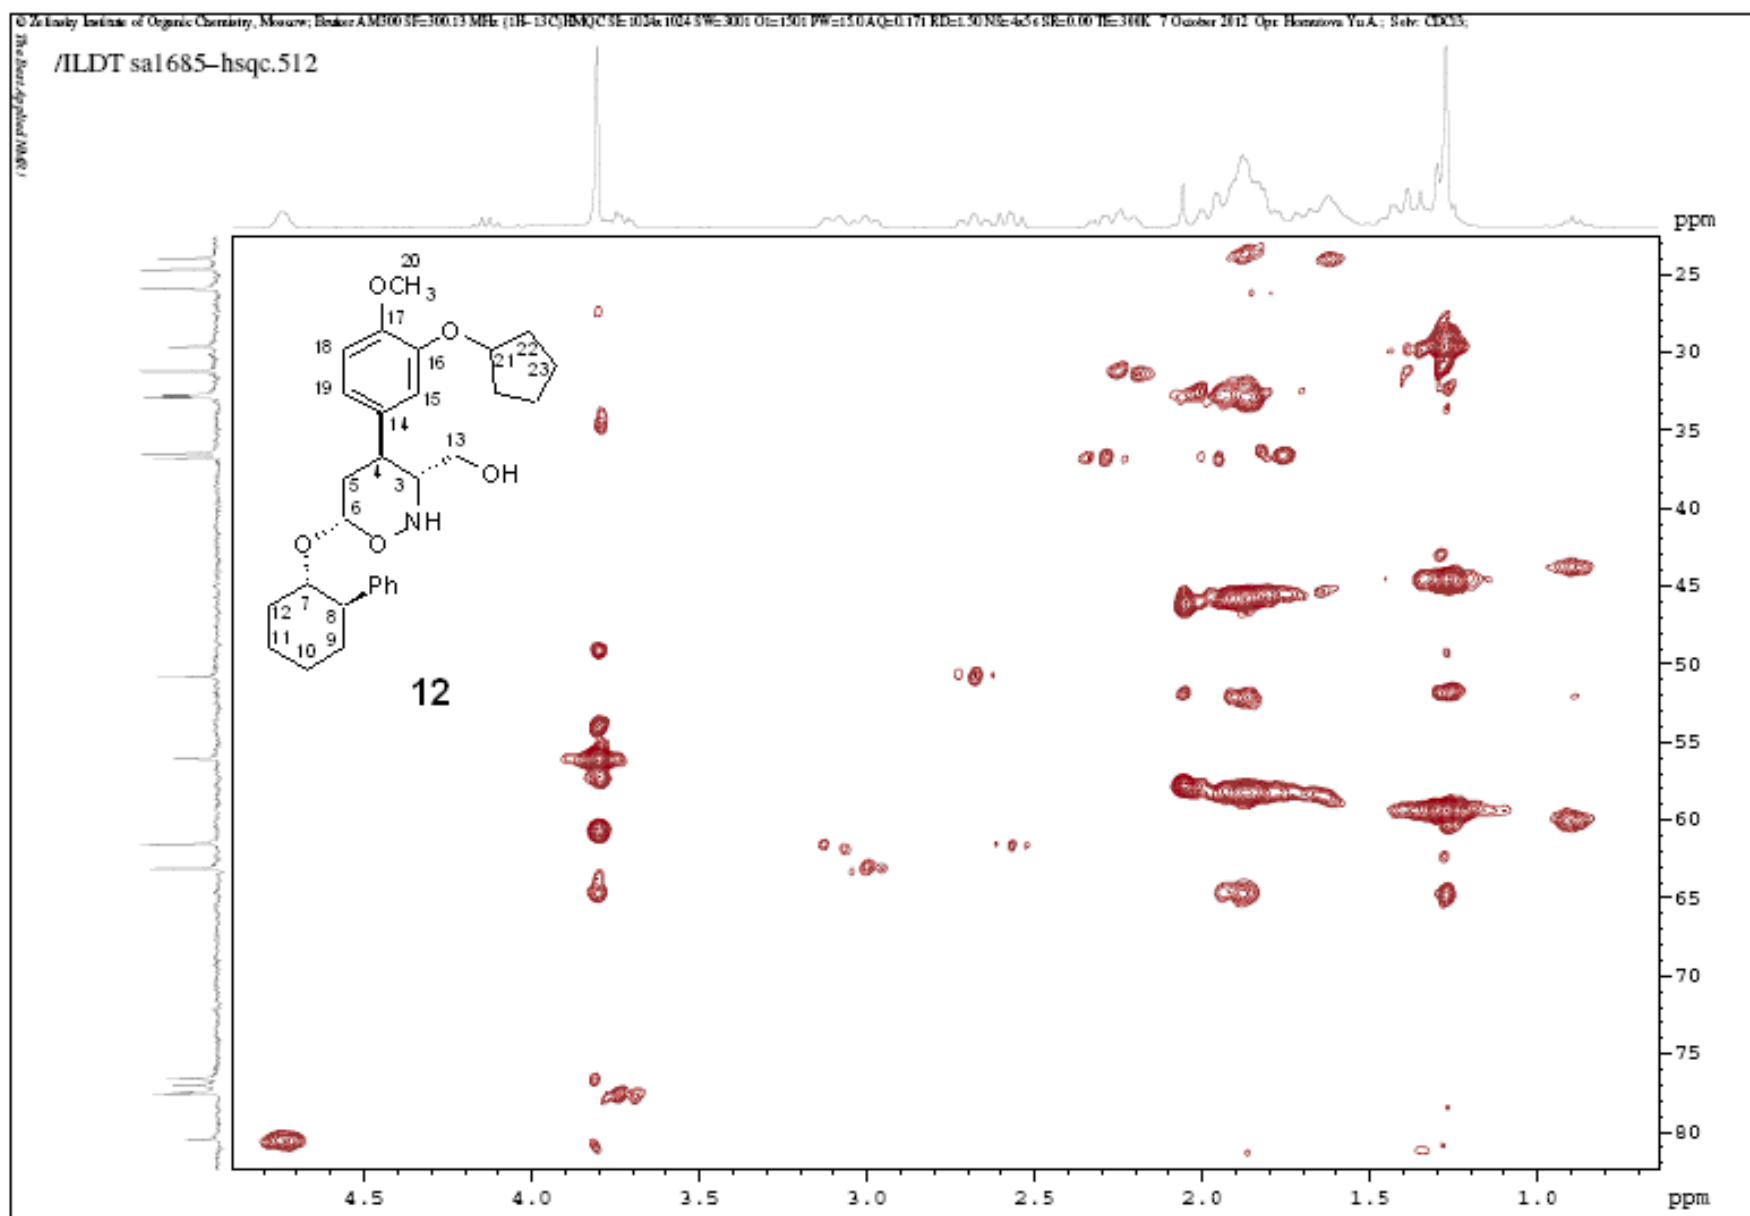

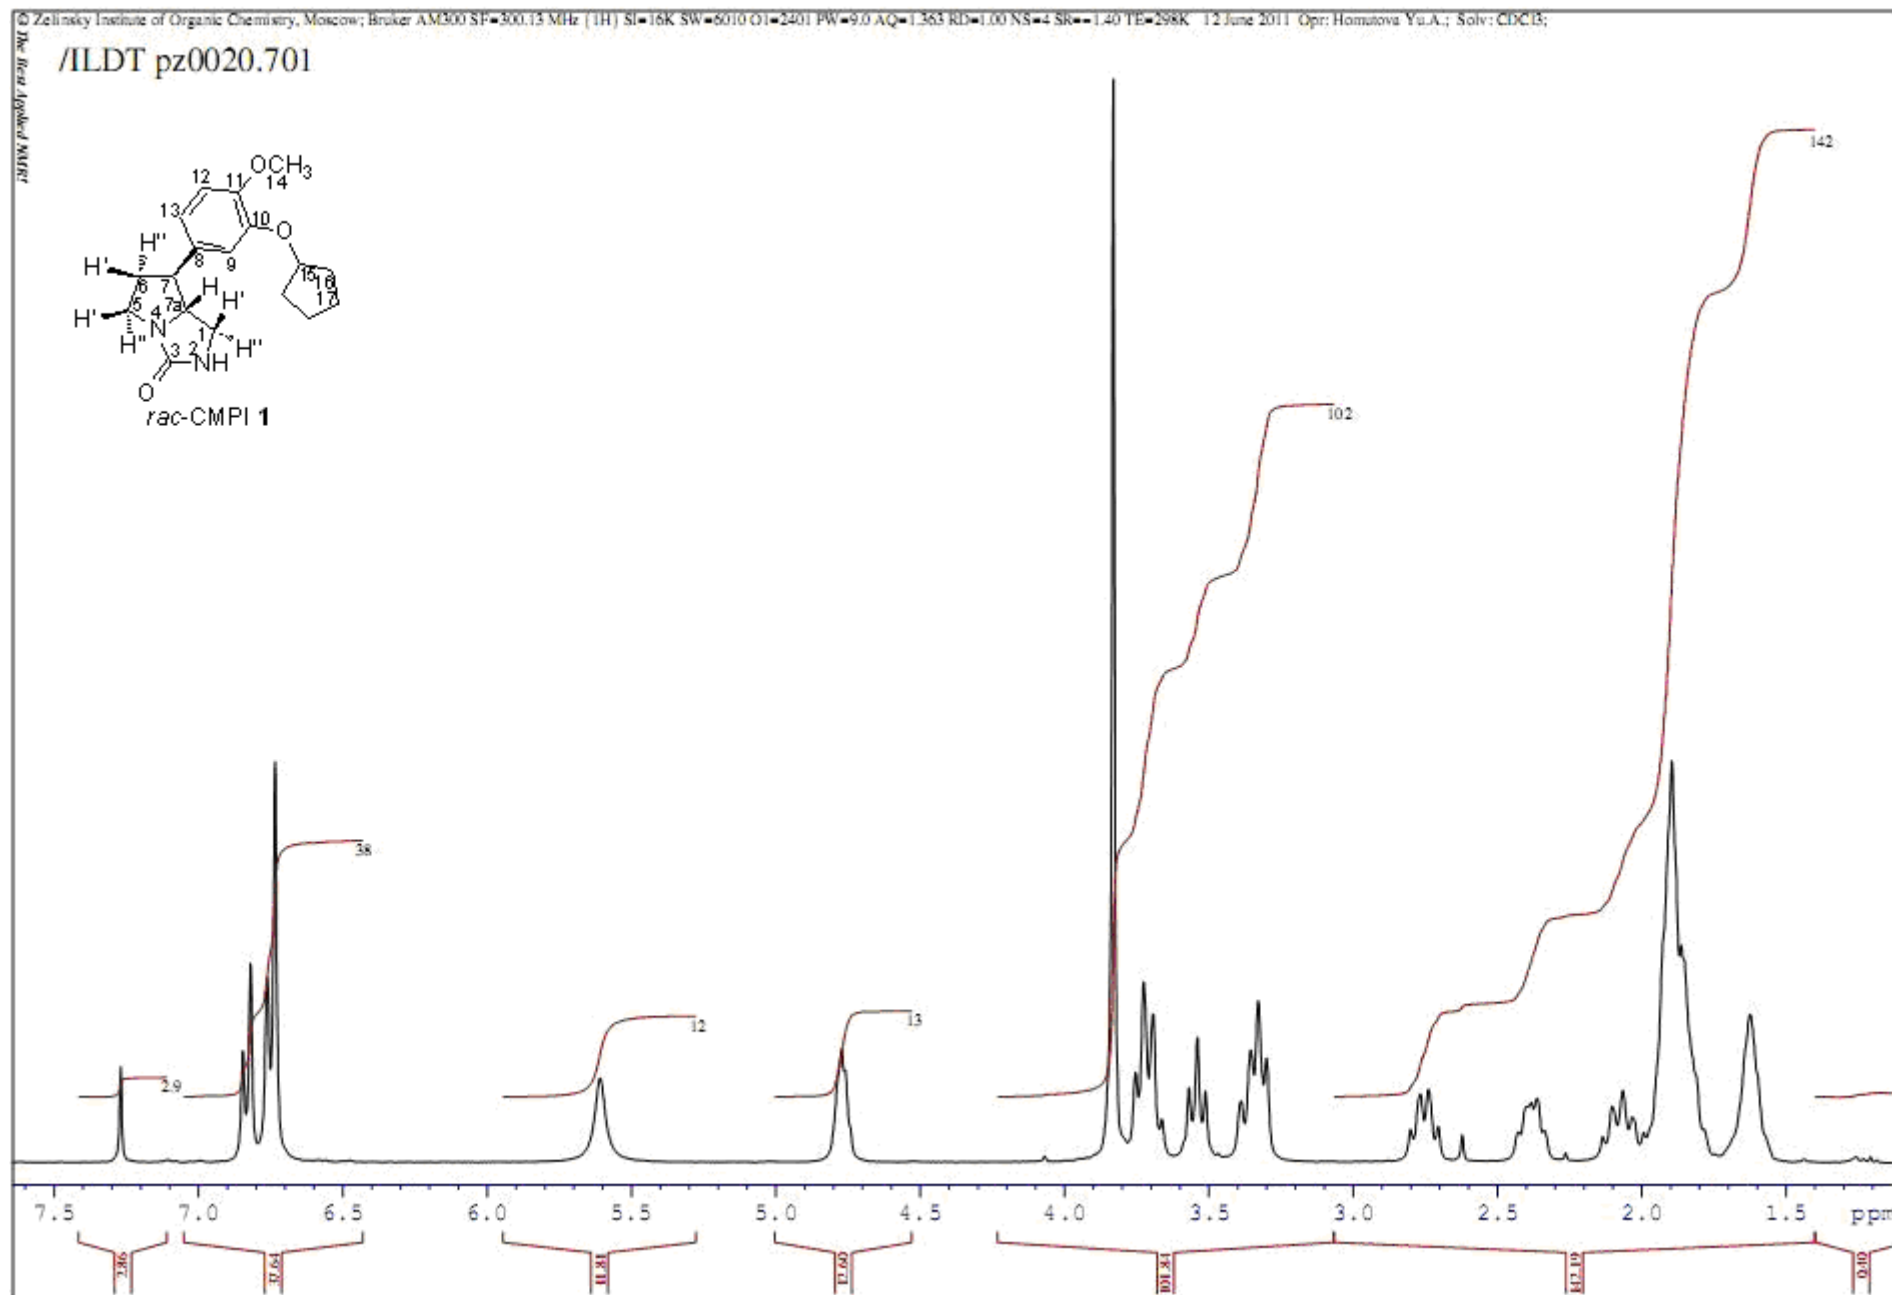

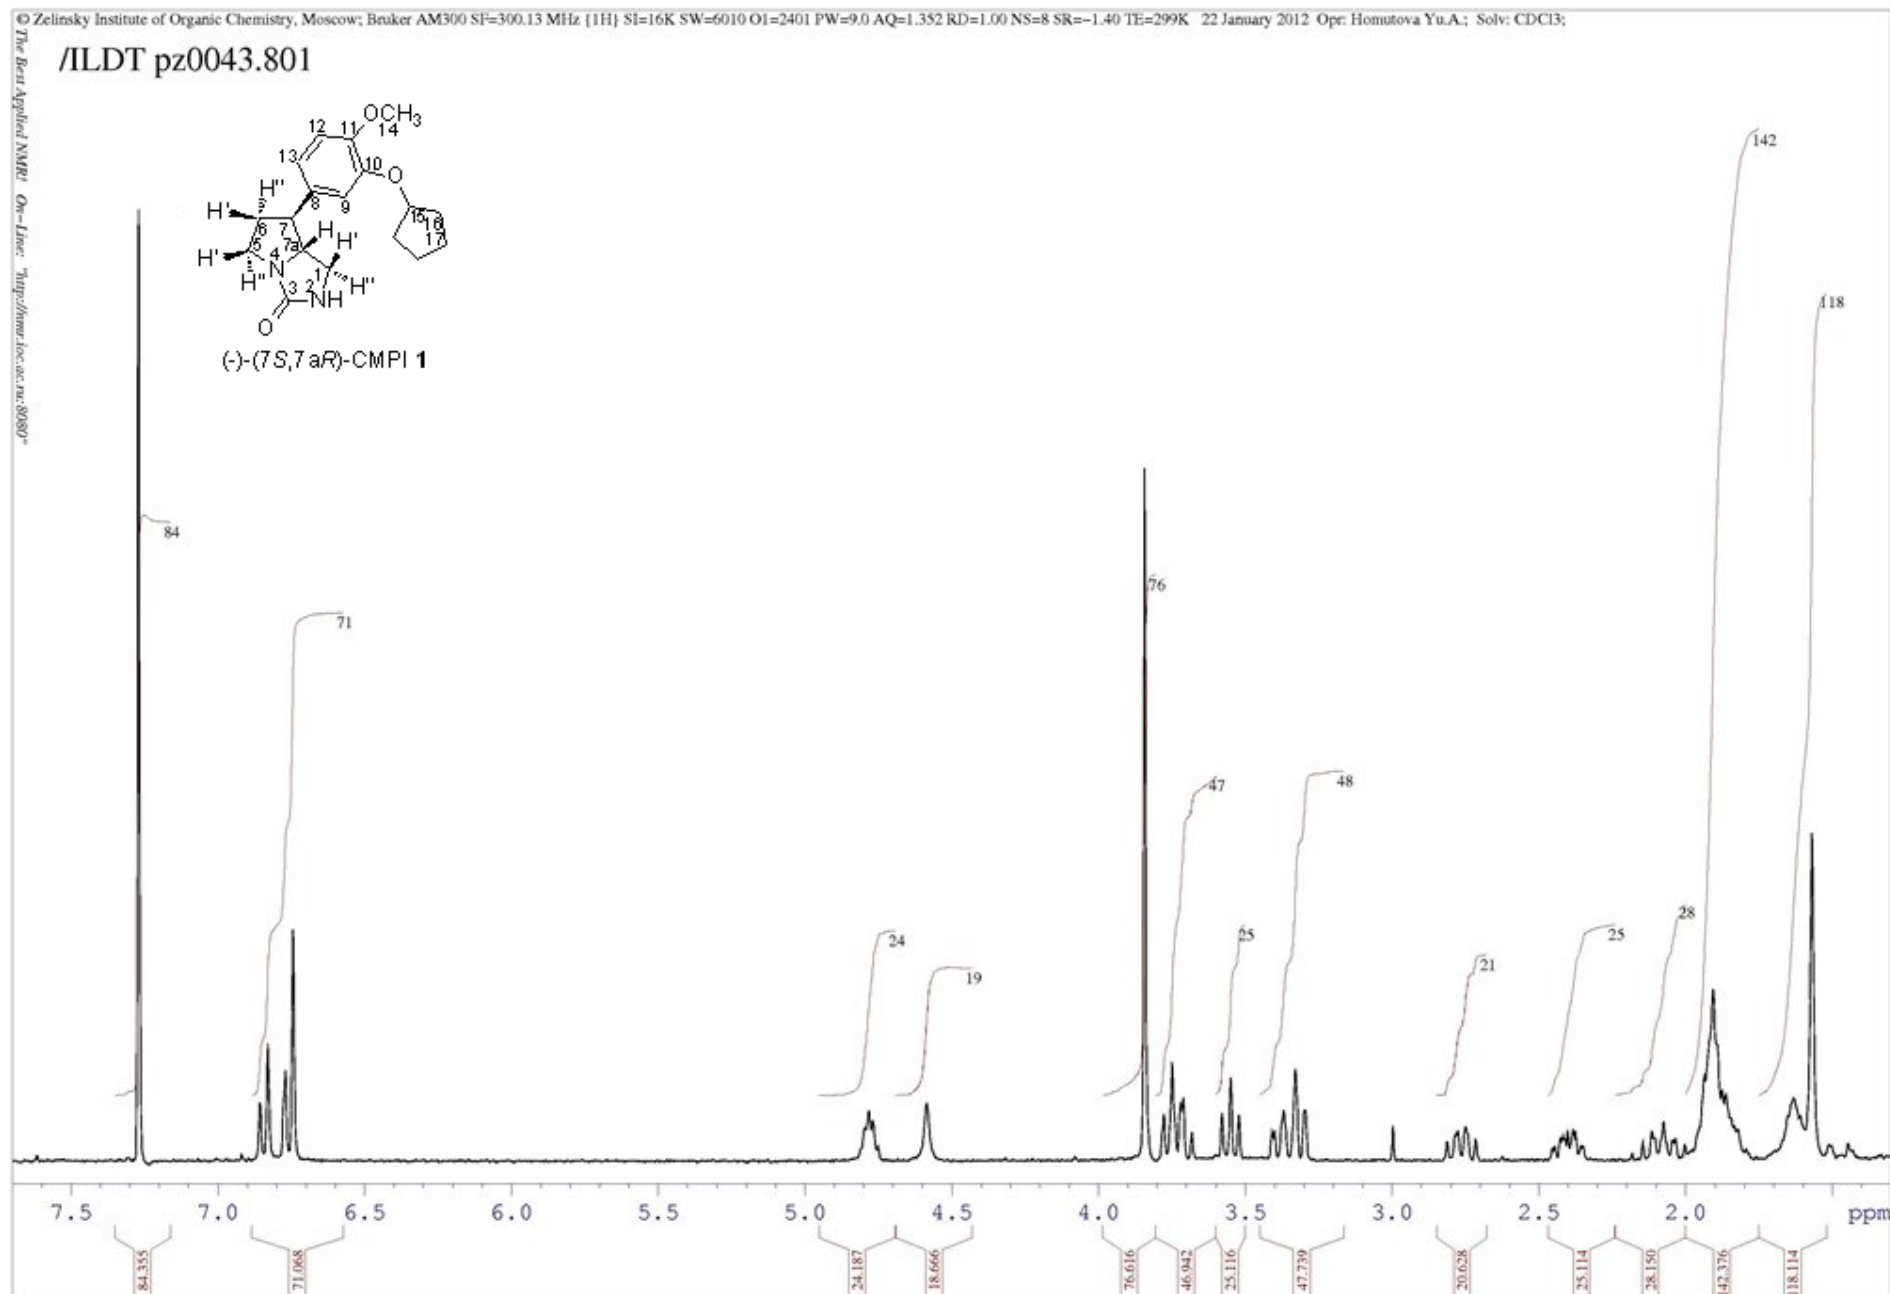

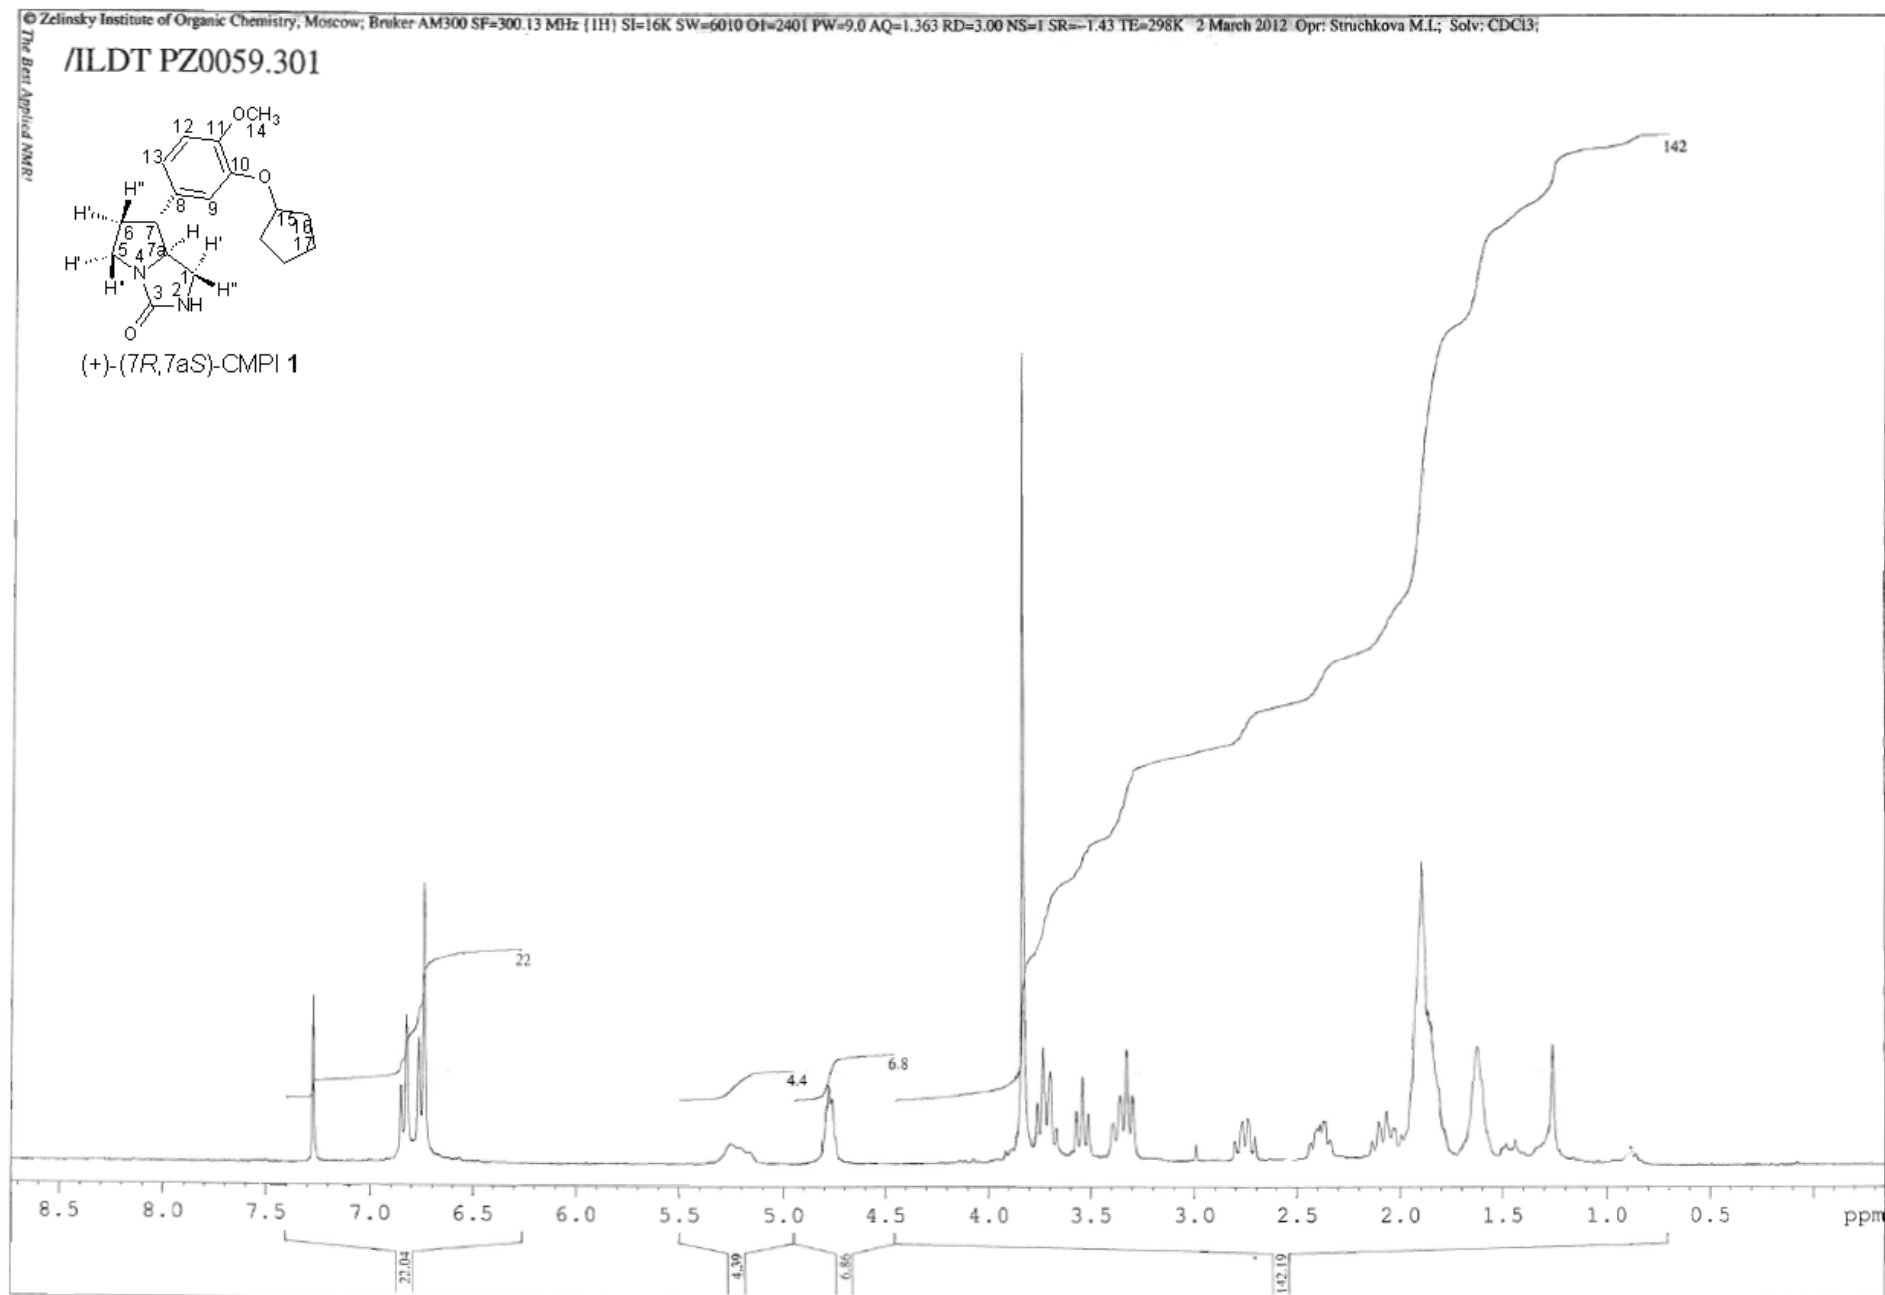

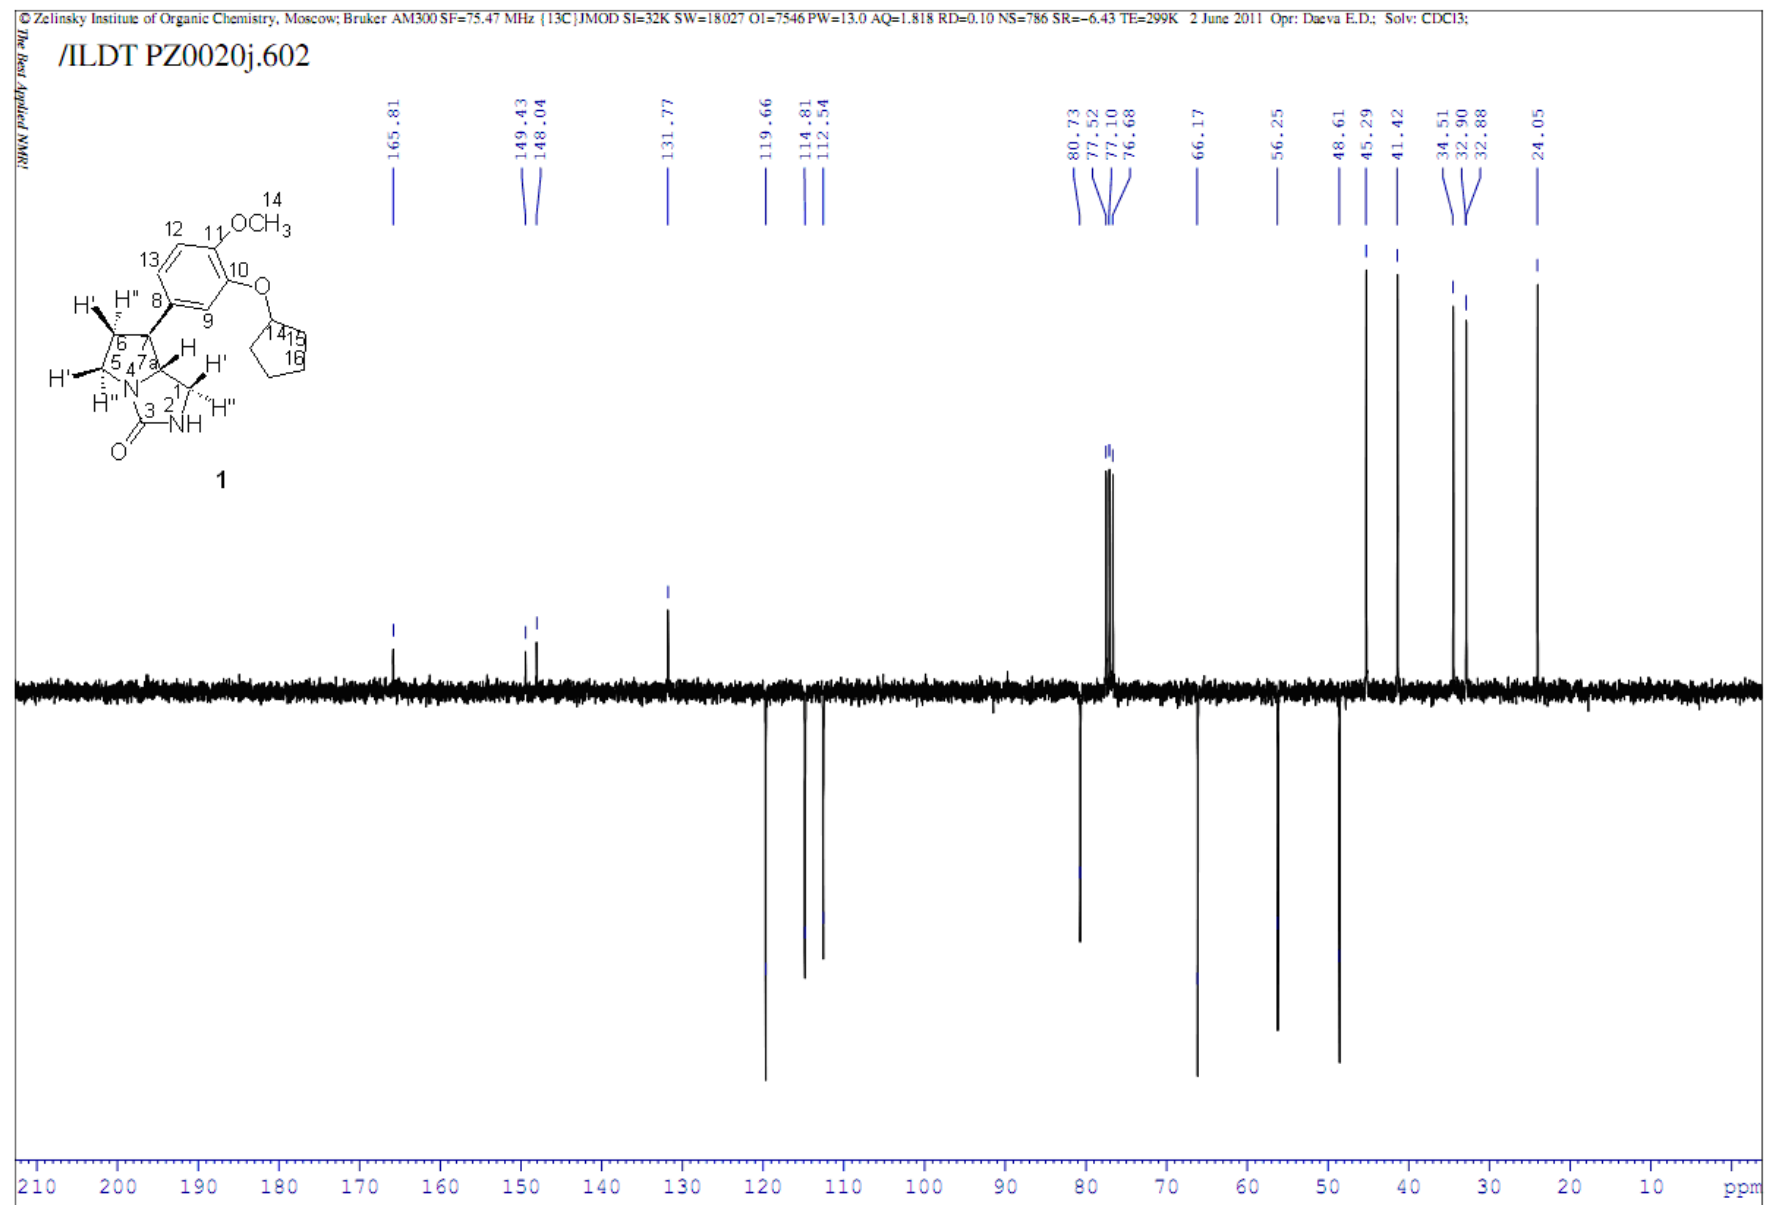

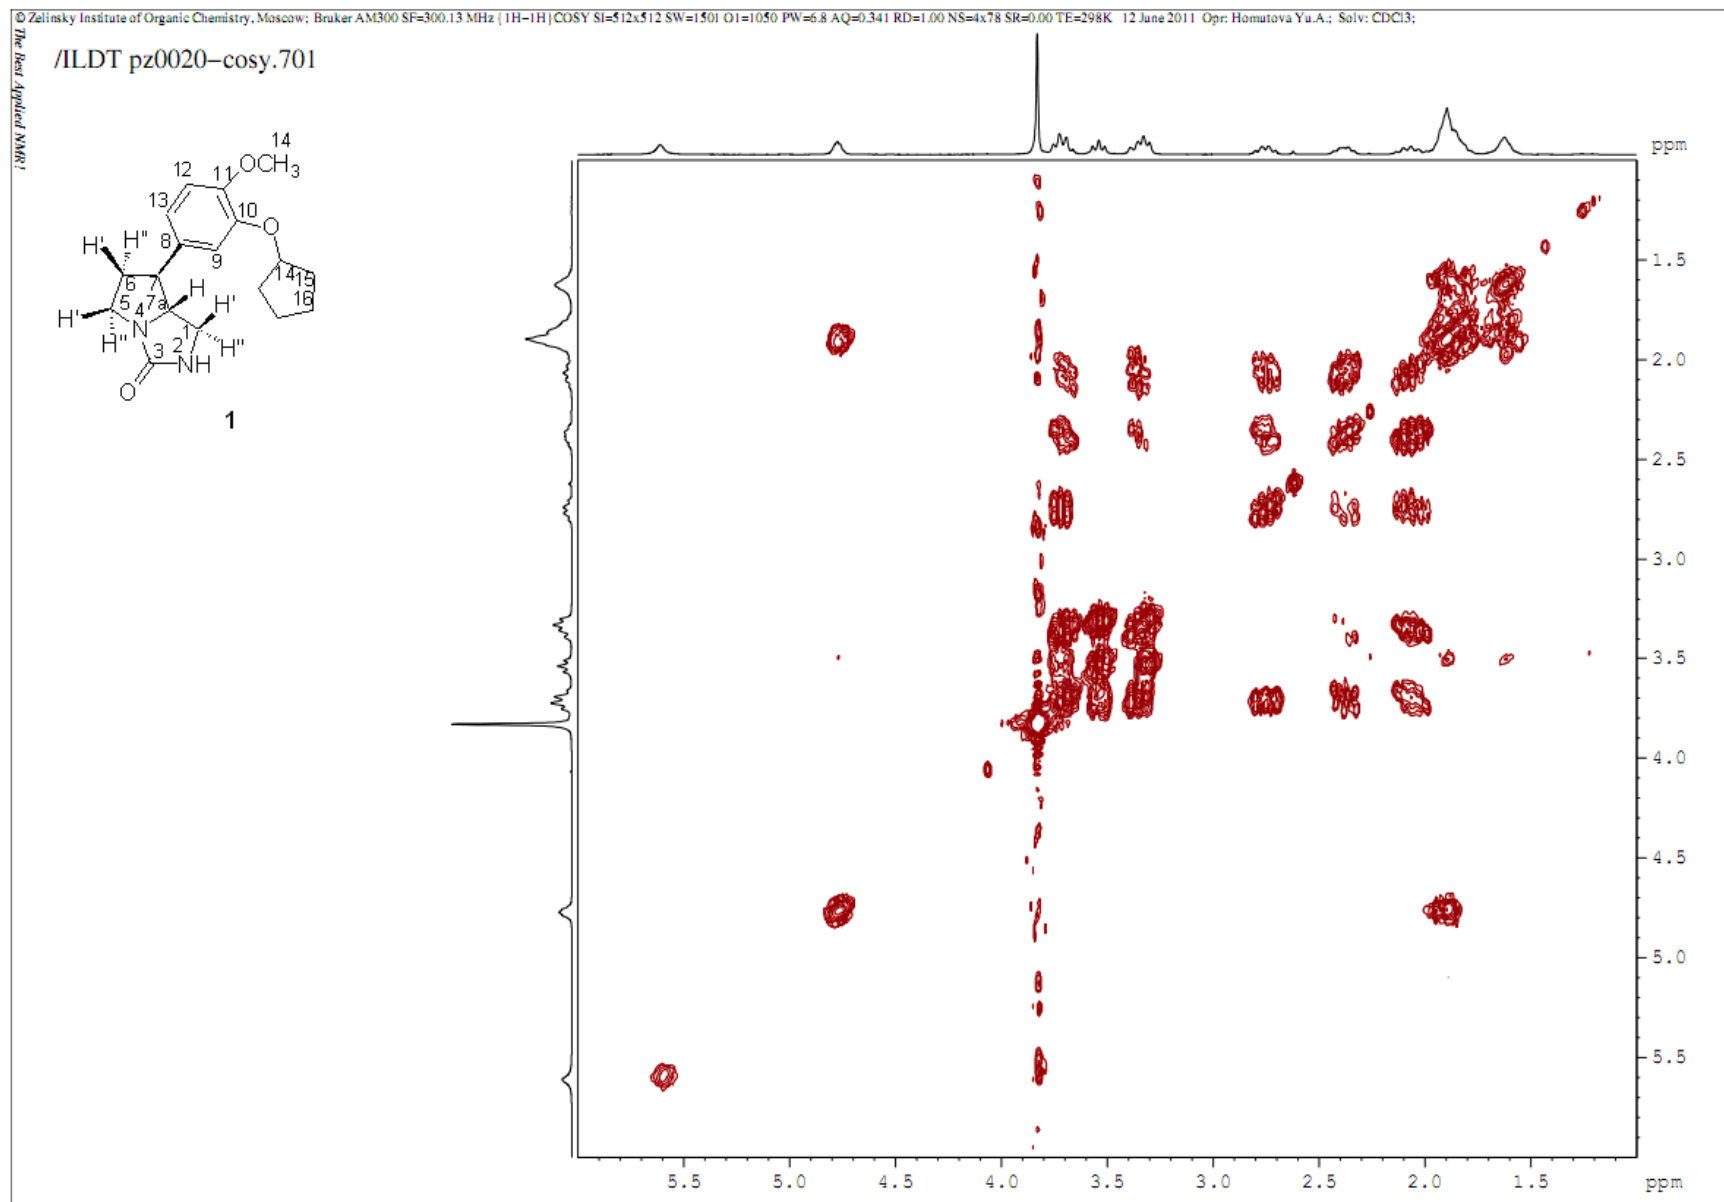



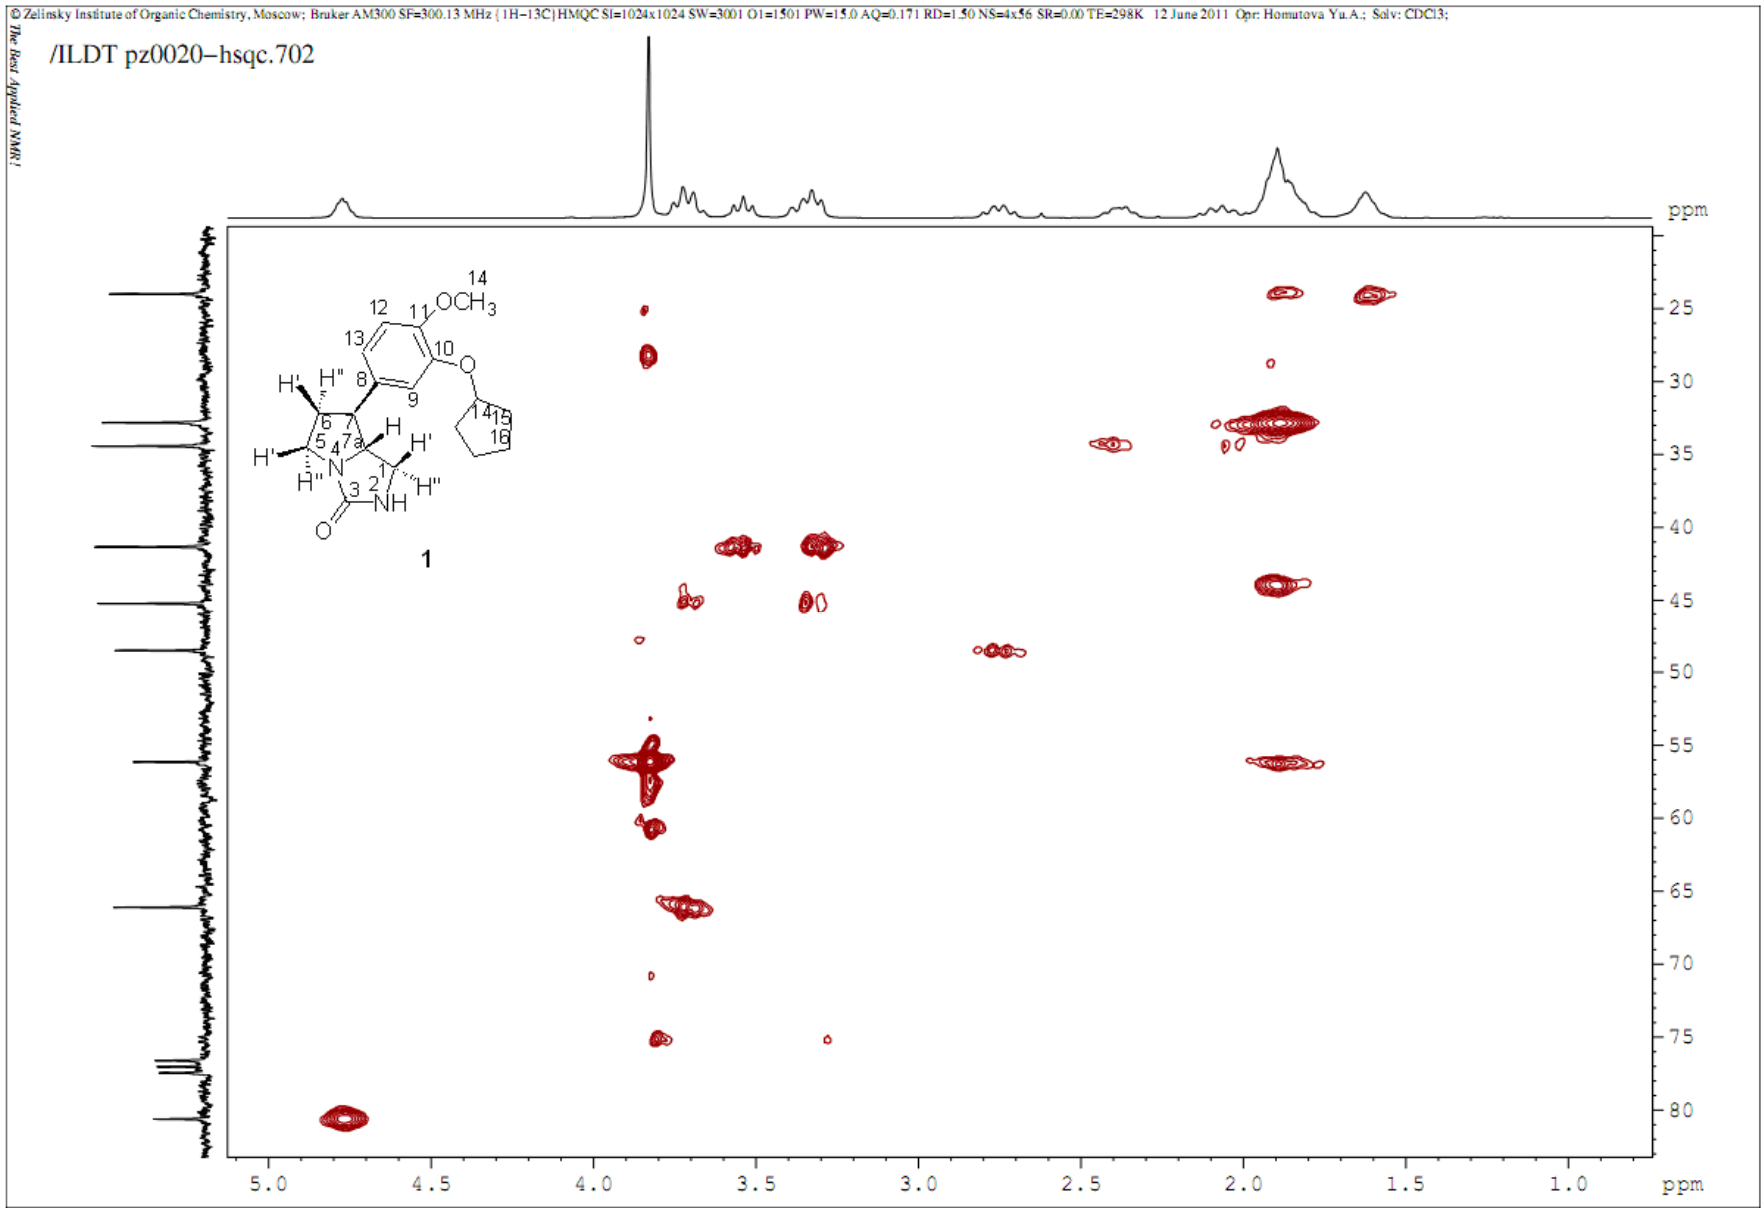

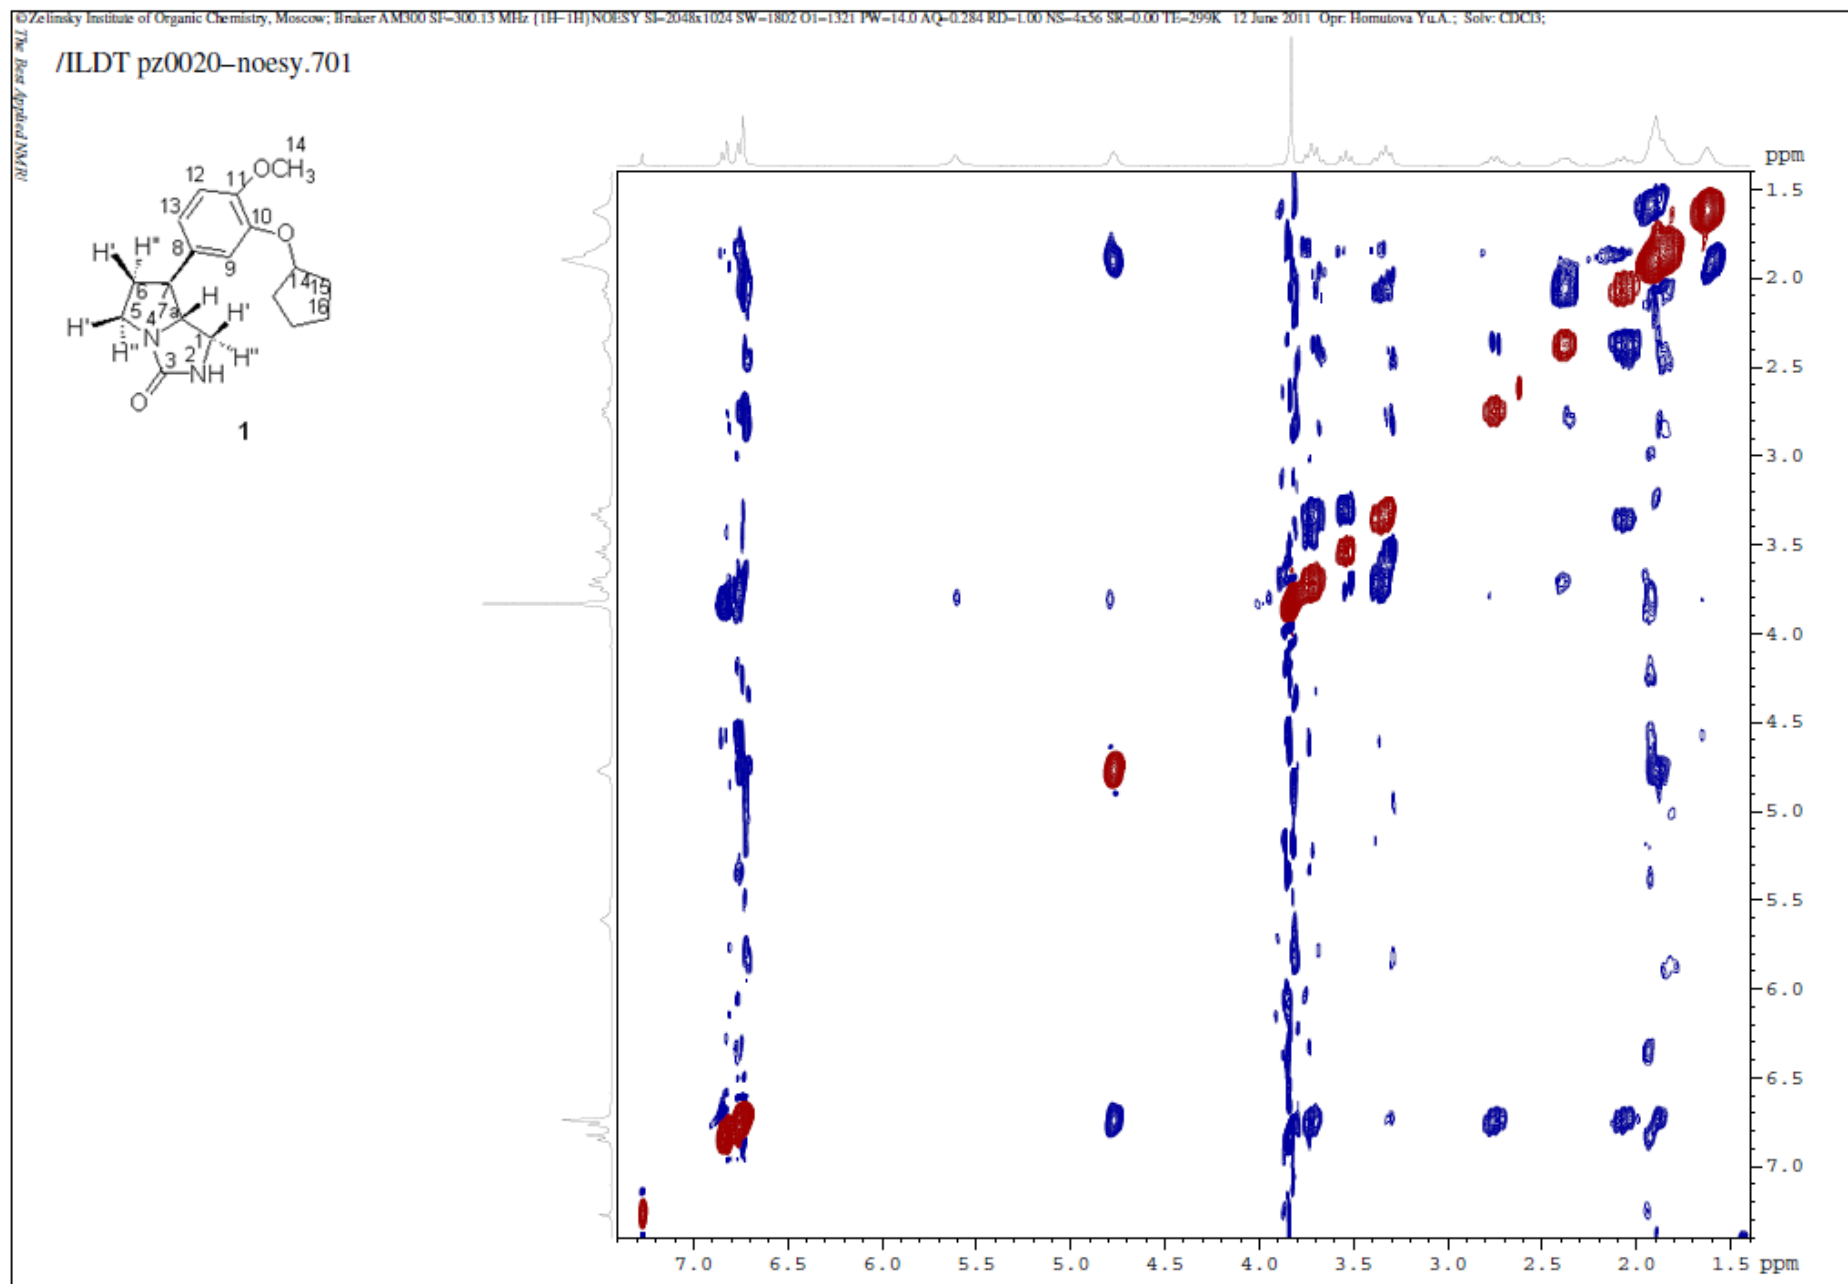

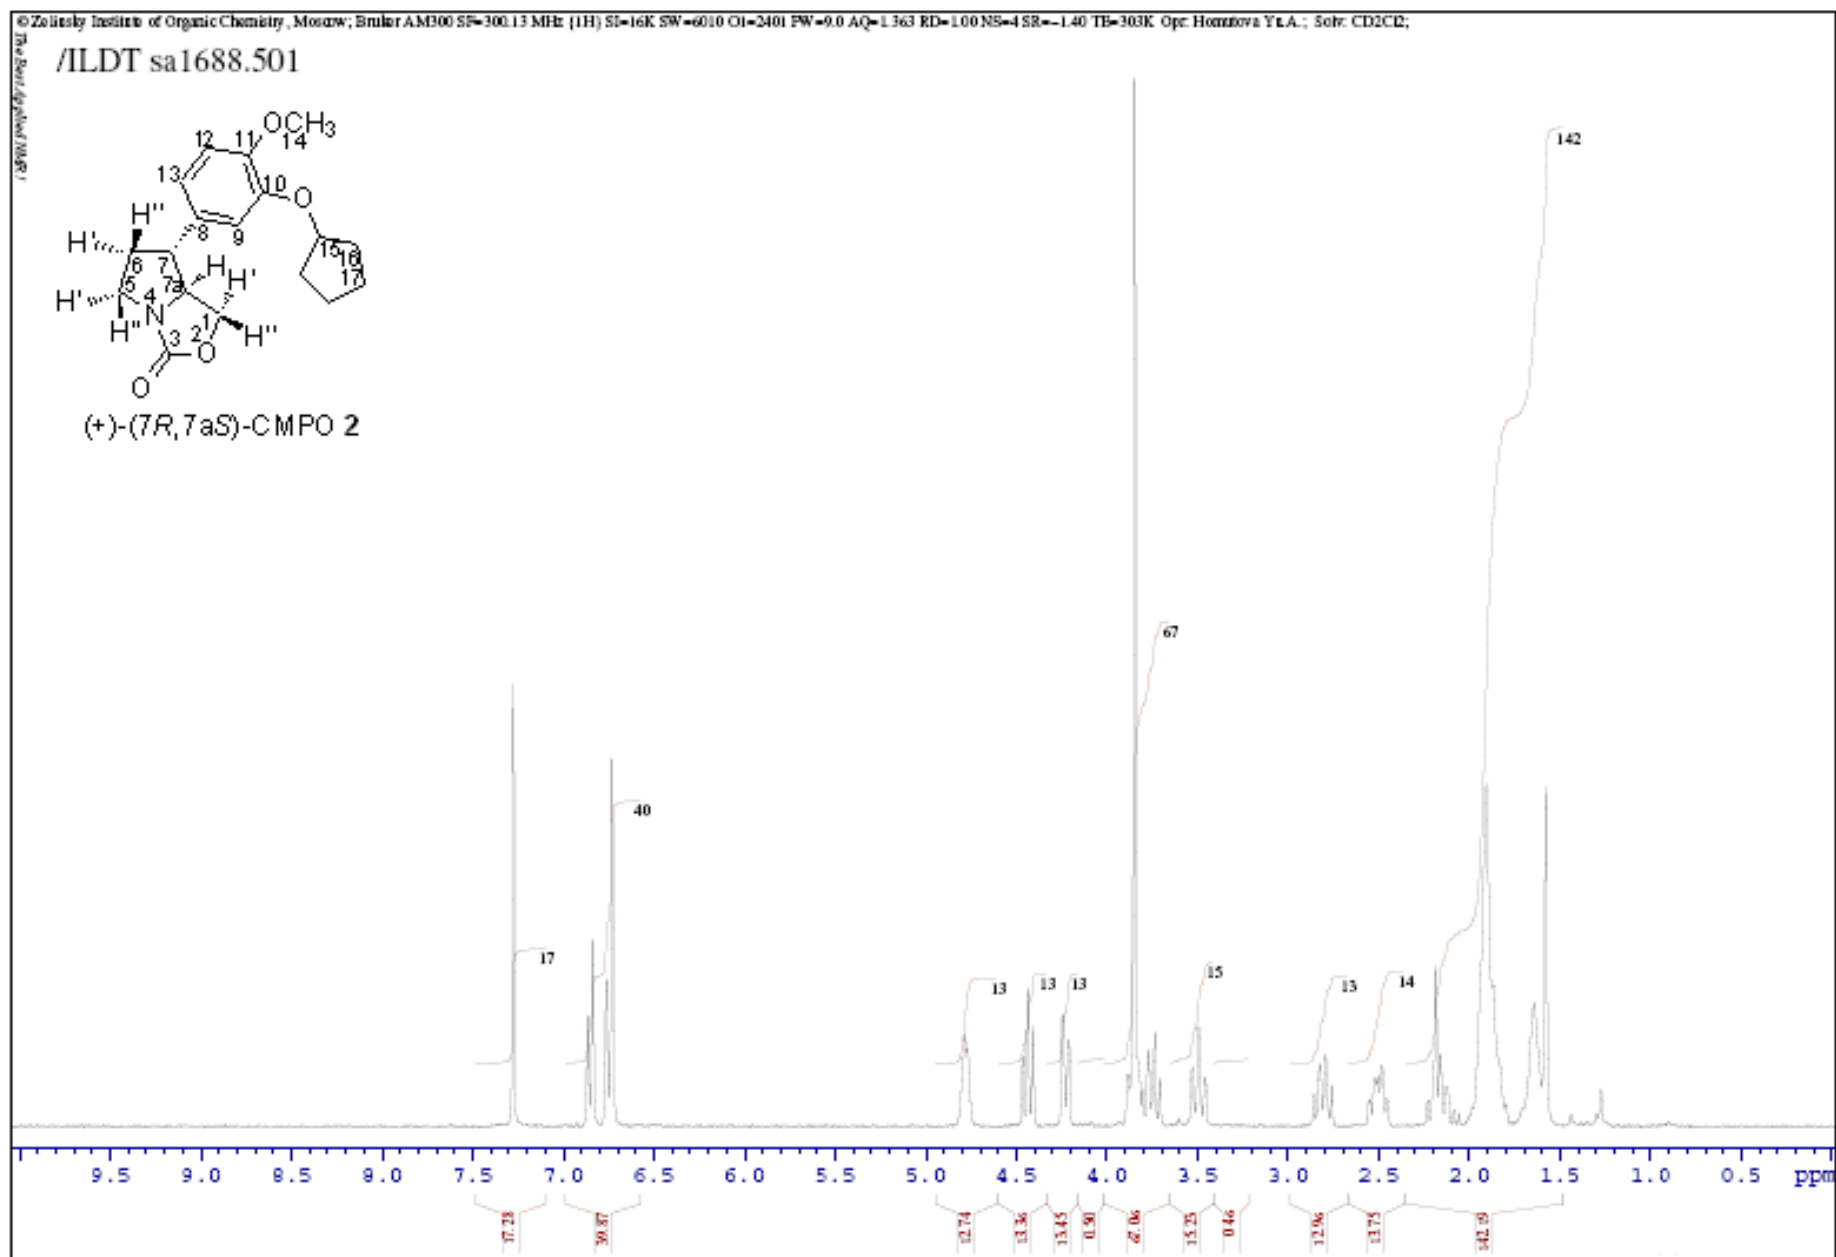

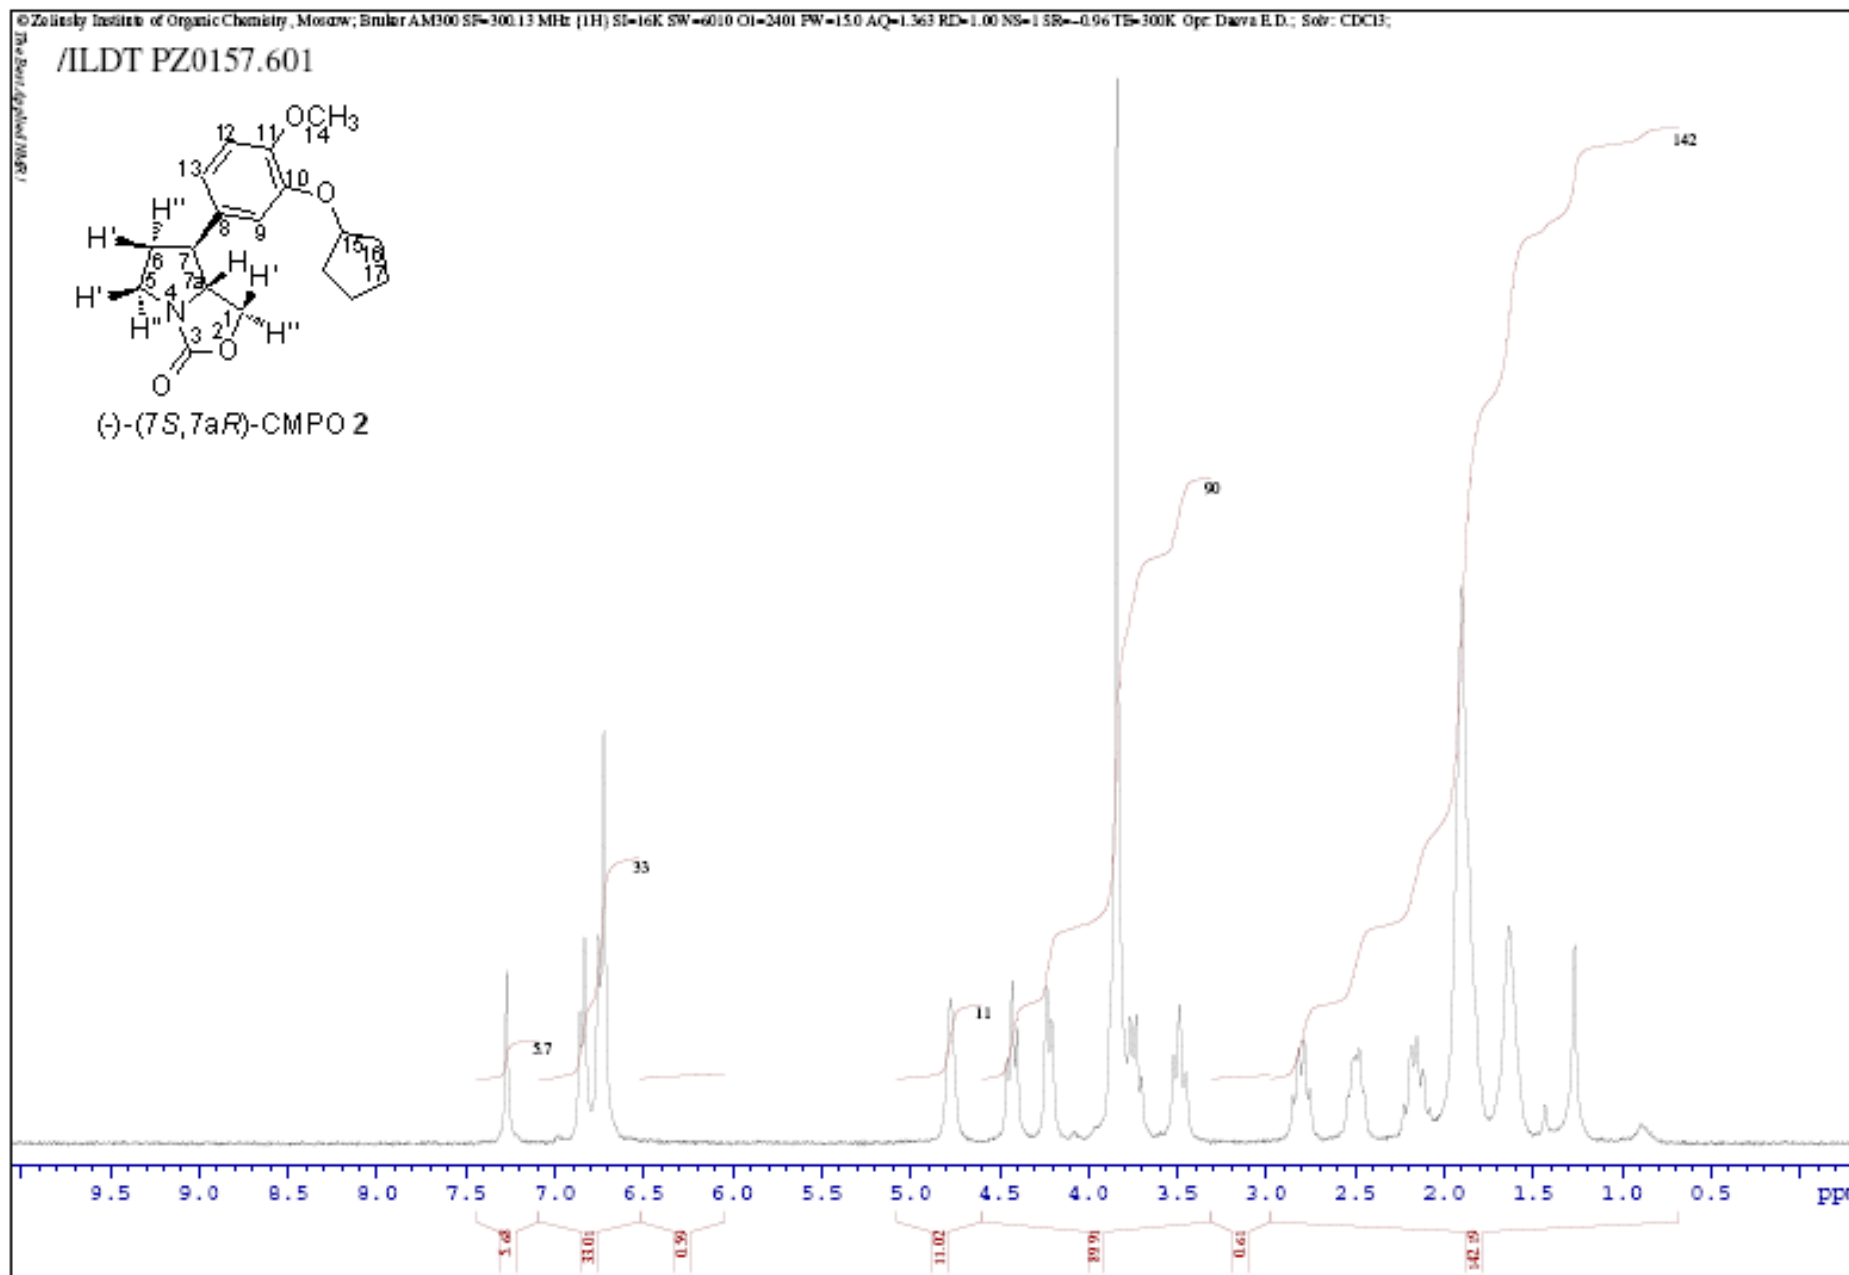

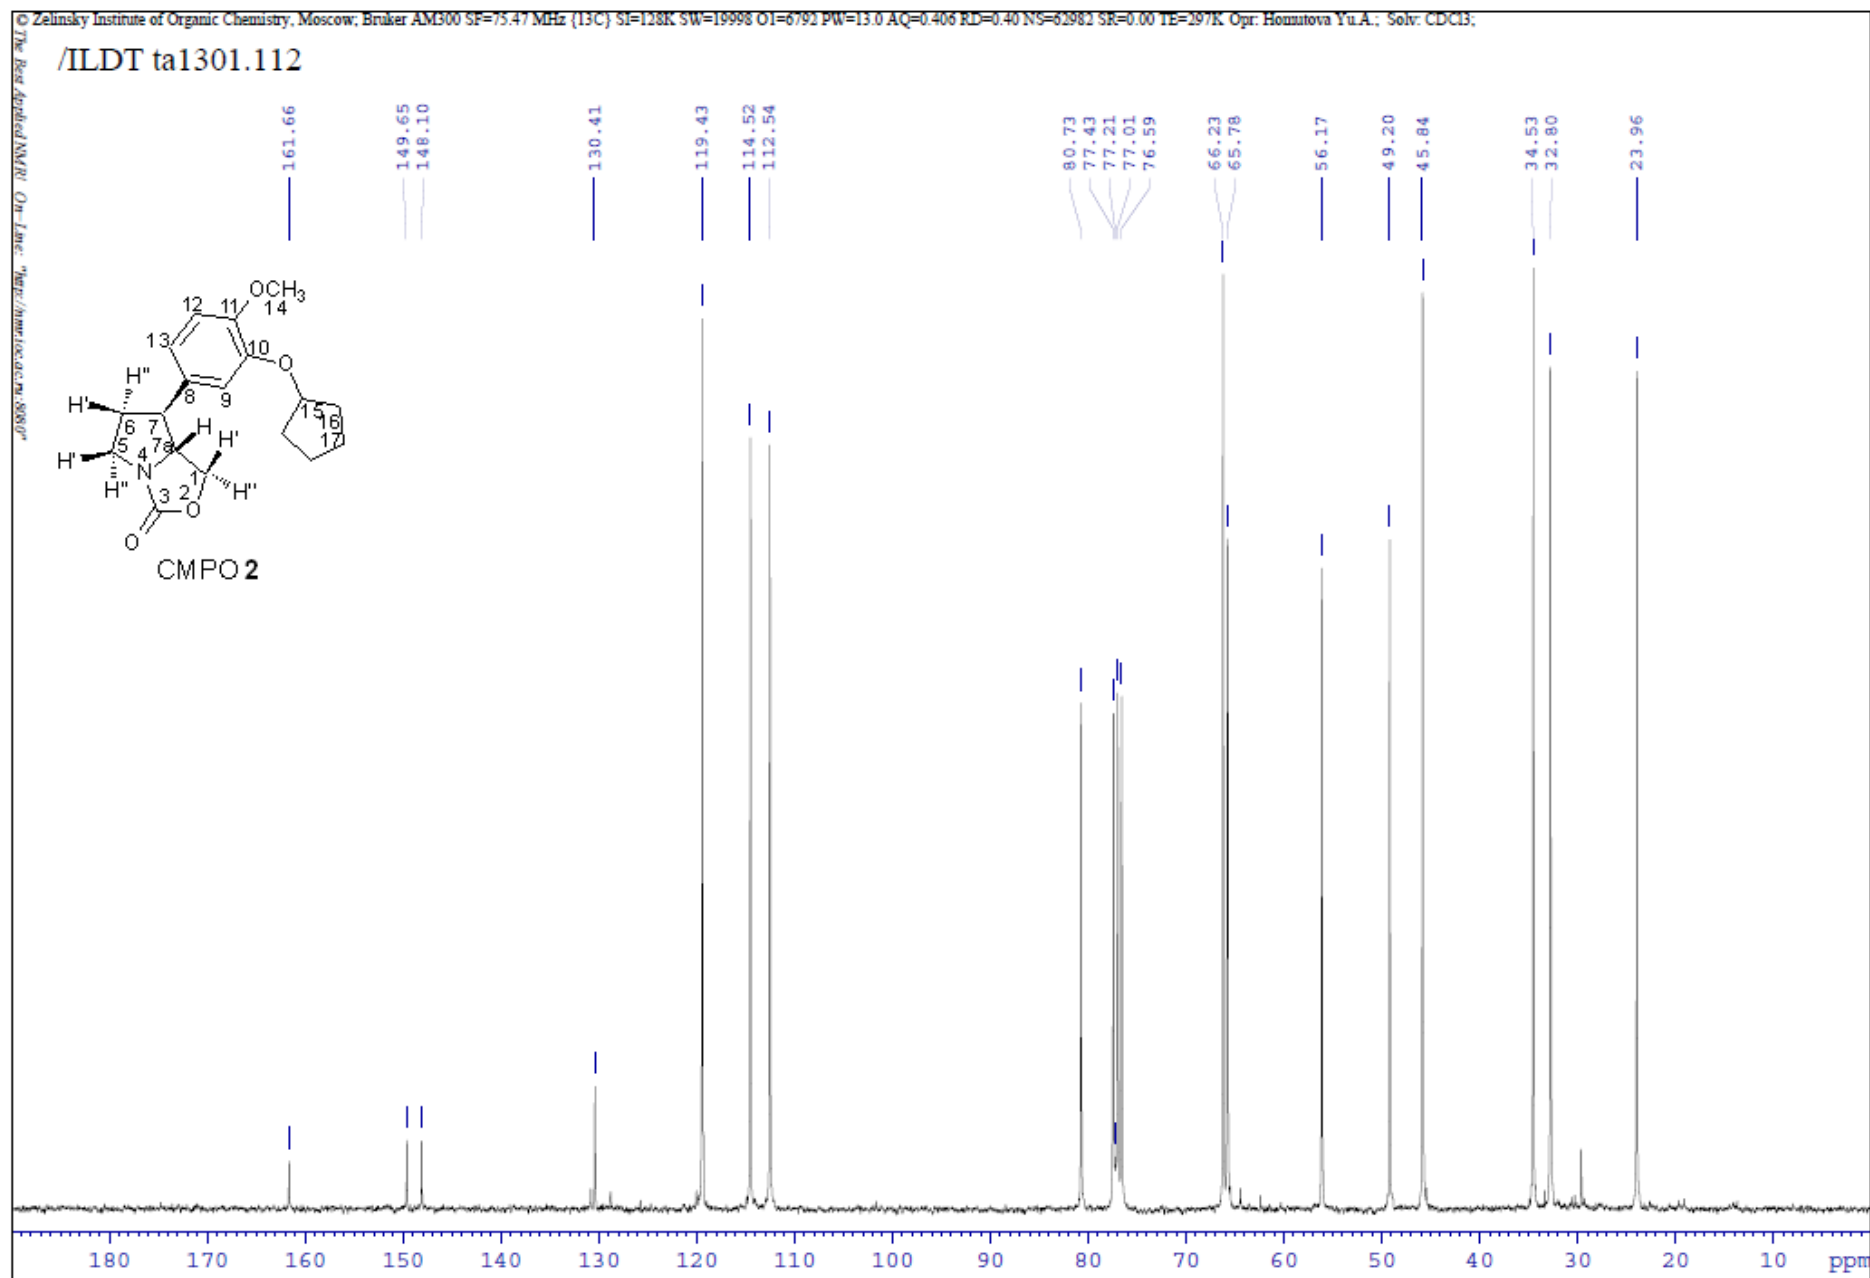

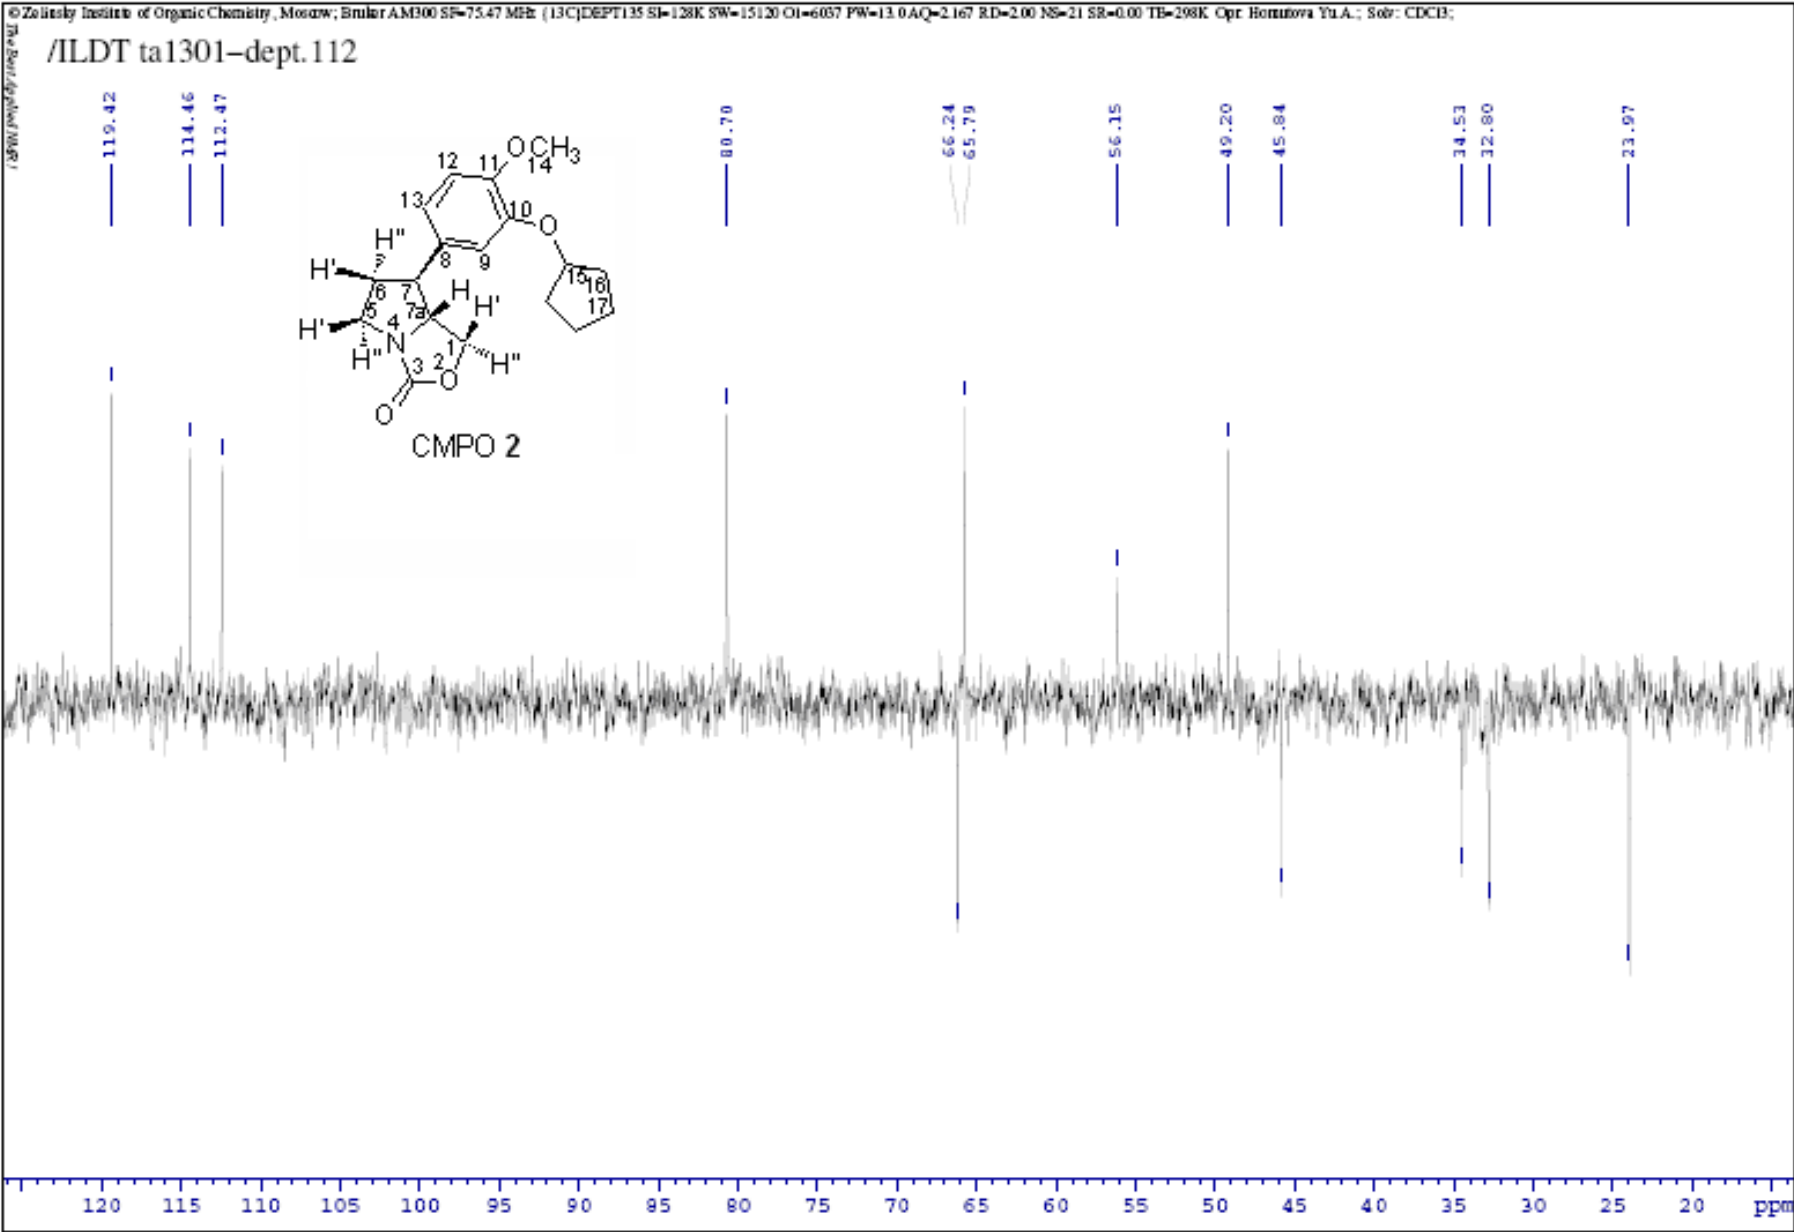

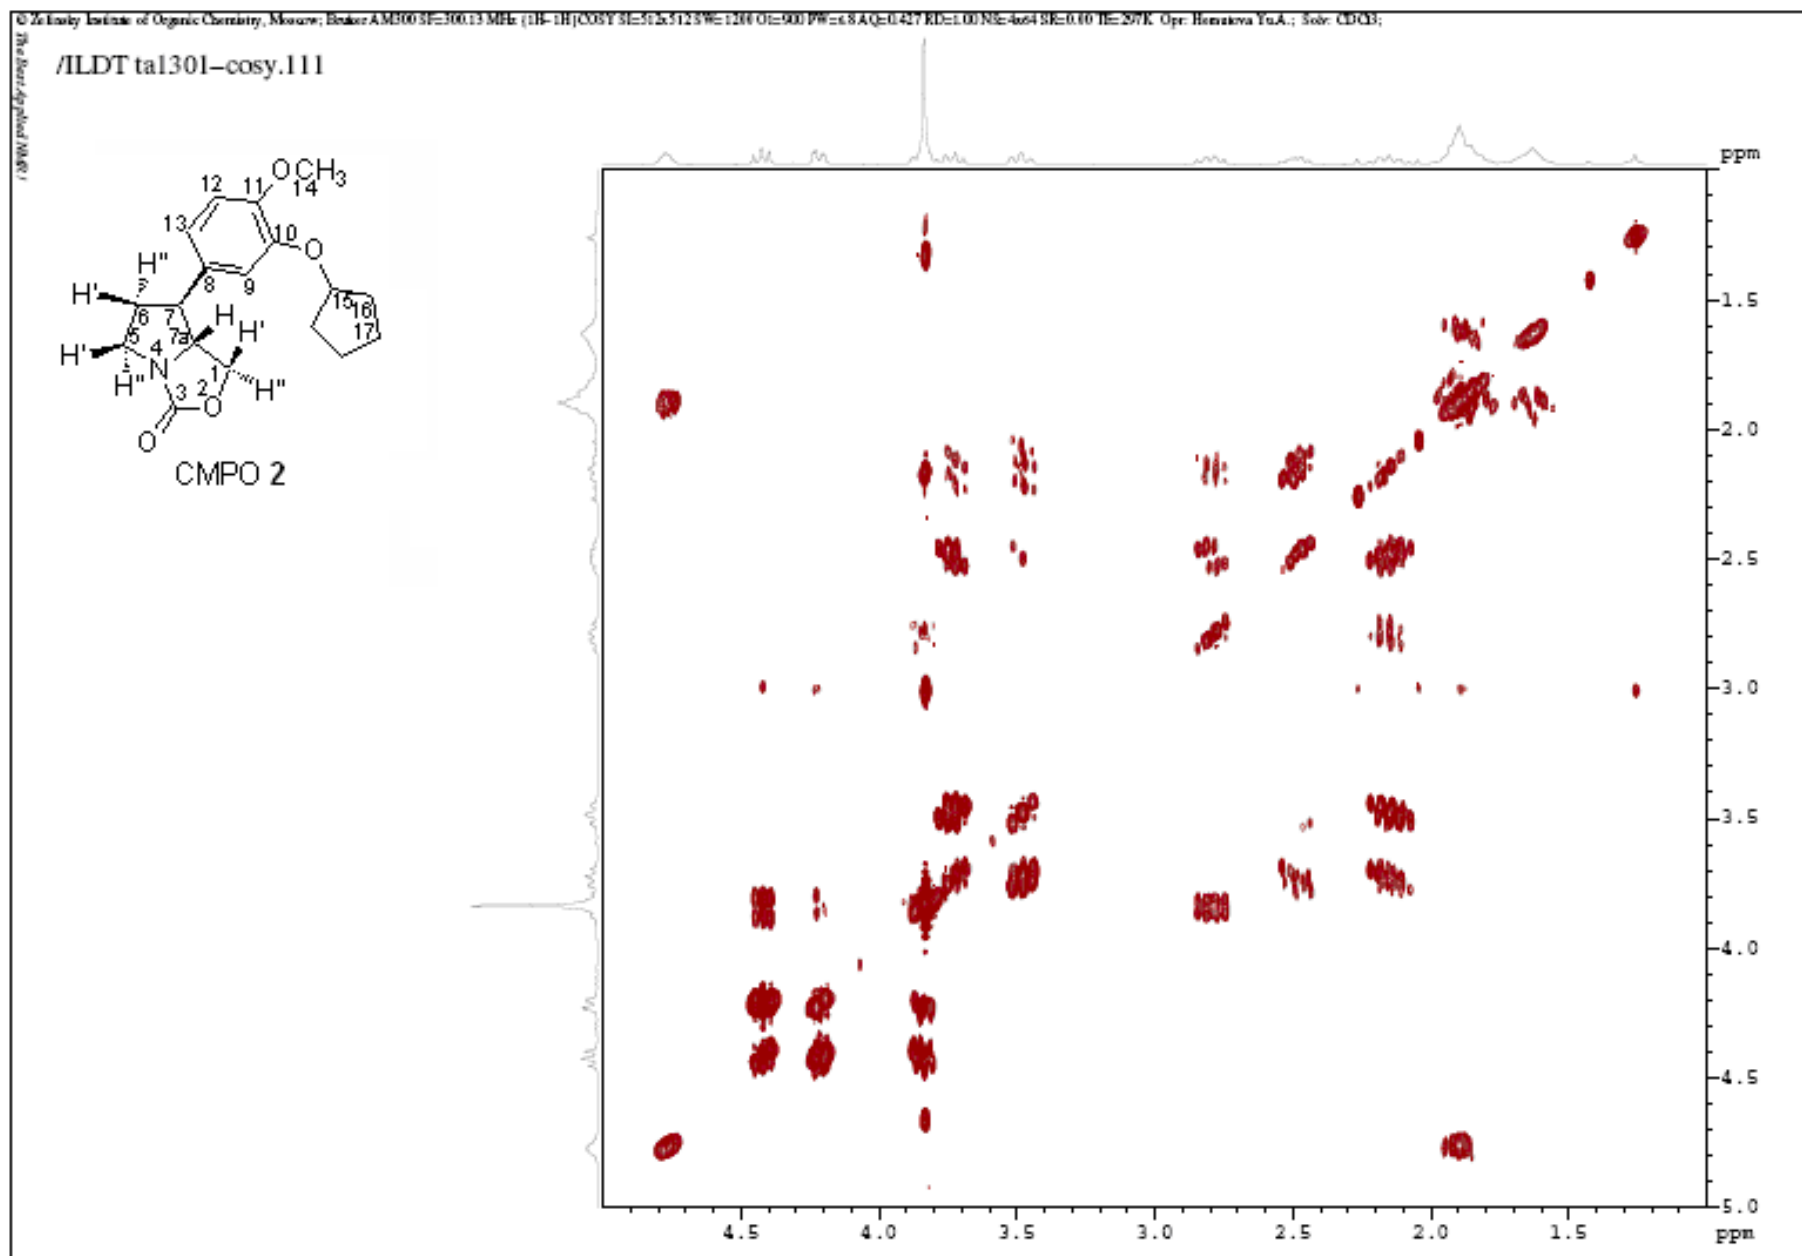

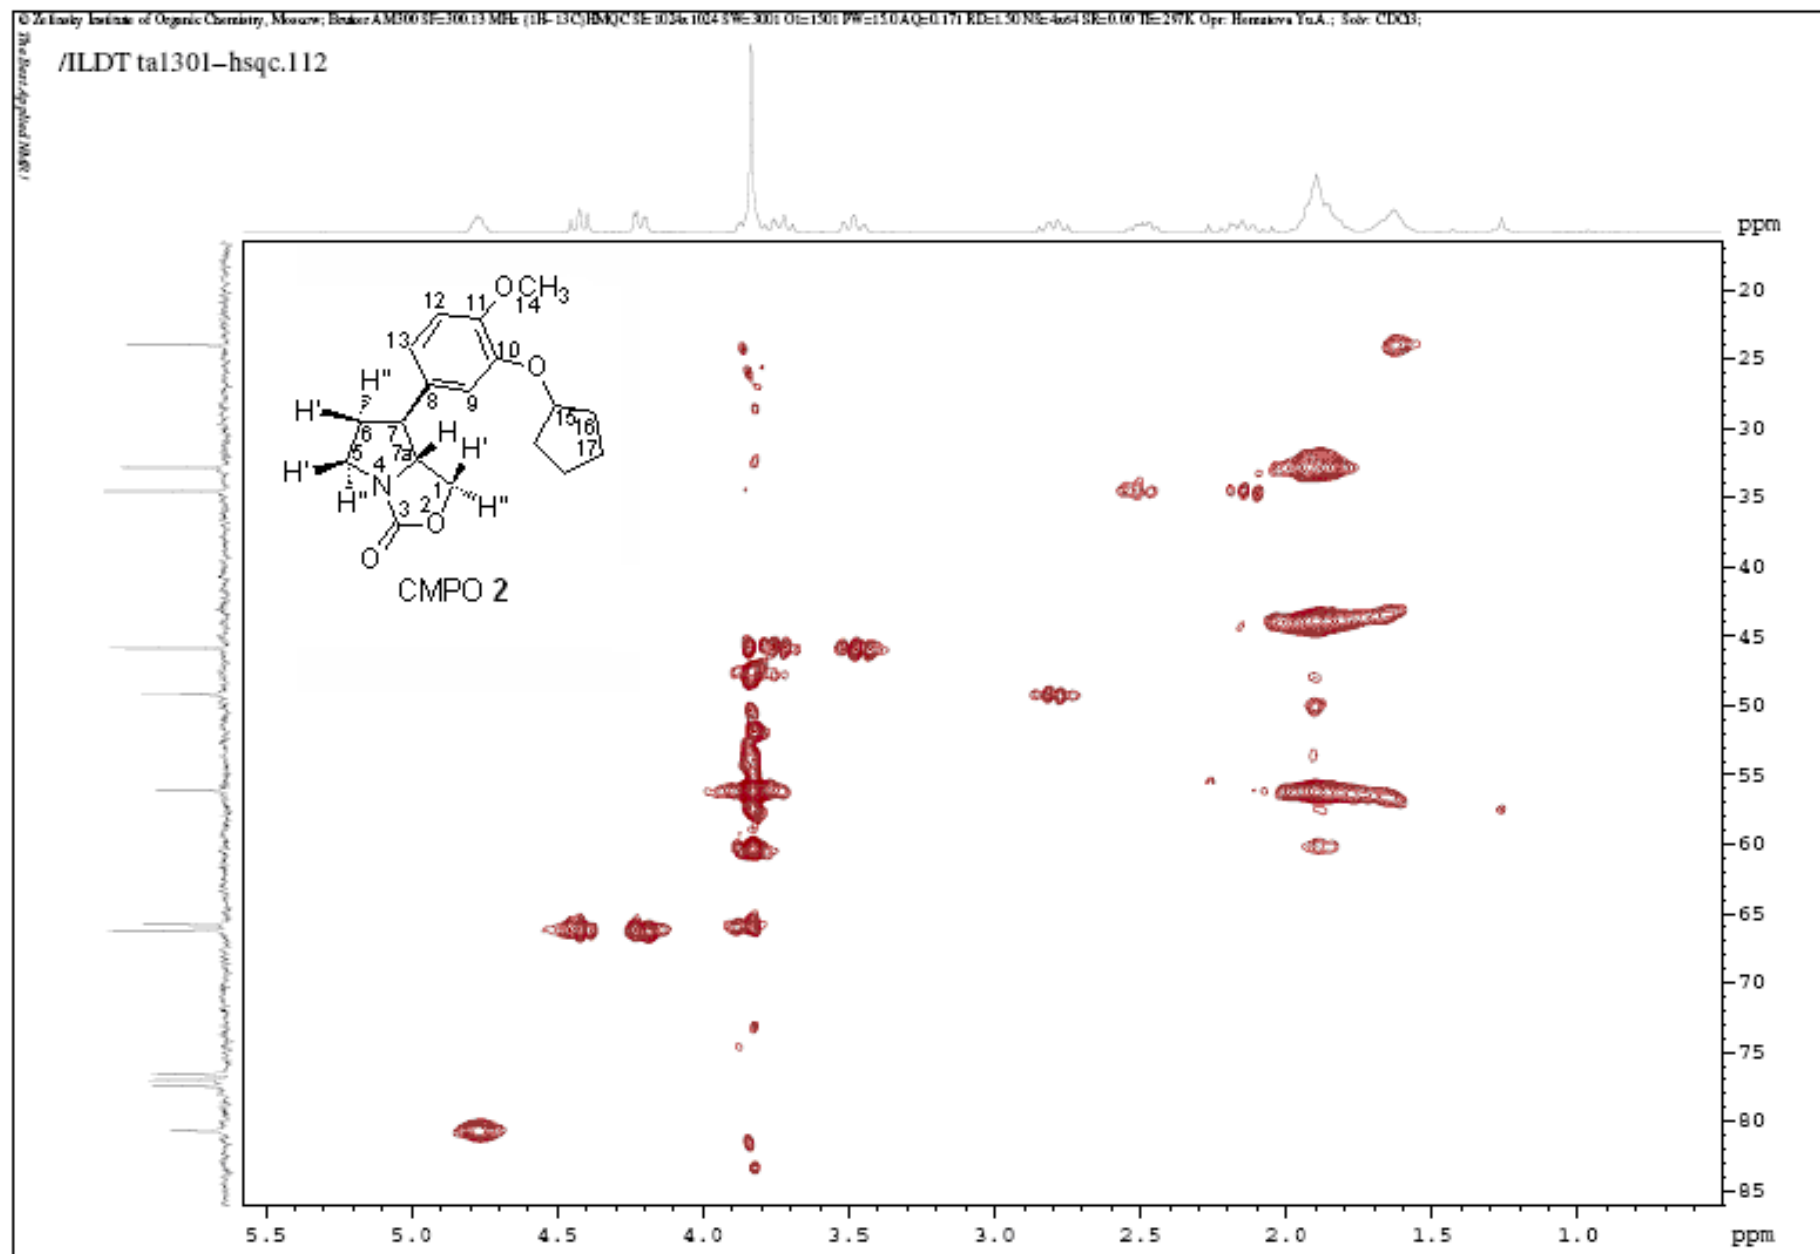



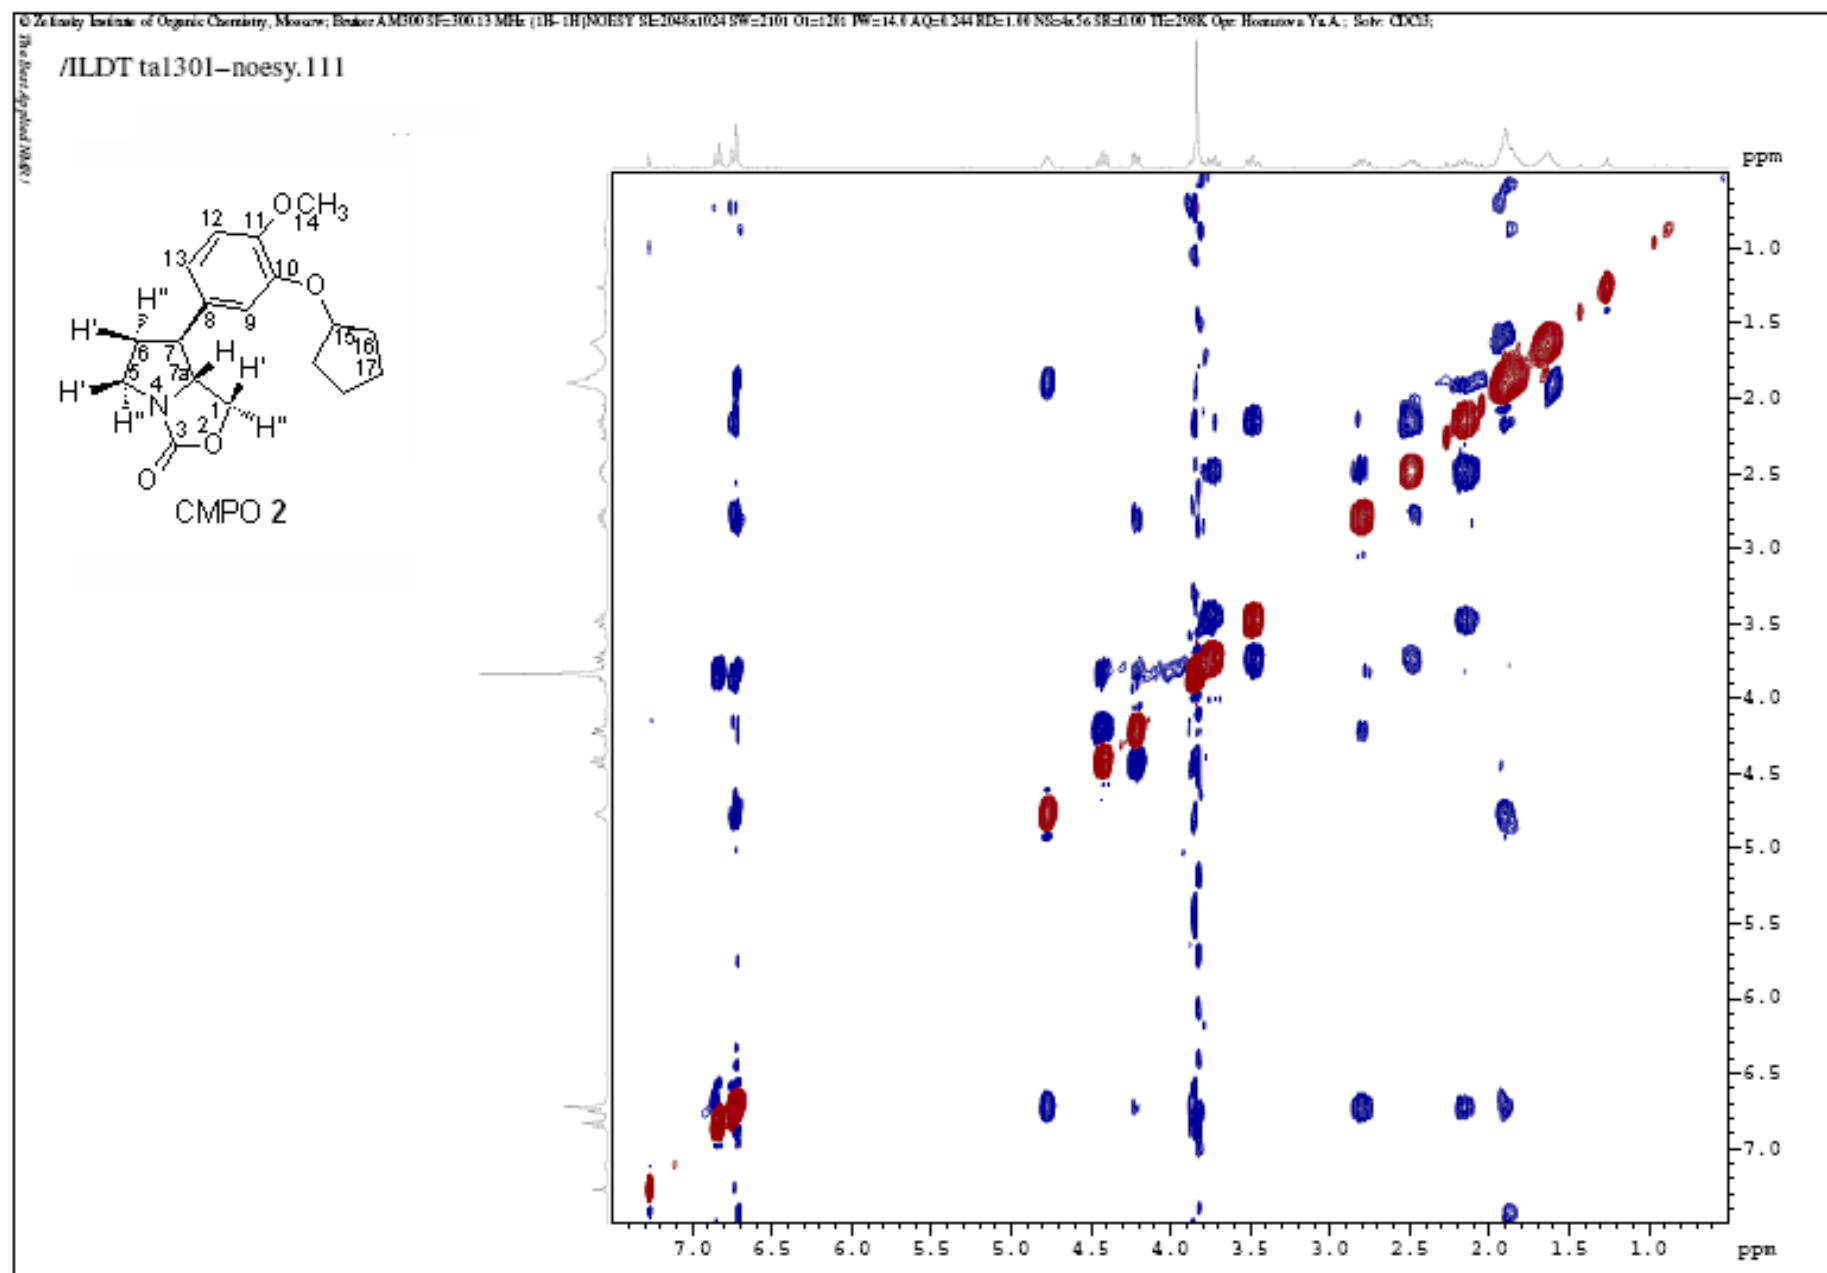

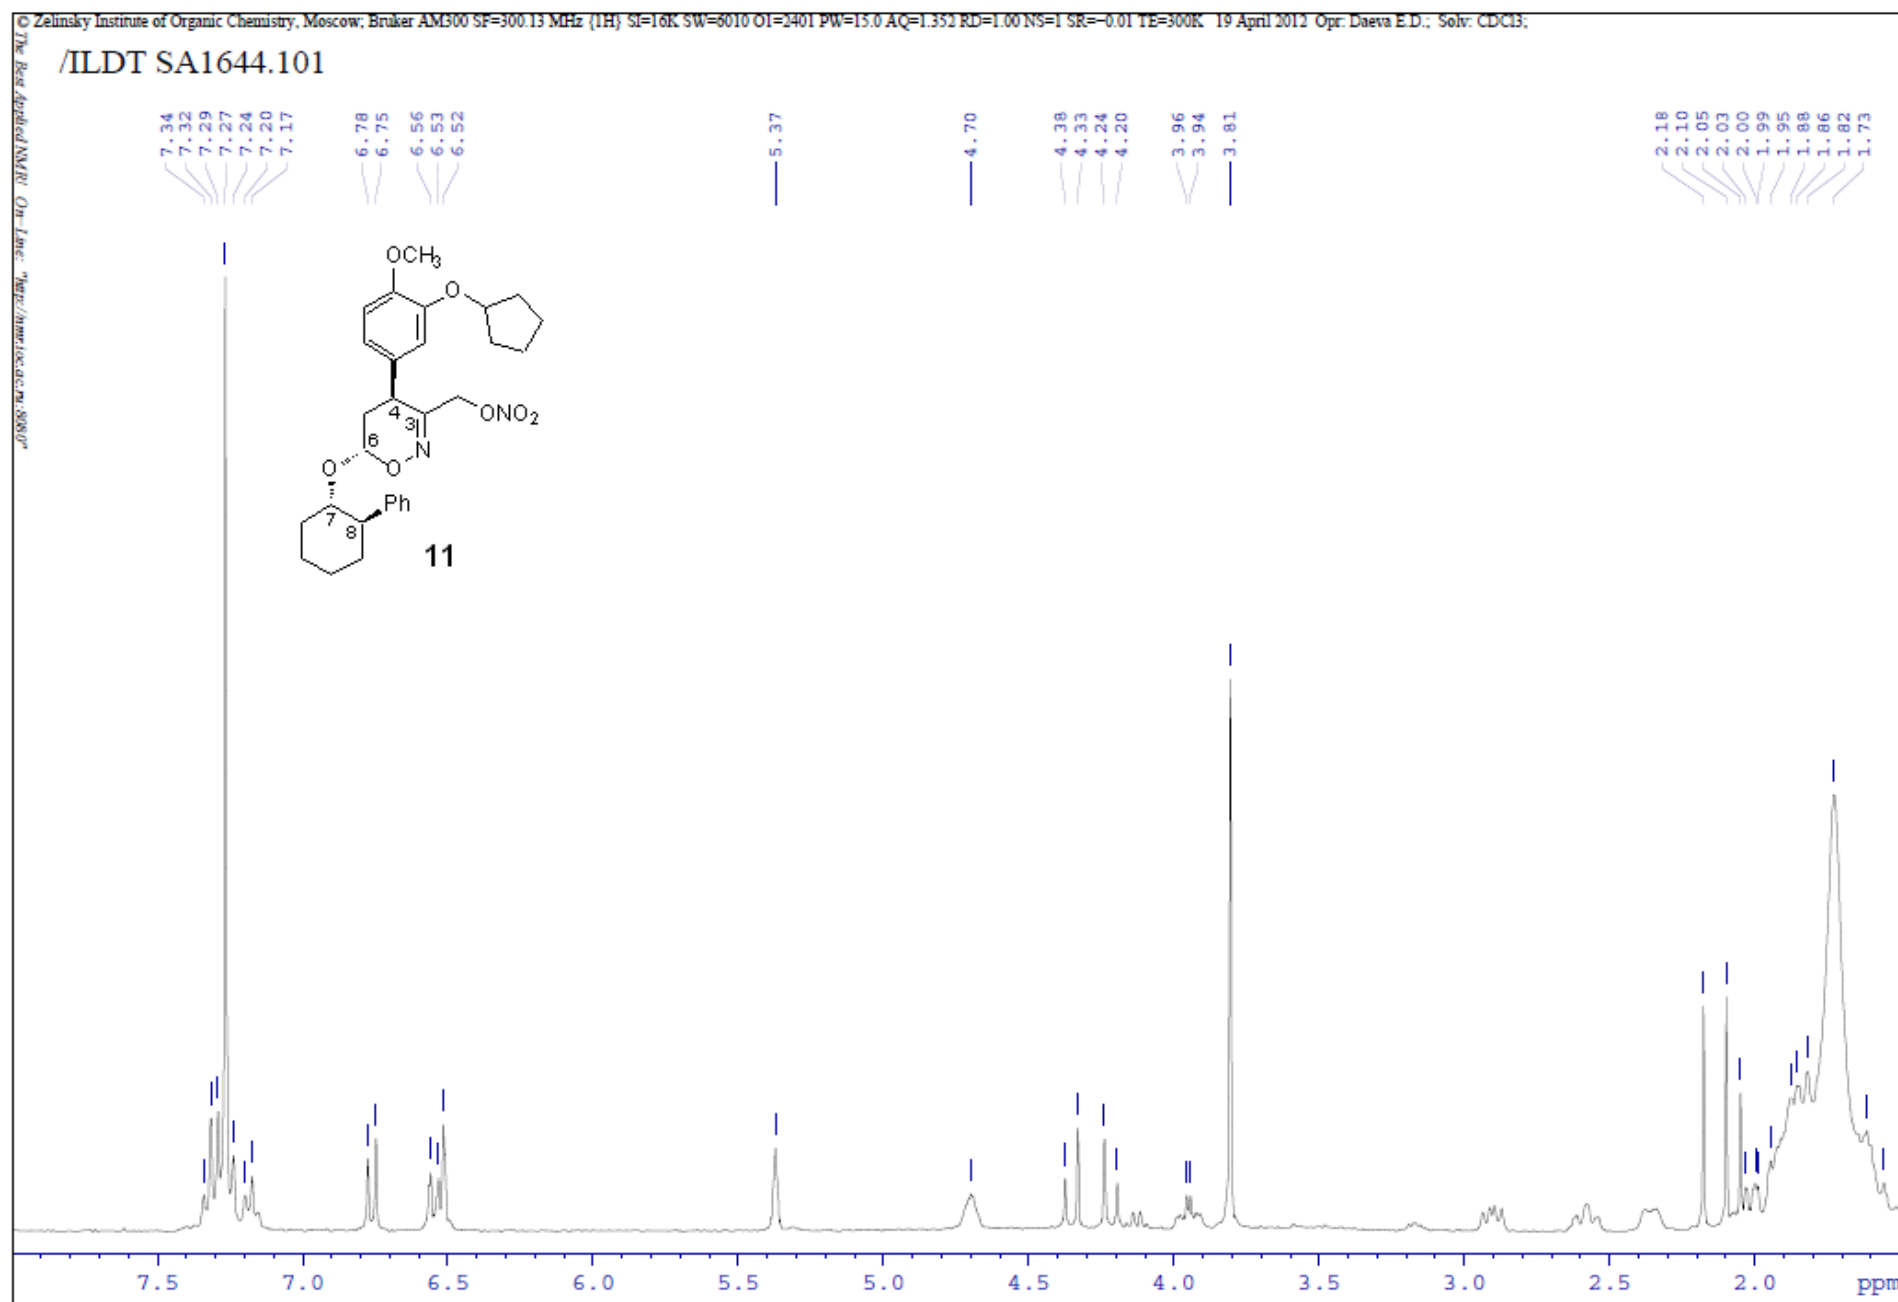



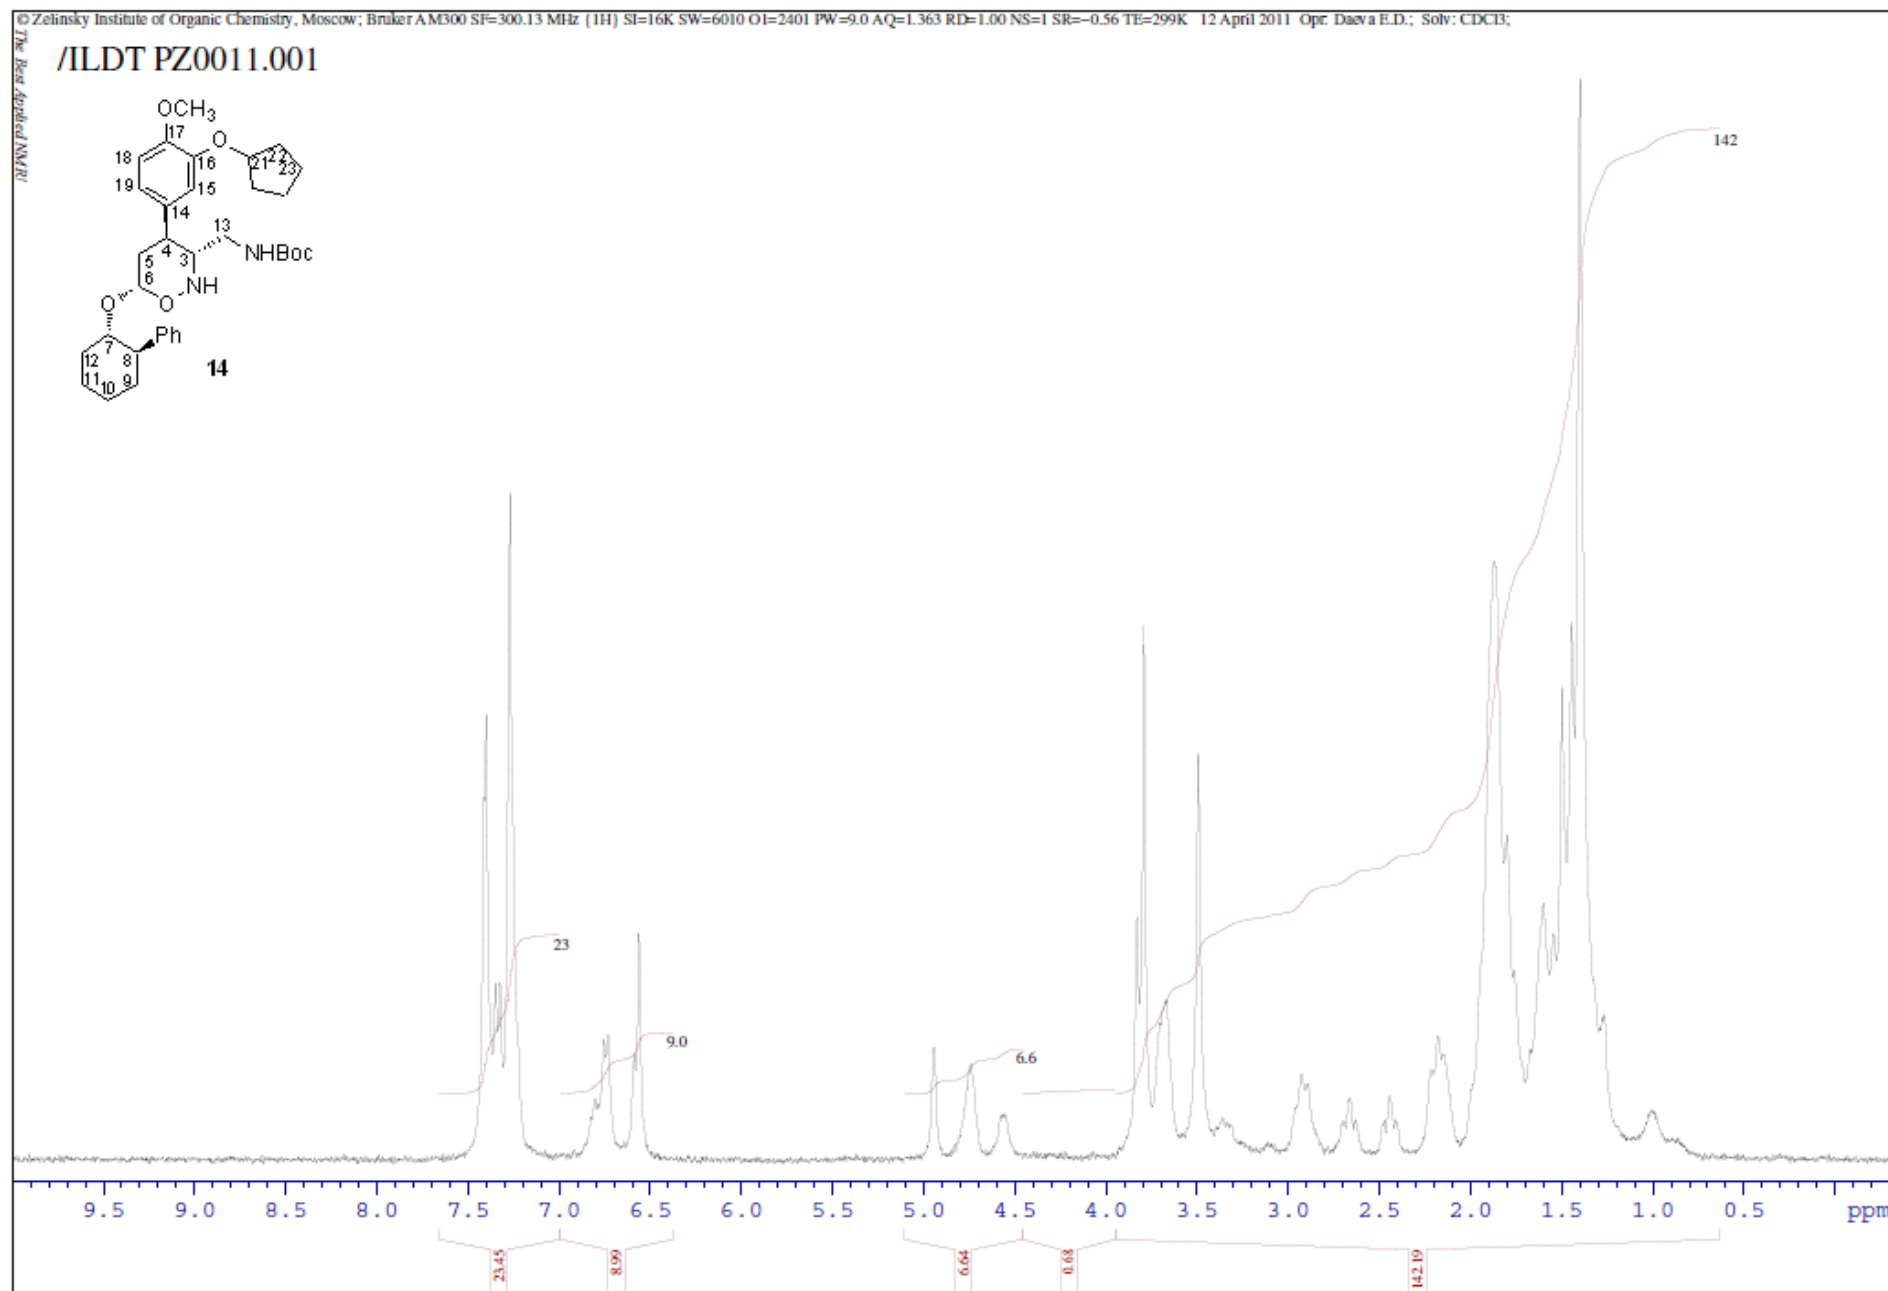

## Display Report

### Analysis Info

Analysis Name D:\Data\Kolotyrkina\2011\Zmurov\0414001.d  
Method tune\_wide.m  
Sample Name /ILPT PZ0011ms.001  
Comment C34H48N2O6 or C22H34N2O4 mw 580 or 390 calibrant added

Acquisition Date 4/14/2011 9:36:48 AM

Operator BDAL@DE  
Instrument / Ser# micrOTOF 10248

### Acquisition Parameter

|             |            |                      |          |                  |           |
|-------------|------------|----------------------|----------|------------------|-----------|
| Source Type | ESI        | Ion Polarity         | Positive | Set Nebulizer    | 0.4 Bar   |
| Focus       | Not active |                      |          | Set Dry Heater   | 180 °C    |
| Scan Begin  | 50 m/z     | Set Capillary        | 4500 V   | Set Dry Gas      | 4.0 l/min |
| Scan End    | 3000 m/z   | Set End Plate Offset | -500 V   | Set Divert Valve | Waste     |

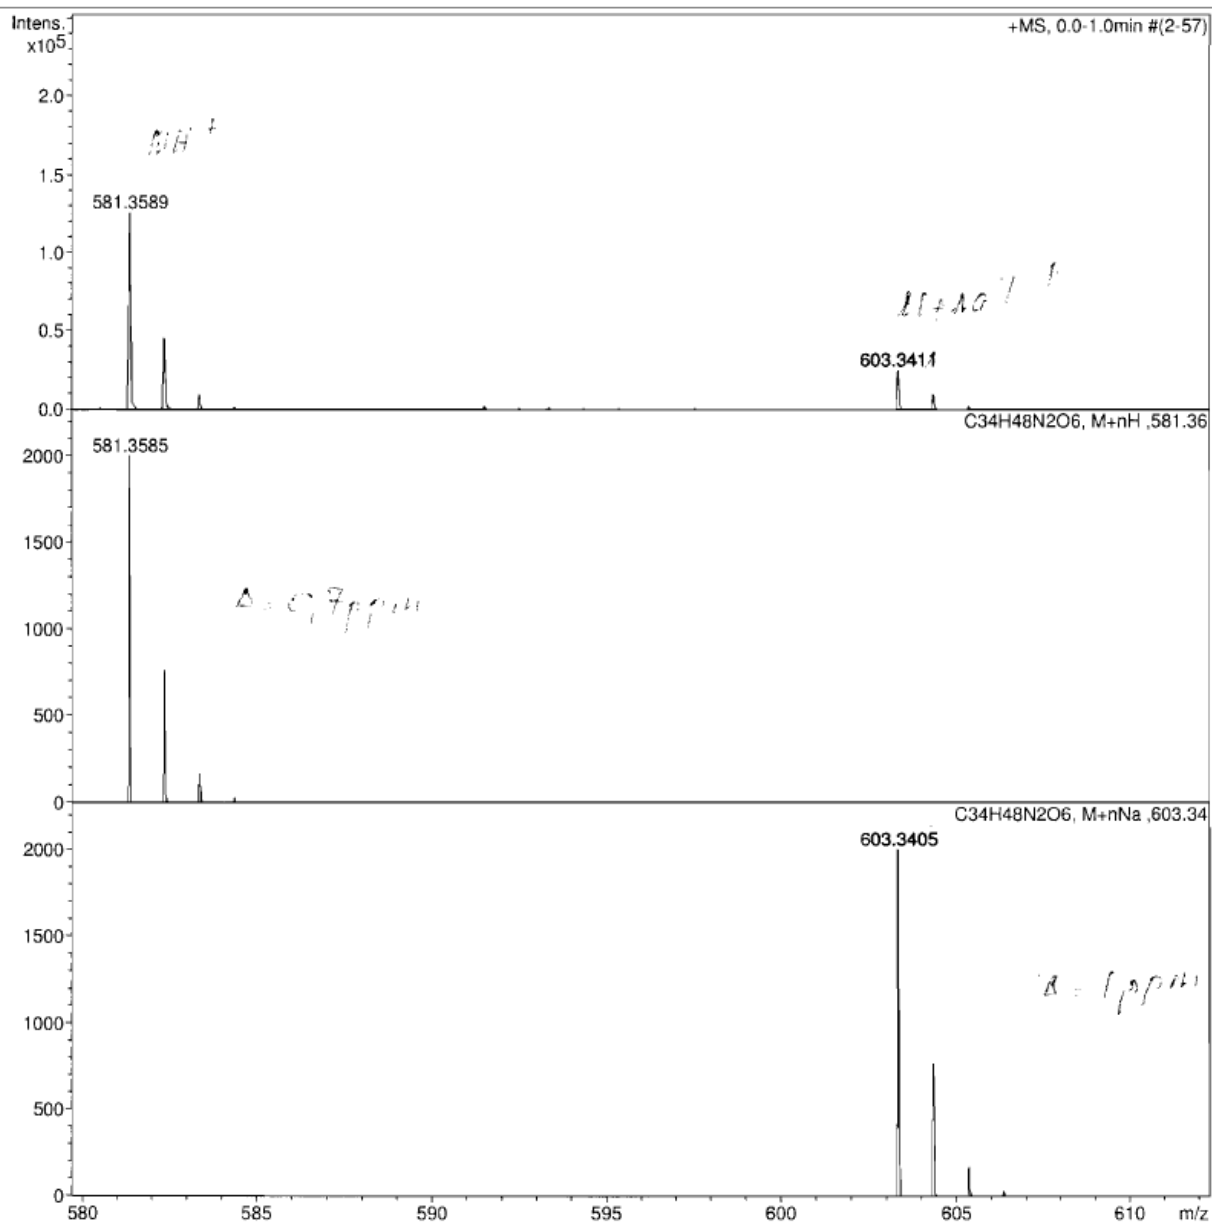

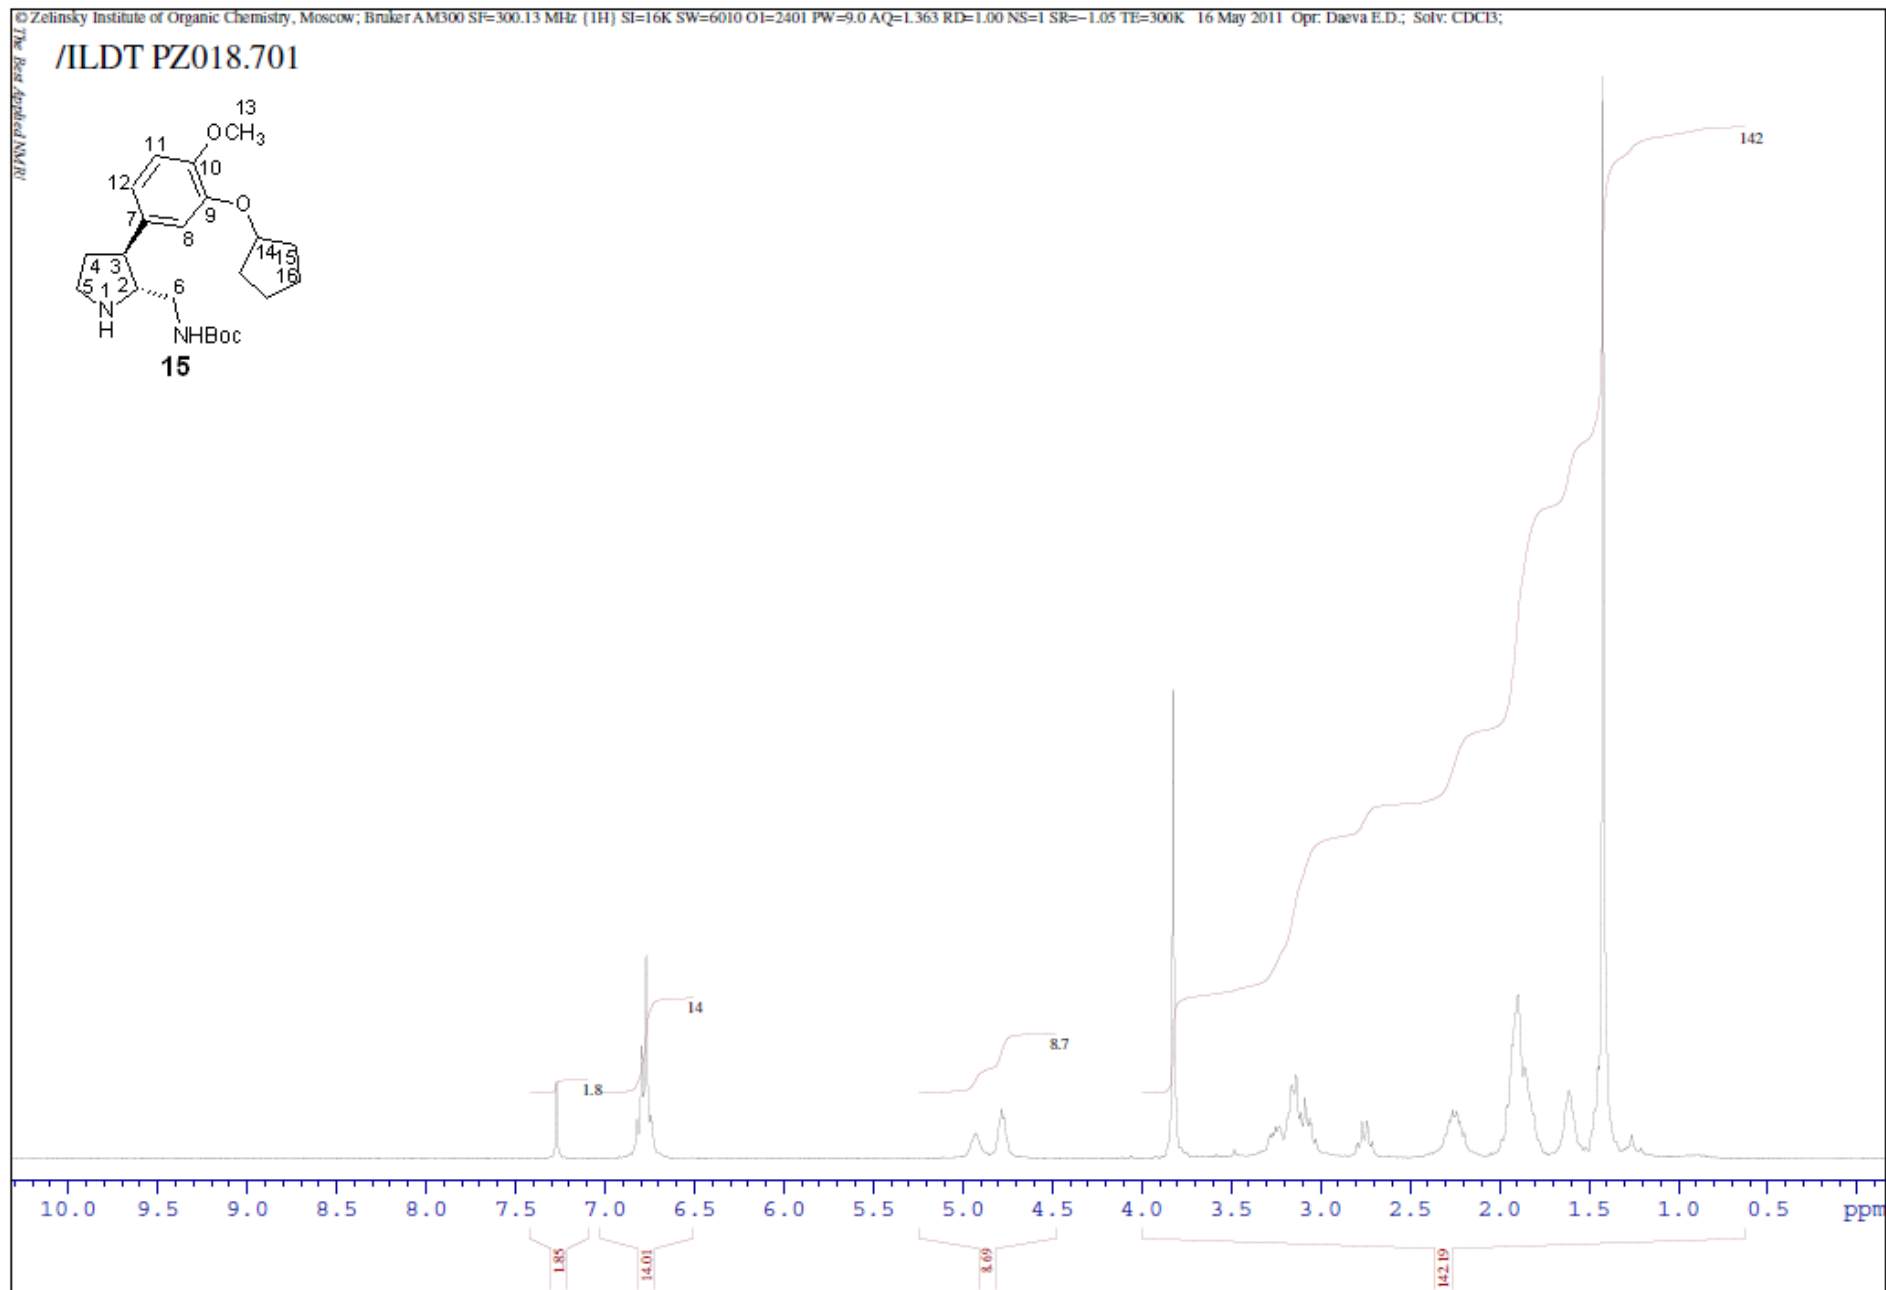

## Display Report

### Analysis Info

Analysis Name D:\Data\Kadentsev\Suhorukov\12-05-11-001.d  
Method tune\_wide.m  
Sample Name /ILDT PZ0018ms101  
Comment CH3OH dil 1000 no calibrant added

Acquisition Date 5/12/2011 1:57:22 PM

Operator BDAL@DE  
Instrument / Ser# microTOF 10248

### Acquisition Parameter

|             |            |                      |          |                  |           |
|-------------|------------|----------------------|----------|------------------|-----------|
| Source Type | ESI        | Ion Polarity         | Positive | Set Nebulizer    | 0.4 Bar   |
| Focus       | Not active |                      |          | Set Dry Heater   | 180 °C    |
| Scan Begin  | 50 m/z     | Set Capillary        | 4500 V   | Set Dry Gas      | 4.0 l/min |
| Scan End    | 3000 m/z   | Set End Plate Offset | -500 V   | Set Divert Valve | Waste     |

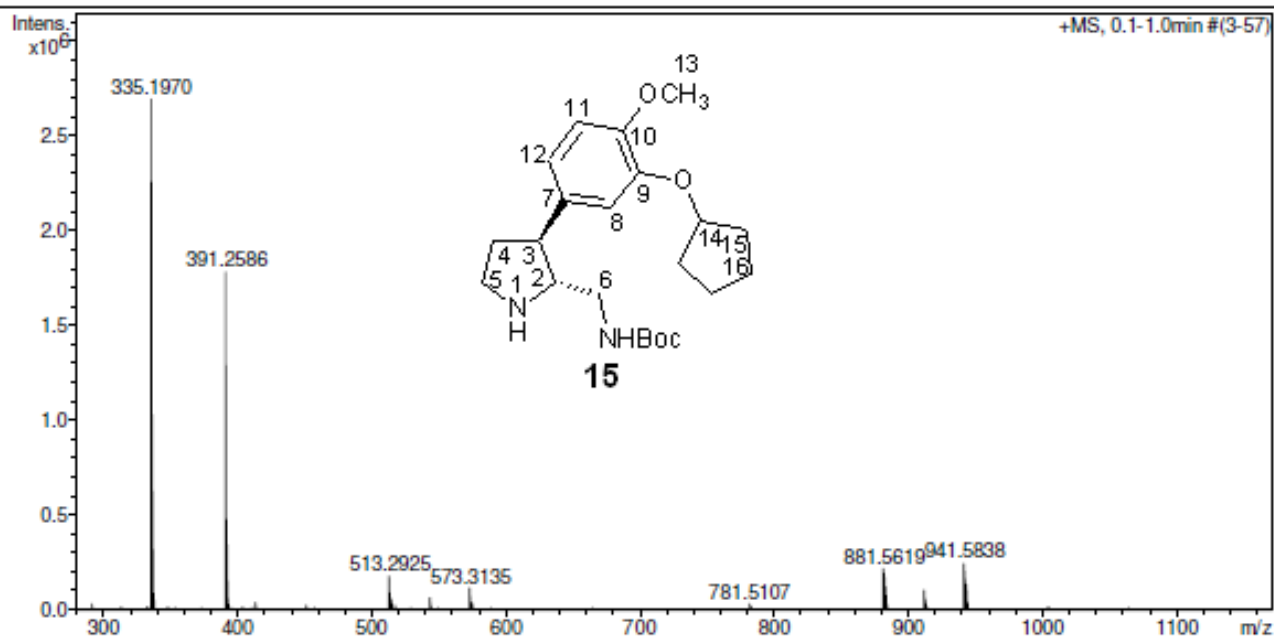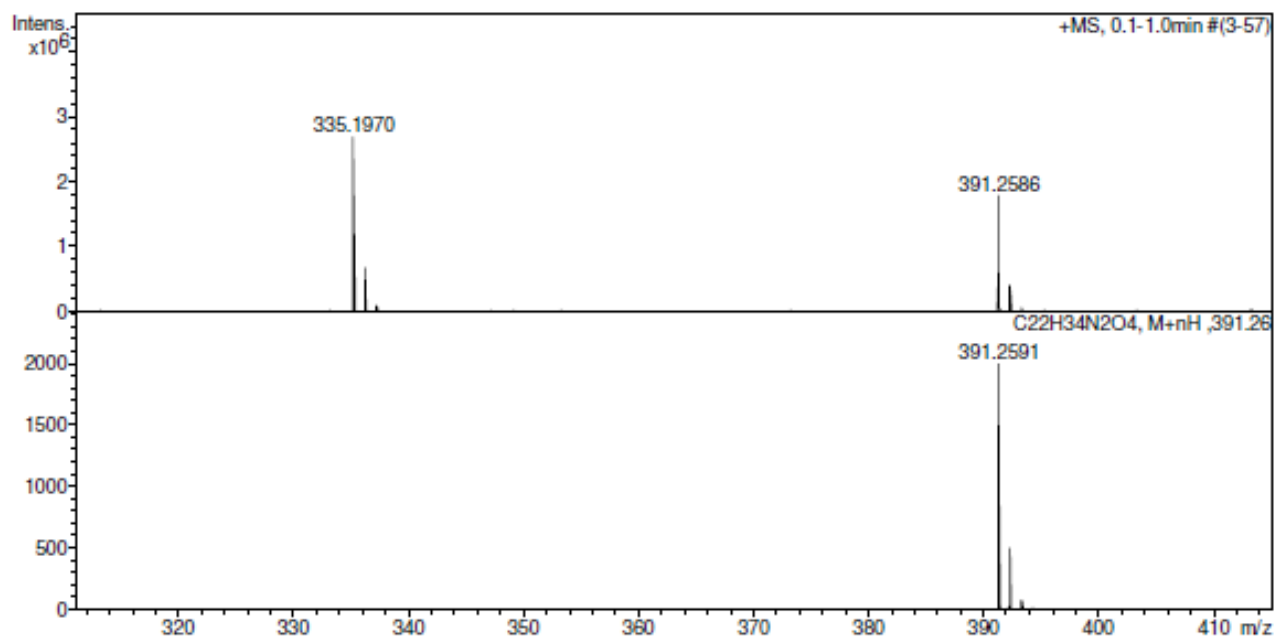

## Evaluation of PDEIVB1 Inhibition Activity of CMPI 1 and CMPO 2 Enantiomers

### Materials and methods.

PDE4B1 assay kit was used (BPS catalogue number 60342). A series of dilutions of the test compound (Table 1) were prepared with 10% DMSO in assay buffer and 5µl of the dilution was added to a 50µl reaction so that the final concentration of DMSO is 1% in all of reactions.

**Table 1.**

| Compound I.D.                             | Stock Concentration | Dissolving Solvent | Test Range (µM) | Intermediate Dilution               |
|-------------------------------------------|---------------------|--------------------|-----------------|-------------------------------------|
| (-)-(7 <i>S</i> ,7 <i>aR</i> )-<br>CMPI 1 | 10mM                | DMSO               | 0.001 - 10      | 10 % DMSO in<br>PDE Assay<br>Buffer |
| (+)-(7 <i>R</i> ,7 <i>aS</i> )-<br>CMPI 1 | 10mM                | DMSO               | 0.001 - 10      | 10 % DMSO in<br>PDE Assay<br>Buffer |
| (-)-(7 <i>S</i> ,7 <i>aR</i> )-<br>CMPO 2 | 10mM                | DMSO               | 0.001 - 10      | 10 % DMSO in<br>PDE Assay<br>Buffer |
| (+)-(7 <i>R</i> ,7 <i>aS</i> )-<br>CMPO 2 | 10mM                | DMSO               | 0.001 - 10      | 10 % DMSO in<br>PDE Assay<br>Buffer |
| <i>rac</i> -CMPO 2                        | 10mM                | DMSO               | 0.001 - 10      | 10 % DMSO in<br>PDE Assay<br>Buffer |

The enzymatic reactions were conducted at room temperature for 60 minutes in a 50µl mixture containing PDE assay buffer, 100nM FAM-cAMP, a PDE enzyme (Table 2) and the test compound (Table 1).

**Table 2.**

| Assay  | BPS Catalog Number | Enzyme Used (ng) / Reaction | Substrate       |
|--------|--------------------|-----------------------------|-----------------|
| PDE4B1 | 60041              | 0.05                        | 100 nM FAM-cAMP |

After the enzymatic reaction, 100 µl of a binding solution (1:100 dilution of the binding agent with the binding agent diluent) was added to each reaction and the reaction was performed at room temperature for 30 minutes. Fluorescence intensity was measured at an excitation of 485 nm and an emission of 528 nm using a Tecan Infinite M1000 microplate reader.

### Data analysis

PDE activity assays were performed in duplicate at each concentration. Fluorescence intensity is converted to fluorescence polarization using the Tecan Magellan6 software. The fluorescence



polarization data were analyzed using the computer software, Graphpad Prism. The fluorescence polarization ( $FP_t$ ) in absence of the compound in each data set was defined as 100% activity. In the absence of PDE and the compound, the value of fluorescent polarization ( $FP_b$ ) in each data set was defined as 0% activity. The percent activity in the presence of the compound was calculated according to the following equation: % activity =  $(FP - FP_b)/(FP_t - FP_b) \times 100\%$ , where  $FP$  = the fluorescence polarization in the presence of the compound.

The values of % activity versus a series of compound concentrations were then plotted using non-linear regression analysis of Sigmoidal dose-response curve generated with the equation  $Y = B + (T - B) / (1 + 10^{((\text{LogEC}_{50} - X) \times \text{Hill Slope})})$ , where  $Y$  = percent activity,  $B$  = minimum percent activity,  $T$  = maximum percent activity,  $X$  = logarithm of compound and Hill Slope = slope factor or Hill coefficient. The  $IC_{50}$  value was determined by the concentration causing a half-maximal percent activity.

Data for the effect of each compound on PDE4B1 activity is presented below.

**Table 3.** Data for the Effect of (–)-(7*S*,7*aR*)-CMPI **1** on PDE4B1 Activity

| (–)-(7 <i>S</i> ,7 <i>aR</i> )-<br>CMPI <b>1</b><br>(Log [ $\mu$ M]) | PDE Activity<br>[(Fluorescent Polarization (mp))] |         | % Activity |         |
|----------------------------------------------------------------------|---------------------------------------------------|---------|------------|---------|
|                                                                      | Repeat1                                           | Repeat2 | Repeat1    | Repeat2 |
| No Compound                                                          | 132                                               | 142     | 95.58      | 104.42  |
| -3.0                                                                 | 126                                               | 130     | 90.06      | 93.38   |
| -2.5                                                                 | 114                                               | 118     | 79.46      | 83.32   |
| -2.0                                                                 | 86                                                | 91      | 54.69      | 59.54   |
| -1.5                                                                 | 64                                                | 65      | 35.91      | 36.44   |
| -1.0                                                                 | 39                                                | 44      | 13.93      | 17.93   |
| -0.5                                                                 | 30                                                | 29      | 5.37       | 4.55    |
| 0.0                                                                  | 28                                                | 24      | 4.05       | 0.06    |
| 0.5                                                                  | 23                                                | 23      | -0.93      | -0.12   |
| 1.0                                                                  | 25                                                | 19      | 1.69       | -4.12   |
| Background                                                           | 24                                                | 23      | 0.46       | -0.46   |

### PDE4B1 Activity

Substrate Conc.=100nM cAMP

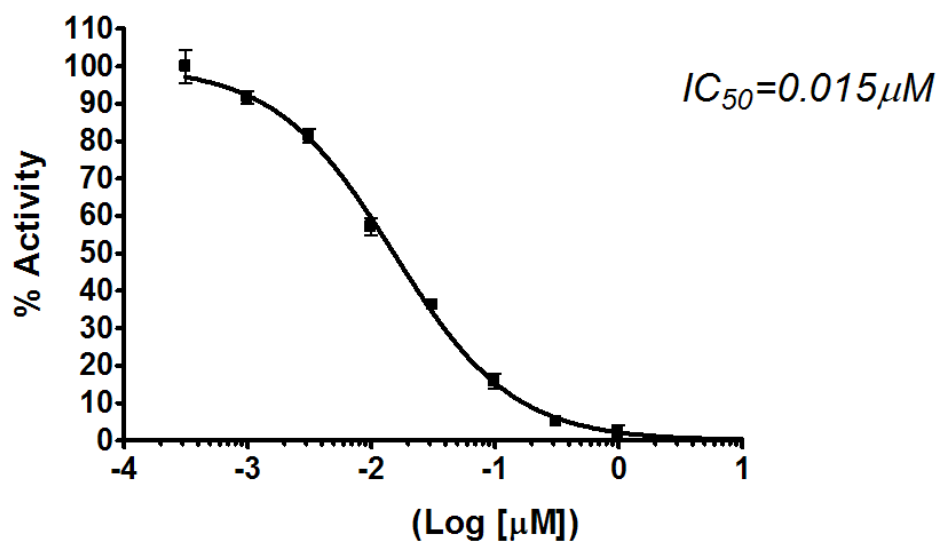

**Table 4.** Data for the Effect of (+)-(7*R*,7*aS*)-CMPI **1** on PDE4B1 Activity

| (+)-(7 <i>R</i> ,7 <i>aS</i> )-<br>CMPI <b>1</b><br>(Log [ $\mu$ M]) | PDE Activity<br>[(Fluorescent Polarization (mp))] |         | % Activity |         |
|----------------------------------------------------------------------|---------------------------------------------------|---------|------------|---------|
|                                                                      | Repeat1                                           | Repeat2 | Repeat1    | Repeat2 |
| No Compound                                                          | 138                                               | 130     | 103.22     | 96.78   |
| -3.0                                                                 | 134                                               | 132     | 100.37     | 98.47   |
| -2.5                                                                 | 130                                               | 131     | 96.59      | 97.60   |
| -2.0                                                                 | 120                                               | 125     | 87.35      | 92.00   |
| -1.5                                                                 | 116                                               | 113     | 83.77      | 81.43   |
| -1.0                                                                 | 89                                                | 85      | 60.08      | 56.65   |
| -0.5                                                                 | 56                                                | 55      | 31.12      | 30.46   |
| 0.0                                                                  | 41                                                | 36      | 17.48      | 13.77   |
| 0.5                                                                  | 29                                                | 29      | 7.37       | 7.36    |
| 1.0                                                                  | 28                                                | 34      | 6.45       | 11.52   |
| Background                                                           | 20                                                | 22      | -0.78      | 0.78    |

### PDE4B1 Activity

Substrate Conc.=100nM cAMP

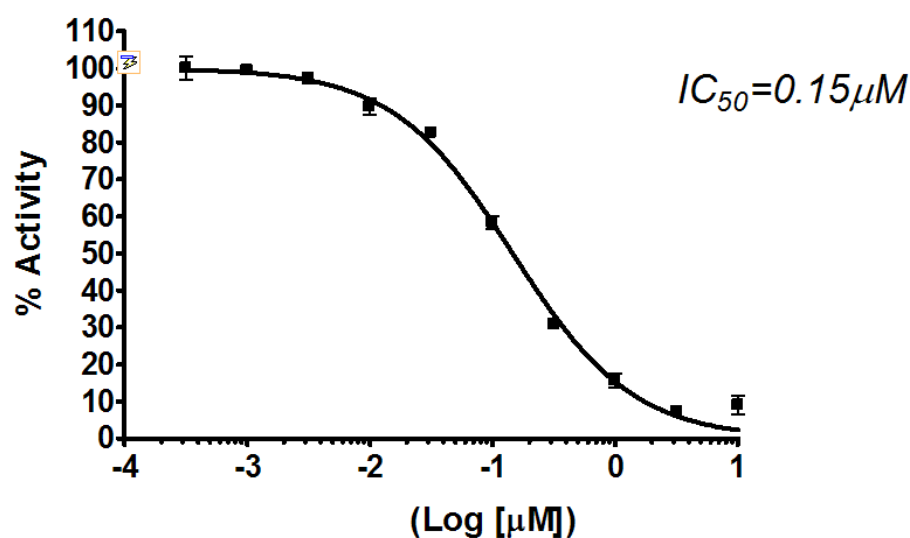

**Table 5.** Data for the Effect of (–)-(7*S*,7*aR*)-CMPO **2** on PDE4B1 Activity

| (–)-(7 <i>S</i> ,7 <i>aR</i> )-<br>CMPO <b>2</b><br>(Log [ $\mu$ M]) | PDE Activity<br>[(Fluorescent Polarization (mp))] |         | % Activity |         |
|----------------------------------------------------------------------|---------------------------------------------------|---------|------------|---------|
|                                                                      | Repeat1                                           | Repeat2 | Repeat1    | Repeat2 |
| No Compound                                                          | 124                                               | 128     | 98.18      | 101.82  |
| -3.0                                                                 | 115                                               | 119     | 89.84      | 93.88   |
| -2.5                                                                 | 108                                               | 121     | 83.15      | 95.85   |
| -2.0                                                                 | 100                                               | 103     | 74.47      | 77.61   |
| -1.5                                                                 | 76                                                | 79      | 51.53      | 53.91   |
| -1.0                                                                 | 52                                                | 52      | 28.18      | 27.53   |
| -0.5                                                                 | 40                                                | 34      | 15.88      | 9.80    |
| 0.0                                                                  | 28                                                | 24      | 3.97       | 0.47    |
| 0.5                                                                  | 25                                                | 31      | 1.39       | 6.91    |
| 1.0                                                                  | 25                                                | 27      | 1.56       | 3.65    |
| Background                                                           | 25                                                | 22      | 1.82       | -1.82   |

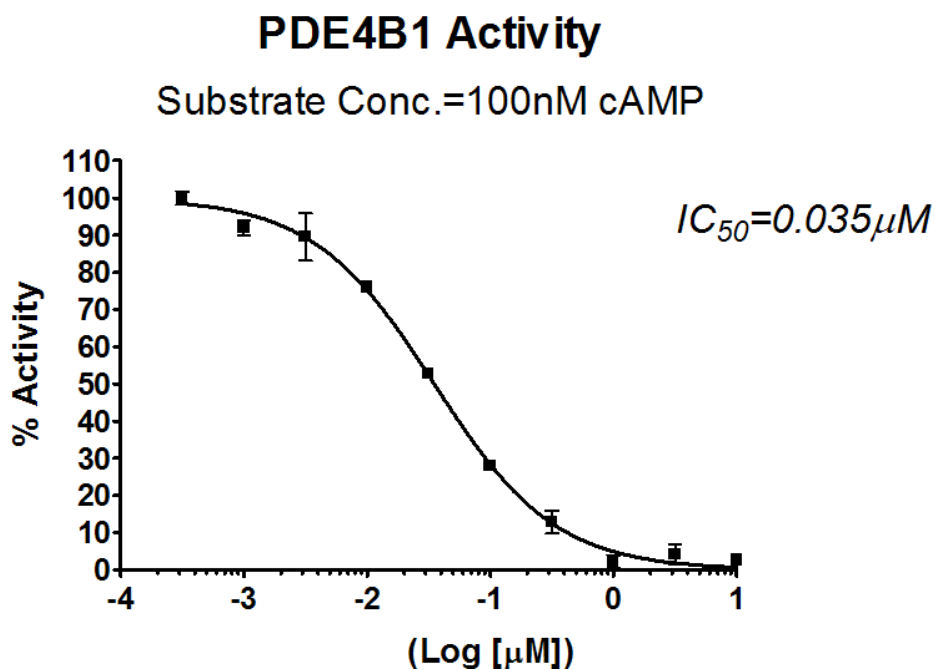

**Table 6.** Data for the Effect of (+)-(7*R*,7*aS*)-CMPO **2** on PDE4B1 Activity

| (+)-(7 <i>R</i> ,7 <i>aS</i> )-<br>CMPO <b>2</b><br>(Log [ $\mu$ M]) | PDE Activity<br>[(Fluorescent Polarization (mp))] |         | % Activity |         |
|----------------------------------------------------------------------|---------------------------------------------------|---------|------------|---------|
|                                                                      | Repeat1                                           | Repeat2 | Repeat1    | Repeat2 |
| No Compound                                                          | 118                                               | 122     | 98.06      | 101.94  |
| -3.0                                                                 | 119                                               | 117     | 99.22      | 96.97   |
| -2.5                                                                 | 115                                               | 113     | 94.81      | 92.34   |
| -2.0                                                                 | 112                                               | 108     | 91.53      | 87.93   |
| -1.5                                                                 | 97                                                | 98      | 76.61      | 77.99   |
| -1.0                                                                 | 75                                                | 78      | 53.95      | 57.75   |
| -0.5                                                                 | 57                                                | 58      | 36.35      | 37.38   |
| 0.0                                                                  | 40                                                | 47      | 18.99      | 26.13   |
| 0.5                                                                  | 26                                                | 29      | 4.76       | 7.32    |
| 1.0                                                                  | 25                                                | 25      | 3.72       | 3.19    |
| Background                                                           | 22                                                | 21      | 0.51       | -0.51   |

### PDE4B1 Activity

Substrate Conc.=100nM cAMP

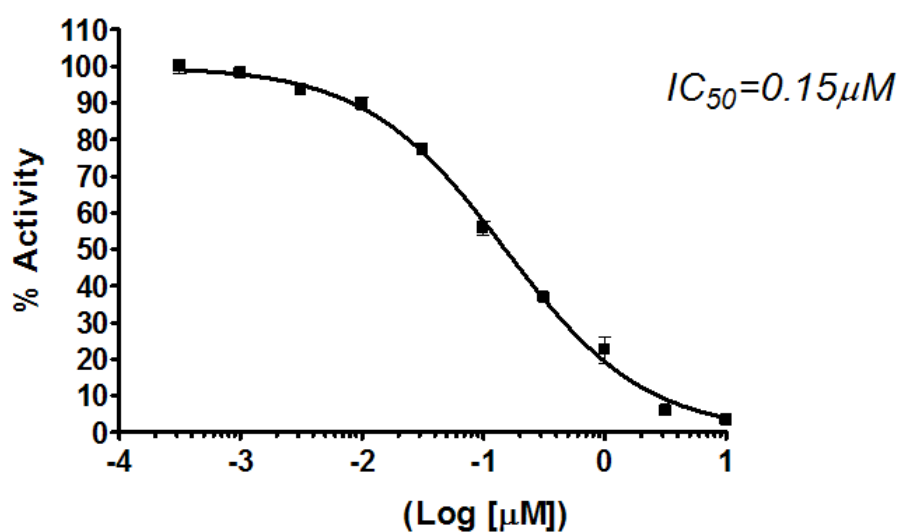

**Table 7.** Data for the Effect of *rac*-CMPO **2** on PDE4B1 Activity

| <i>rac</i> -CMPO <b>2</b><br>(Log [ $\mu$ M]) | PDE Activity<br>[(Fluorescent Polarization (mp))] |         | % Activity |         |
|-----------------------------------------------|---------------------------------------------------|---------|------------|---------|
|                                               | Repeat1                                           | Repeat2 | Repeat1    | Repeat2 |
| No Compound                                   | 128                                               | 136     | 96.60      | 103.40  |
| -3.0                                          | 130                                               | 134     | 97.90      | 101.81  |
| -2.5                                          | 133                                               | 132     | 100.83     | 99.79   |
| -2.0                                          | 109                                               | 119     | 79.24      | 88.69   |
| -1.5                                          | 95                                                | 102     | 66.96      | 73.04   |
| -1.0                                          | 66                                                | 70      | 41.25      | 44.82   |
| -0.5                                          | 41                                                | 44      | 19.13      | 21.52   |
| 0.0                                           | 28                                                | 28      | 7.28       | 7.76    |
| 0.5                                           | 23                                                | 25      | 3.12       | 5.10    |
| 1.0                                           | 20                                                | 29      | 0.66       | 8.14    |
| Background                                    | 15                                                | 24      | -4.18      | 4.18    |

## PDE4B1 Activity

Substrate Conc.=100nM cAMP

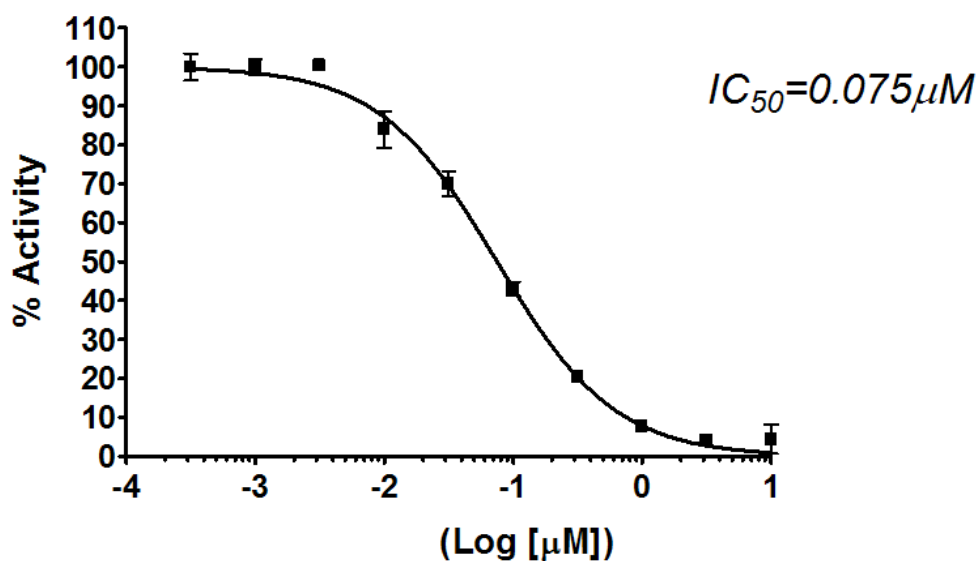

## Molecular docking of CMPI 1 and CMPO 2 enantiomers

Despite the structural diversity of the PDE IVB structures available to the moment (~35) and their co-crystallized ligands the binding site of the PDE IVB is rather rigid. For example, overlapping of the 3KKT and 1XLX results in the almost identical binding site except the C-capped terminus (see Figure 1) suggesting that the interactions of ligands with these binding sites will be very similar. Thus, only one PDE IVB structure (3KKT) was used to study binding of CMPI 1 and CMPO 2 enantiomers.

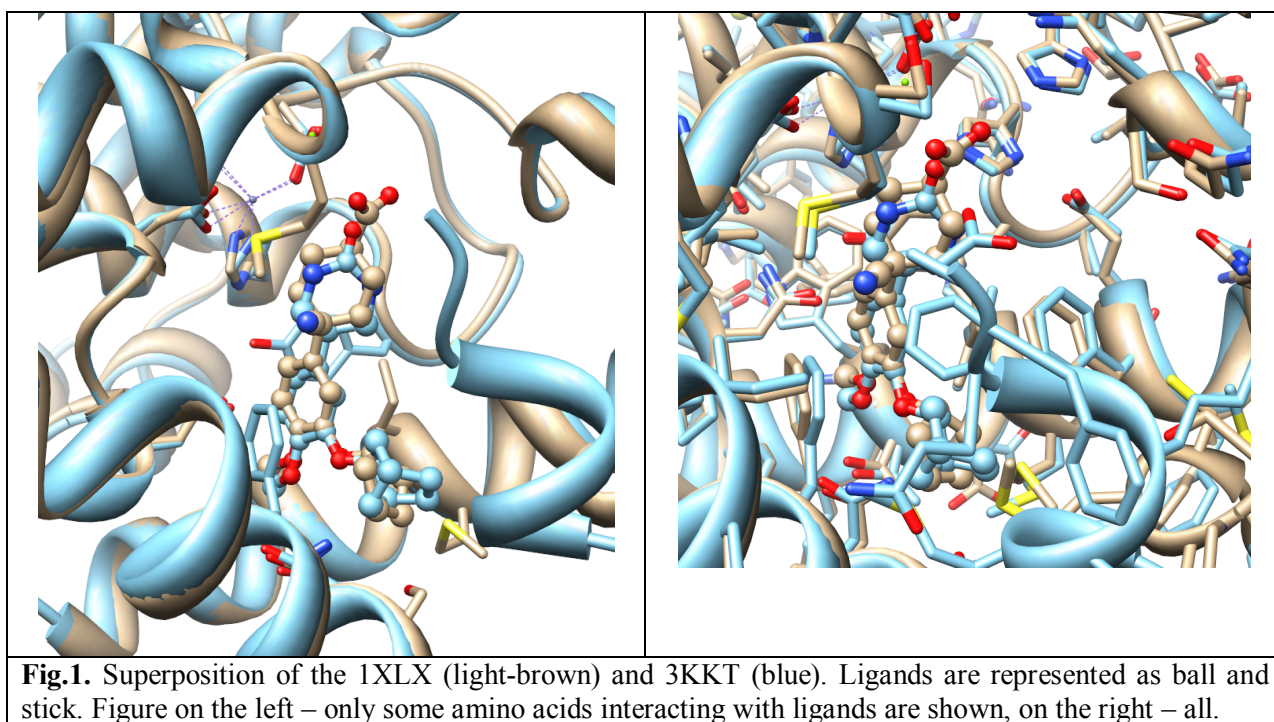

Protein structure was prepared according to classical AutoDock scenario: ligand and water molecules were removed, atoms of  $\text{Zn}^{2+}$  and  $\text{Mg}^{2+}$  were remained in the protein structure, nonpolar hydrogens, Gasteiger-Huckel charges and studied ligands CMPI 1 and CMPO 2 were added to protein. Spatial structures of the ligands were calculated with OpenBabel. Top scored poses according to predicted free energy of binding were selected for further discussion of protein-ligand interactions (Table 8). Visualization of interactions of molecules CMPI 1 and CMPO 2 with PDE IVB was done using Pymol v. 0.99.

**Table 8.** Predicted affinities for CMPI-1 and CMPO-2 enantiomers

| Compound                              | Affinity, kcal/mol (AutoDock Vina) |
|---------------------------------------|------------------------------------|
| (-)-(7 <i>S</i> ,7 <i>aR</i> )-CMPI 1 | -10.2                              |
| (+)-(7 <i>R</i> ,7 <i>aS</i> )-CMPI 1 | -10.5                              |
| (-)-(7 <i>S</i> ,7 <i>aR</i> )-CMPO 2 | -10.5                              |
| (+)-(7 <i>R</i> ,7 <i>aS</i> )-CMPO 2 | -10.4                              |
